# Supplementary material for: Assessing the Pyloric Caeca and Distal Gut Microbiota Correlation with Flesh Color in Atlantic Salmon (Salmo salar L., 1758)
Source: Microorganisms. 2020 Aug 16;8(8):1244. doi: 10.3390/microorganisms8081244 (PMC7464769; doi:10.3390/microorganisms8081244)
Supplement: Supplementary file 1 [file microorganisms-08-01244-s001.xlsx]

## Sheet: 1-metadata
sample_id	sample_name	collection_device	collection_method	collection_timestamp	Cage	dna_extracted	elevation	elevation_units	empo_1	empo_2	empo_3	env_biome	env_feature	env_material	env_package	geo_loc_name	host_age	host_age_units	host_body_habitat	host_body_product	host_body_site	host_common_name	host_length	host_length_units	host_scientific_name	host_subject_id	host_taxid	host_weight	host_weight_units	host_health	latitude	latitude_units	life_stage	longitude	longitude_units	physical_specimen_location	physical_specimen_remaining	sample_type	scientific_name	host_sex	taxon_id	title	LIBRARY_CONSTRUCTION_PROTOCOL	LINKER	PLATFORM	RUN_CENTER	RUN_PREFIX	sequencing_meth	target_gene
1	D1	scissors and forceps	cut	2019-04-02	25(27)	TRUE	0	meters	Host-associated	Animal	Animal distal gut	marine biome	animal-associated habitat	intestine environment	host-associated	Australia:Tasmania	23	months	UBERON:gastrointestinal system	UBERON:lumen of gut	UBERON:colon	Atlantic salmon	548	cm	Salmo salar	0001	8030	1.98	kg	healthy	-41.1848	Decimal degrees	adult	146.371	Decimal degrees	stored in RNAlater and freezer at -80C	FALSE	other	metagenome	female	256318	Salmonid gut microbiome	Image analysis was performed in real time by the MiSeq Control Software (MCS) v2.6.2.1 and Real Time Analysis (RTA) v1.18.54, running on the instrument computer. RTA performs real-time base calling on the MiSeq instrument computer. Then the Illumina bcl2fastq 2.20.0.422 pipeline was used to generate the sequence data. The data generated here meet the AGRF quality standards	2 NT	Illumina	Australian Genome Research Facility	not provided	Sequencing by synthesis	16S rRNA
2	D2	scissors and forceps	cut	2019-04-02	25(27)	TRUE	0	meters	Host-associated	Animal	Animal distal gut	marine biome	animal-associated habitat	intestine environment	host-associated	Australia:Tasmania	23	months	UBERON:gastrointestinal system	UBERON:lumen of gut	UBERON:colon	Atlantic salmon	537	cm	Salmo salar	0002	8030	2.14	kg	healthy	-41.1848	Decimal degrees	adult	146.371	Decimal degrees	stored in RNAlater and freezer at -80C	FALSE	other	metagenome	female	256318	Salmonid gut microbiome	Image analysis was performed in real time by the MiSeq Control Software (MCS) v2.6.2.1 and Real Time Analysis (RTA) v1.18.54, running on the instrument computer. RTA performs real-time base calling on the MiSeq instrument computer. Then the Illumina bcl2fastq 2.20.0.422 pipeline was used to generate the sequence data. The data generated here meet the AGRF quality standards	2 NT	Illumina	Australian Genome Research Facility	not provided	Sequencing by synthesis	16S rRNA
3	D3	scissors and forceps	cut	2019-04-02	25(27)	TRUE	0	meters	Host-associated	Animal	Animal distal gut	marine biome	animal-associated habitat	intestine environment	host-associated	Australia:Tasmania	23	months	UBERON:gastrointestinal system	UBERON:lumen of gut	UBERON:colon	Atlantic salmon	454	cm	Salmo salar	0003	8030	1.32	kg	healthy	-41.1848	Decimal degrees	adult	146.371	Decimal degrees	stored in RNAlater and freezer at -80C	FALSE	other	metagenome	female	256318	Salmonid gut microbiome	Image analysis was performed in real time by the MiSeq Control Software (MCS) v2.6.2.1 and Real Time Analysis (RTA) v1.18.54, running on the instrument computer. RTA performs real-time base calling on the MiSeq instrument computer. Then the Illumina bcl2fastq 2.20.0.422 pipeline was used to generate the sequence data. The data generated here meet the AGRF quality standards	2 NT	Illumina	Australian Genome Research Facility	not provided	Sequencing by synthesis	16S rRNA
4	D4	scissors and forceps	cut	2019-04-02	25(27)	TRUE	0	meters	Host-associated	Animal	Animal distal gut	marine biome	animal-associated habitat	intestine environment	host-associated	Australia:Tasmania	23	months	UBERON:gastrointestinal system	UBERON:lumen of gut	UBERON:colon	Atlantic salmon	575	cm	Salmo salar	0004	8030	2.25	kg	healthy	-41.1848	Decimal degrees	adult	146.371	Decimal degrees	stored in RNAlater and freezer at -80C	FALSE	other	metagenome	female	256318	Salmonid gut microbiome	Image analysis was performed in real time by the MiSeq Control Software (MCS) v2.6.2.1 and Real Time Analysis (RTA) v1.18.54, running on the instrument computer. RTA performs real-time base calling on the MiSeq instrument computer. Then the Illumina bcl2fastq 2.20.0.422 pipeline was used to generate the sequence data. The data generated here meet the AGRF quality standards	2 NT	Illumina	Australian Genome Research Facility	not provided	Sequencing by synthesis	16S rRNA
5	D5	scissors and forceps	cut	2019-04-02	25(27)	TRUE	0	meters	Host-associated	Animal	Animal distal gut	marine biome	animal-associated habitat	intestine environment	host-associated	Australia:Tasmania	23	months	UBERON:gastrointestinal system	UBERON:lumen of gut	UBERON:colon	Atlantic salmon	525	cm	Salmo salar	0005	8030	1.74	kg	healthy	-41.1848	Decimal degrees	adult	146.371	Decimal degrees	stored in RNAlater and freezer at -80C	FALSE	other	metagenome	female	256318	Salmonid gut microbiome	Image analysis was performed in real time by the MiSeq Control Software (MCS) v2.6.2.1 and Real Time Analysis (RTA) v1.18.54, running on the instrument computer. RTA performs real-time base calling on the MiSeq instrument computer. Then the Illumina bcl2fastq 2.20.0.422 pipeline was used to generate the sequence data. The data generated here meet the AGRF quality standards	2 NT	Illumina	Australian Genome Research Facility	not provided	Sequencing by synthesis	16S rRNA
6	D6	scissors and forceps	cut	2019-04-02	25(27)	TRUE	0	meters	Host-associated	Animal	Animal distal gut	marine biome	animal-associated habitat	intestine environment	host-associated	Australia:Tasmania	23	months	UBERON:gastrointestinal system	UBERON:lumen of gut	UBERON:colon	Atlantic salmon	557	cm	Salmo salar	0006	8030	2.35	kg	healthy	-41.1848	Decimal degrees	adult	146.371	Decimal degrees	stored in RNAlater and freezer at -80C	FALSE	other	metagenome	female	256318	Salmonid gut microbiome	Image analysis was performed in real time by the MiSeq Control Software (MCS) v2.6.2.1 and Real Time Analysis (RTA) v1.18.54, running on the instrument computer. RTA performs real-time base calling on the MiSeq instrument computer. Then the Illumina bcl2fastq 2.20.0.422 pipeline was used to generate the sequence data. The data generated here meet the AGRF quality standards	2 NT	Illumina	Australian Genome Research Facility	not provided	Sequencing by synthesis	16S rRNA
7	D7	scissors and forceps	cut	2019-04-02	25(27)	TRUE	0	meters	Host-associated	Animal	Animal distal gut	marine biome	animal-associated habitat	intestine environment	host-associated	Australia:Tasmania	23	months	UBERON:gastrointestinal system	UBERON:lumen of gut	UBERON:colon	Atlantic salmon	557	cm	Salmo salar	0007	8030	2.2	kg	healthy	-41.1848	Decimal degrees	adult	146.371	Decimal degrees	stored in RNAlater and freezer at -80C	FALSE	other	metagenome	female	256318	Salmonid gut microbiome	Image analysis was performed in real time by the MiSeq Control Software (MCS) v2.6.2.1 and Real Time Analysis (RTA) v1.18.54, running on the instrument computer. RTA performs real-time base calling on the MiSeq instrument computer. Then the Illumina bcl2fastq 2.20.0.422 pipeline was used to generate the sequence data. The data generated here meet the AGRF quality standards	2 NT	Illumina	Australian Genome Research Facility	not provided	Sequencing by synthesis	16S rRNA
8	D8	scissors and forceps	cut	2019-04-02	25(27)	TRUE	0	meters	Host-associated	Animal	Animal distal gut	marine biome	animal-associated habitat	intestine environment	host-associated	Australia:Tasmania	23	months	UBERON:gastrointestinal system	UBERON:lumen of gut	UBERON:colon	Atlantic salmon	554	cm	Salmo salar	0008	8030	2.36	kg	healthy	-41.1848	Decimal degrees	adult	146.371	Decimal degrees	stored in RNAlater and freezer at -80C	FALSE	other	metagenome	female	256318	Salmonid gut microbiome	Image analysis was performed in real time by the MiSeq Control Software (MCS) v2.6.2.1 and Real Time Analysis (RTA) v1.18.54, running on the instrument computer. RTA performs real-time base calling on the MiSeq instrument computer. Then the Illumina bcl2fastq 2.20.0.422 pipeline was used to generate the sequence data. The data generated here meet the AGRF quality standards	2 NT	Illumina	Australian Genome Research Facility	not provided	Sequencing by synthesis	16S rRNA
9	D9	scissors and forceps	cut	2019-04-02	25(27)	TRUE	0	meters	Host-associated	Animal	Animal distal gut	marine biome	animal-associated habitat	intestine environment	host-associated	Australia:Tasmania	23	months	UBERON:gastrointestinal system	UBERON:lumen of gut	UBERON:colon	Atlantic salmon	555	cm	Salmo salar	0009	8030	2.35	kg	healthy	-41.1848	Decimal degrees	adult	146.371	Decimal degrees	stored in RNAlater and freezer at -80C	FALSE	other	metagenome	female	256318	Salmonid gut microbiome	Image analysis was performed in real time by the MiSeq Control Software (MCS) v2.6.2.1 and Real Time Analysis (RTA) v1.18.54, running on the instrument computer. RTA performs real-time base calling on the MiSeq instrument computer. Then the Illumina bcl2fastq 2.20.0.422 pipeline was used to generate the sequence data. The data generated here meet the AGRF quality standards	2 NT	Illumina	Australian Genome Research Facility	not provided	Sequencing by synthesis	16S rRNA
10	D10	scissors and forceps	cut	2019-04-02	25(27)	TRUE	0	meters	Host-associated	Animal	Animal distal gut	marine biome	animal-associated habitat	intestine environment	host-associated	Australia:Tasmania	23	months	UBERON:gastrointestinal system	UBERON:lumen of gut	UBERON:colon	Atlantic salmon	575	cm	Salmo salar	0010	8030	2.36	kg	healthy	-41.1848	Decimal degrees	adult	146.371	Decimal degrees	stored in RNAlater and freezer at -80C	FALSE	other	metagenome	female	256318	Salmonid gut microbiome	Image analysis was performed in real time by the MiSeq Control Software (MCS) v2.6.2.1 and Real Time Analysis (RTA) v1.18.54, running on the instrument computer. RTA performs real-time base calling on the MiSeq instrument computer. Then the Illumina bcl2fastq 2.20.0.422 pipeline was used to generate the sequence data. The data generated here meet the AGRF quality standards	2 NT	Illumina	Australian Genome Research Facility	not provided	Sequencing by synthesis	16S rRNA
11	D11	scissors and forceps	cut	2019-04-02	25(27)	TRUE	0	meters	Host-associated	Animal	Animal distal gut	marine biome	animal-associated habitat	intestine environment	host-associated	Australia:Tasmania	23	months	UBERON:gastrointestinal system	UBERON:lumen of gut	UBERON:colon	Atlantic salmon	590	cm	Salmo salar	0011	8030	2.39	kg	healthy	-41.1848	Decimal degrees	adult	146.371	Decimal degrees	stored in RNAlater and freezer at -80C	FALSE	other	metagenome	female	256318	Salmonid gut microbiome	Image analysis was performed in real time by the MiSeq Control Software (MCS) v2.6.2.1 and Real Time Analysis (RTA) v1.18.54, running on the instrument computer. RTA performs real-time base calling on the MiSeq instrument computer. Then the Illumina bcl2fastq 2.20.0.422 pipeline was used to generate the sequence data. The data generated here meet the AGRF quality standards	2 NT	Illumina	Australian Genome Research Facility	not provided	Sequencing by synthesis	16S rRNA
12	D12	scissors and forceps	cut	2019-04-02	25(27)	TRUE	0	meters	Host-associated	Animal	Animal distal gut	marine biome	animal-associated habitat	intestine environment	host-associated	Australia:Tasmania	23	months	UBERON:gastrointestinal system	UBERON:lumen of gut	UBERON:colon	Atlantic salmon	576	cm	Salmo salar	0012	8030	2.57	kg	healthy	-41.1848	Decimal degrees	adult	146.371	Decimal degrees	stored in RNAlater and freezer at -80C	FALSE	other	metagenome	female	256318	Salmonid gut microbiome	Image analysis was performed in real time by the MiSeq Control Software (MCS) v2.6.2.1 and Real Time Analysis (RTA) v1.18.54, running on the instrument computer. RTA performs real-time base calling on the MiSeq instrument computer. Then the Illumina bcl2fastq 2.20.0.422 pipeline was used to generate the sequence data. The data generated here meet the AGRF quality standards	2 NT	Illumina	Australian Genome Research Facility	not provided	Sequencing by synthesis	16S rRNA
13	D13	scissors and forceps	cut	2019-04-02	25(27)	TRUE	0	meters	Host-associated	Animal	Animal distal gut	marine biome	animal-associated habitat	intestine environment	host-associated	Australia:Tasmania	23	months	UBERON:gastrointestinal system	UBERON:lumen of gut	UBERON:colon	Atlantic salmon	540	cm	Salmo salar	0013	8030	2.04	kg	healthy	-41.1848	Decimal degrees	adult	146.371	Decimal degrees	stored in RNAlater and freezer at -80C	FALSE	other	metagenome	female	256318	Salmonid gut microbiome	Image analysis was performed in real time by the MiSeq Control Software (MCS) v2.6.2.1 and Real Time Analysis (RTA) v1.18.54, running on the instrument computer. RTA performs real-time base calling on the MiSeq instrument computer. Then the Illumina bcl2fastq 2.20.0.422 pipeline was used to generate the sequence data. The data generated here meet the AGRF quality standards	2 NT	Illumina	Australian Genome Research Facility	not provided	Sequencing by synthesis	16S rRNA
14	D14	scissors and forceps	cut	2019-04-02	25(27)	TRUE	0	meters	Host-associated	Animal	Animal distal gut	marine biome	animal-associated habitat	intestine environment	host-associated	Australia:Tasmania	23	months	UBERON:gastrointestinal system	UBERON:lumen of gut	UBERON:colon	Atlantic salmon	590	cm	Salmo salar	0014	8030	3.06	kg	healthy	-41.1848	Decimal degrees	adult	146.371	Decimal degrees	stored in RNAlater and freezer at -80C	FALSE	other	metagenome	female	256318	Salmonid gut microbiome	Image analysis was performed in real time by the MiSeq Control Software (MCS) v2.6.2.1 and Real Time Analysis (RTA) v1.18.54, running on the instrument computer. RTA performs real-time base calling on the MiSeq instrument computer. Then the Illumina bcl2fastq 2.20.0.422 pipeline was used to generate the sequence data. The data generated here meet the AGRF quality standards	2 NT	Illumina	Australian Genome Research Facility	not provided	Sequencing by synthesis	16S rRNA
15	D16	scissors and forceps	cut	2019-04-02	25(27)	TRUE	0	meters	Host-associated	Animal	Animal distal gut	marine biome	animal-associated habitat	intestine environment	host-associated	Australia:Tasmania	23	months	UBERON:gastrointestinal system	UBERON:lumen of gut	UBERON:colon	Atlantic salmon	640	cm	Salmo salar	0016	8030	3.54	kg	healthy	-41.1848	Decimal degrees	adult	146.371	Decimal degrees	stored in RNAlater and freezer at -80C	FALSE	other	metagenome	female	256318	Salmonid gut microbiome	Image analysis was performed in real time by the MiSeq Control Software (MCS) v2.6.2.1 and Real Time Analysis (RTA) v1.18.54, running on the instrument computer. RTA performs real-time base calling on the MiSeq instrument computer. Then the Illumina bcl2fastq 2.20.0.422 pipeline was used to generate the sequence data. The data generated here meet the AGRF quality standards	2 NT	Illumina	Australian Genome Research Facility	not provided	Sequencing by synthesis	16S rRNA
16	D17	scissors and forceps	cut	2019-04-02	25(27)	TRUE	0	meters	Host-associated	Animal	Animal distal gut	marine biome	animal-associated habitat	intestine environment	host-associated	Australia:Tasmania	23	months	UBERON:gastrointestinal system	UBERON:lumen of gut	UBERON:colon	Atlantic salmon	601	cm	Salmo salar	0017	8030	3.01	kg	healthy	-41.1848	Decimal degrees	adult	146.371	Decimal degrees	stored in RNAlater and freezer at -80C	FALSE	other	metagenome	female	256318	Salmonid gut microbiome	Image analysis was performed in real time by the MiSeq Control Software (MCS) v2.6.2.1 and Real Time Analysis (RTA) v1.18.54, running on the instrument computer. RTA performs real-time base calling on the MiSeq instrument computer. Then the Illumina bcl2fastq 2.20.0.422 pipeline was used to generate the sequence data. The data generated here meet the AGRF quality standards	2 NT	Illumina	Australian Genome Research Facility	not provided	Sequencing by synthesis	16S rRNA
17	D18	scissors and forceps	cut	2019-04-02	25(27)	TRUE	0	meters	Host-associated	Animal	Animal distal gut	marine biome	animal-associated habitat	intestine environment	host-associated	Australia:Tasmania	23	months	UBERON:gastrointestinal system	UBERON:lumen of gut	UBERON:colon	Atlantic salmon	518	cm	Salmo salar	0018	8030	1.56	kg	healthy	-41.1848	Decimal degrees	adult	146.371	Decimal degrees	stored in RNAlater and freezer at -80C	FALSE	other	metagenome	female	256318	Salmonid gut microbiome	Image analysis was performed in real time by the MiSeq Control Software (MCS) v2.6.2.1 and Real Time Analysis (RTA) v1.18.54, running on the instrument computer. RTA performs real-time base calling on the MiSeq instrument computer. Then the Illumina bcl2fastq 2.20.0.422 pipeline was used to generate the sequence data. The data generated here meet the AGRF quality standards	2 NT	Illumina	Australian Genome Research Facility	not provided	Sequencing by synthesis	16S rRNA
18	D19	scissors and forceps	cut	2019-04-02	25(27)	TRUE	0	meters	Host-associated	Animal	Animal distal gut	marine biome	animal-associated habitat	intestine environment	host-associated	Australia:Tasmania	23	months	UBERON:gastrointestinal system	UBERON:lumen of gut	UBERON:colon	Atlantic salmon	530	cm	Salmo salar	0019	8030	1.75	kg	healthy	-41.1848	Decimal degrees	adult	146.371	Decimal degrees	stored in RNAlater and freezer at -80C	FALSE	other	metagenome	female	256318	Salmonid gut microbiome	Image analysis was performed in real time by the MiSeq Control Software (MCS) v2.6.2.1 and Real Time Analysis (RTA) v1.18.54, running on the instrument computer. RTA performs real-time base calling on the MiSeq instrument computer. Then the Illumina bcl2fastq 2.20.0.422 pipeline was used to generate the sequence data. The data generated here meet the AGRF quality standards	2 NT	Illumina	Australian Genome Research Facility	not provided	Sequencing by synthesis	16S rRNA
19	D20	scissors and forceps	cut	2019-04-02	25(27)	TRUE	0	meters	Host-associated	Animal	Animal distal gut	marine biome	animal-associated habitat	intestine environment	host-associated	Australia:Tasmania	23	months	UBERON:gastrointestinal system	UBERON:lumen of gut	UBERON:colon	Atlantic salmon	545	cm	Salmo salar	0020	8030	2.18	kg	healthy	-41.1848	Decimal degrees	adult	146.371	Decimal degrees	stored in RNAlater and freezer at -80C	FALSE	other	metagenome	female	256318	Salmonid gut microbiome	Image analysis was performed in real time by the MiSeq Control Software (MCS) v2.6.2.1 and Real Time Analysis (RTA) v1.18.54, running on the instrument computer. RTA performs real-time base calling on the MiSeq instrument computer. Then the Illumina bcl2fastq 2.20.0.422 pipeline was used to generate the sequence data. The data generated here meet the AGRF quality standards	2 NT	Illumina	Australian Genome Research Facility	not provided	Sequencing by synthesis	16S rRNA
20	D21	scissors and forceps	cut	2019-04-02	25(27)	TRUE	0	meters	Host-associated	Animal	Animal distal gut	marine biome	animal-associated habitat	intestine environment	host-associated	Australia:Tasmania	23	months	UBERON:gastrointestinal system	UBERON:lumen of gut	UBERON:colon	Atlantic salmon	580	cm	Salmo salar	0021	8030	2.41	kg	healthy	-41.1848	Decimal degrees	adult	146.371	Decimal degrees	stored in RNAlater and freezer at -80C	FALSE	other	metagenome	female	256318	Salmonid gut microbiome	Image analysis was performed in real time by the MiSeq Control Software (MCS) v2.6.2.1 and Real Time Analysis (RTA) v1.18.54, running on the instrument computer. RTA performs real-time base calling on the MiSeq instrument computer. Then the Illumina bcl2fastq 2.20.0.422 pipeline was used to generate the sequence data. The data generated here meet the AGRF quality standards	2 NT	Illumina	Australian Genome Research Facility	not provided	Sequencing by synthesis	16S rRNA
21	D22	scissors and forceps	cut	2019-04-02	25(27)	TRUE	0	meters	Host-associated	Animal	Animal distal gut	marine biome	animal-associated habitat	intestine environment	host-associated	Australia:Tasmania	23	months	UBERON:gastrointestinal system	UBERON:lumen of gut	UBERON:colon	Atlantic salmon	607	cm	Salmo salar	0022	8030	3.18	kg	healthy	-41.1848	Decimal degrees	adult	146.371	Decimal degrees	stored in RNAlater and freezer at -80C	FALSE	other	metagenome	female	256318	Salmonid gut microbiome	Image analysis was performed in real time by the MiSeq Control Software (MCS) v2.6.2.1 and Real Time Analysis (RTA) v1.18.54, running on the instrument computer. RTA performs real-time base calling on the MiSeq instrument computer. Then the Illumina bcl2fastq 2.20.0.422 pipeline was used to generate the sequence data. The data generated here meet the AGRF quality standards	2 NT	Illumina	Australian Genome Research Facility	not provided	Sequencing by synthesis	16S rRNA
22	D23	scissors and forceps	cut	2019-04-02	25(27)	TRUE	0	meters	Host-associated	Animal	Animal distal gut	marine biome	animal-associated habitat	intestine environment	host-associated	Australia:Tasmania	23	months	UBERON:gastrointestinal system	UBERON:lumen of gut	UBERON:colon	Atlantic salmon	530	cm	Salmo salar	0023	8030	1.93	kg	healthy	-41.1848	Decimal degrees	adult	146.371	Decimal degrees	stored in RNAlater and freezer at -80C	FALSE	other	metagenome	female	256318	Salmonid gut microbiome	Image analysis was performed in real time by the MiSeq Control Software (MCS) v2.6.2.1 and Real Time Analysis (RTA) v1.18.54, running on the instrument computer. RTA performs real-time base calling on the MiSeq instrument computer. Then the Illumina bcl2fastq 2.20.0.422 pipeline was used to generate the sequence data. The data generated here meet the AGRF quality standards	2 NT	Illumina	Australian Genome Research Facility	not provided	Sequencing by synthesis	16S rRNA
23	D24	scissors and forceps	cut	2019-04-02	25(27)	TRUE	0	meters	Host-associated	Animal	Animal distal gut	marine biome	animal-associated habitat	intestine environment	host-associated	Australia:Tasmania	23	months	UBERON:gastrointestinal system	UBERON:lumen of gut	UBERON:colon	Atlantic salmon	582	cm	Salmo salar	0024	8030	2.3	kg	healthy	-41.1848	Decimal degrees	adult	146.371	Decimal degrees	stored in RNAlater and freezer at -80C	FALSE	other	metagenome	female	256318	Salmonid gut microbiome	Image analysis was performed in real time by the MiSeq Control Software (MCS) v2.6.2.1 and Real Time Analysis (RTA) v1.18.54, running on the instrument computer. RTA performs real-time base calling on the MiSeq instrument computer. Then the Illumina bcl2fastq 2.20.0.422 pipeline was used to generate the sequence data. The data generated here meet the AGRF quality standards	2 NT	Illumina	Australian Genome Research Facility	not provided	Sequencing by synthesis	16S rRNA
24	D25	scissors and forceps	cut	2019-04-02	25(27)	TRUE	0	meters	Host-associated	Animal	Animal distal gut	marine biome	animal-associated habitat	intestine environment	host-associated	Australia:Tasmania	23	months	UBERON:gastrointestinal system	UBERON:lumen of gut	UBERON:colon	Atlantic salmon	531	cm	Salmo salar	0025	8030	1.48	kg	healthy	-41.1848	Decimal degrees	adult	146.371	Decimal degrees	stored in RNAlater and freezer at -80C	FALSE	other	metagenome	female	256318	Salmonid gut microbiome	Image analysis was performed in real time by the MiSeq Control Software (MCS) v2.6.2.1 and Real Time Analysis (RTA) v1.18.54, running on the instrument computer. RTA performs real-time base calling on the MiSeq instrument computer. Then the Illumina bcl2fastq 2.20.0.422 pipeline was used to generate the sequence data. The data generated here meet the AGRF quality standards	2 NT	Illumina	Australian Genome Research Facility	not provided	Sequencing by synthesis	16S rRNA
25	D26	scissors and forceps	cut	2019-04-02	25(27)	TRUE	0	meters	Host-associated	Animal	Animal distal gut	marine biome	animal-associated habitat	intestine environment	host-associated	Australia:Tasmania	23	months	UBERON:gastrointestinal system	UBERON:lumen of gut	UBERON:colon	Atlantic salmon	547	cm	Salmo salar	0026	8030	1.98	kg	healthy	-41.1848	Decimal degrees	adult	146.371	Decimal degrees	stored in RNAlater and freezer at -80C	FALSE	other	metagenome	female	256318	Salmonid gut microbiome	Image analysis was performed in real time by the MiSeq Control Software (MCS) v2.6.2.1 and Real Time Analysis (RTA) v1.18.54, running on the instrument computer. RTA performs real-time base calling on the MiSeq instrument computer. Then the Illumina bcl2fastq 2.20.0.422 pipeline was used to generate the sequence data. The data generated here meet the AGRF quality standards	2 NT	Illumina	Australian Genome Research Facility	not provided	Sequencing by synthesis	16S rRNA
26	D27	scissors and forceps	cut	2019-04-02	25(27)	TRUE	0	meters	Host-associated	Animal	Animal distal gut	marine biome	animal-associated habitat	intestine environment	host-associated	Australia:Tasmania	23	months	UBERON:gastrointestinal system	UBERON:lumen of gut	UBERON:colon	Atlantic salmon	575	cm	Salmo salar	0027	8030	2.71	kg	healthy	-41.1848	Decimal degrees	adult	146.371	Decimal degrees	stored in RNAlater and freezer at -80C	FALSE	other	metagenome	female	256318	Salmonid gut microbiome	Image analysis was performed in real time by the MiSeq Control Software (MCS) v2.6.2.1 and Real Time Analysis (RTA) v1.18.54, running on the instrument computer. RTA performs real-time base calling on the MiSeq instrument computer. Then the Illumina bcl2fastq 2.20.0.422 pipeline was used to generate the sequence data. The data generated here meet the AGRF quality standards	2 NT	Illumina	Australian Genome Research Facility	not provided	Sequencing by synthesis	16S rRNA
27	D28	scissors and forceps	cut	2019-04-02	25(27)	TRUE	0	meters	Host-associated	Animal	Animal distal gut	marine biome	animal-associated habitat	intestine environment	host-associated	Australia:Tasmania	23	months	UBERON:gastrointestinal system	UBERON:lumen of gut	UBERON:colon	Atlantic salmon	546	cm	Salmo salar	0028	8030	2.19	kg	healthy	-41.1848	Decimal degrees	adult	146.371	Decimal degrees	stored in RNAlater and freezer at -80C	FALSE	other	metagenome	female	256318	Salmonid gut microbiome	Image analysis was performed in real time by the MiSeq Control Software (MCS) v2.6.2.1 and Real Time Analysis (RTA) v1.18.54, running on the instrument computer. RTA performs real-time base calling on the MiSeq instrument computer. Then the Illumina bcl2fastq 2.20.0.422 pipeline was used to generate the sequence data. The data generated here meet the AGRF quality standards	2 NT	Illumina	Australian Genome Research Facility	not provided	Sequencing by synthesis	16S rRNA
28	D29	scissors and forceps	cut	2019-04-02	25(27)	TRUE	0	meters	Host-associated	Animal	Animal distal gut	marine biome	animal-associated habitat	intestine environment	host-associated	Australia:Tasmania	23	months	UBERON:gastrointestinal system	UBERON:lumen of gut	UBERON:colon	Atlantic salmon	534	cm	Salmo salar	0029	8030	2.08	kg	healthy	-41.1848	Decimal degrees	adult	146.371	Decimal degrees	stored in RNAlater and freezer at -80C	FALSE	other	metagenome	female	256318	Salmonid gut microbiome	Image analysis was performed in real time by the MiSeq Control Software (MCS) v2.6.2.1 and Real Time Analysis (RTA) v1.18.54, running on the instrument computer. RTA performs real-time base calling on the MiSeq instrument computer. Then the Illumina bcl2fastq 2.20.0.422 pipeline was used to generate the sequence data. The data generated here meet the AGRF quality standards	2 NT	Illumina	Australian Genome Research Facility	not provided	Sequencing by synthesis	16S rRNA
29	D30	scissors and forceps	cut	2019-04-02	25(27)	TRUE	0	meters	Host-associated	Animal	Animal distal gut	marine biome	animal-associated habitat	intestine environment	host-associated	Australia:Tasmania	23	months	UBERON:gastrointestinal system	UBERON:lumen of gut	UBERON:colon	Atlantic salmon	486	cm	Salmo salar	0030	8030	1.44	kg	healthy	-41.1848	Decimal degrees	adult	146.371	Decimal degrees	stored in RNAlater and freezer at -80C	FALSE	other	metagenome	female	256318	Salmonid gut microbiome	Image analysis was performed in real time by the MiSeq Control Software (MCS) v2.6.2.1 and Real Time Analysis (RTA) v1.18.54, running on the instrument computer. RTA performs real-time base calling on the MiSeq instrument computer. Then the Illumina bcl2fastq 2.20.0.422 pipeline was used to generate the sequence data. The data generated here meet the AGRF quality standards	2 NT	Illumina	Australian Genome Research Facility	not provided	Sequencing by synthesis	16S rRNA
30	D31	scissors and forceps	cut	2019-04-02	25(27)	TRUE	0	meters	Host-associated	Animal	Animal distal gut	marine biome	animal-associated habitat	intestine environment	host-associated	Australia:Tasmania	23	months	UBERON:gastrointestinal system	UBERON:lumen of gut	UBERON:colon	Atlantic salmon	569	cm	Salmo salar	0031	8030	2.35	kg	healthy	-41.1848	Decimal degrees	adult	146.371	Decimal degrees	stored in RNAlater and freezer at -80C	FALSE	other	metagenome	female	256318	Salmonid gut microbiome	Image analysis was performed in real time by the MiSeq Control Software (MCS) v2.6.2.1 and Real Time Analysis (RTA) v1.18.54, running on the instrument computer. RTA performs real-time base calling on the MiSeq instrument computer. Then the Illumina bcl2fastq 2.20.0.422 pipeline was used to generate the sequence data. The data generated here meet the AGRF quality standards	2 NT	Illumina	Australian Genome Research Facility	not provided	Sequencing by synthesis	16S rRNA
31	D32	scissors and forceps	cut	2019-04-02	25(27)	TRUE	0	meters	Host-associated	Animal	Animal distal gut	marine biome	animal-associated habitat	intestine environment	host-associated	Australia:Tasmania	23	months	UBERON:gastrointestinal system	UBERON:lumen of gut	UBERON:colon	Atlantic salmon	565	cm	Salmo salar	0032	8030	2.48	kg	healthy	-41.1848	Decimal degrees	adult	146.371	Decimal degrees	stored in RNAlater and freezer at -80C	FALSE	other	metagenome	female	256318	Salmonid gut microbiome	Image analysis was performed in real time by the MiSeq Control Software (MCS) v2.6.2.1 and Real Time Analysis (RTA) v1.18.54, running on the instrument computer. RTA performs real-time base calling on the MiSeq instrument computer. Then the Illumina bcl2fastq 2.20.0.422 pipeline was used to generate the sequence data. The data generated here meet the AGRF quality standards	2 NT	Illumina	Australian Genome Research Facility	not provided	Sequencing by synthesis	16S rRNA
32	D33	scissors and forceps	cut	2019-04-02	25(27)	TRUE	0	meters	Host-associated	Animal	Animal distal gut	marine biome	animal-associated habitat	intestine environment	host-associated	Australia:Tasmania	23	months	UBERON:gastrointestinal system	UBERON:lumen of gut	UBERON:colon	Atlantic salmon	573	cm	Salmo salar	0033	8030	2.72	kg	healthy	-41.1848	Decimal degrees	adult	146.371	Decimal degrees	stored in RNAlater and freezer at -80C	FALSE	other	metagenome	female	256318	Salmonid gut microbiome	Image analysis was performed in real time by the MiSeq Control Software (MCS) v2.6.2.1 and Real Time Analysis (RTA) v1.18.54, running on the instrument computer. RTA performs real-time base calling on the MiSeq instrument computer. Then the Illumina bcl2fastq 2.20.0.422 pipeline was used to generate the sequence data. The data generated here meet the AGRF quality standards	2 NT	Illumina	Australian Genome Research Facility	not provided	Sequencing by synthesis	16S rRNA
33	D34	scissors and forceps	cut	2019-04-02	25(27)	TRUE	0	meters	Host-associated	Animal	Animal distal gut	marine biome	animal-associated habitat	intestine environment	host-associated	Australia:Tasmania	23	months	UBERON:gastrointestinal system	UBERON:lumen of gut	UBERON:colon	Atlantic salmon	561	cm	Salmo salar	0034	8030	2.48	kg	healthy	-41.1848	Decimal degrees	adult	146.371	Decimal degrees	stored in RNAlater and freezer at -80C	FALSE	other	metagenome	female	256318	Salmonid gut microbiome	Image analysis was performed in real time by the MiSeq Control Software (MCS) v2.6.2.1 and Real Time Analysis (RTA) v1.18.54, running on the instrument computer. RTA performs real-time base calling on the MiSeq instrument computer. Then the Illumina bcl2fastq 2.20.0.422 pipeline was used to generate the sequence data. The data generated here meet the AGRF quality standards	2 NT	Illumina	Australian Genome Research Facility	not provided	Sequencing by synthesis	16S rRNA
34	D36	scissors and forceps	cut	2019-04-02	25(27)	TRUE	0	meters	Host-associated	Animal	Animal distal gut	marine biome	animal-associated habitat	intestine environment	host-associated	Australia:Tasmania	23	months	UBERON:gastrointestinal system	UBERON:lumen of gut	UBERON:colon	Atlantic salmon	574	cm	Salmo salar	0036	8030	1.93	kg	healthy	-41.1848	Decimal degrees	adult	146.371	Decimal degrees	stored in RNAlater and freezer at -80C	FALSE	other	metagenome	female	256318	Salmonid gut microbiome	Image analysis was performed in real time by the MiSeq Control Software (MCS) v2.6.2.1 and Real Time Analysis (RTA) v1.18.54, running on the instrument computer. RTA performs real-time base calling on the MiSeq instrument computer. Then the Illumina bcl2fastq 2.20.0.422 pipeline was used to generate the sequence data. The data generated here meet the AGRF quality standards	2 NT	Illumina	Australian Genome Research Facility	not provided	Sequencing by synthesis	16S rRNA
35	D37	scissors and forceps	cut	2019-04-02	25(27)	TRUE	0	meters	Host-associated	Animal	Animal distal gut	marine biome	animal-associated habitat	intestine environment	host-associated	Australia:Tasmania	23	months	UBERON:gastrointestinal system	UBERON:lumen of gut	UBERON:colon	Atlantic salmon	570	cm	Salmo salar	0037	8030	2.24	kg	healthy	-41.1848	Decimal degrees	adult	146.371	Decimal degrees	stored in RNAlater and freezer at -80C	FALSE	other	metagenome	female	256318	Salmonid gut microbiome	Image analysis was performed in real time by the MiSeq Control Software (MCS) v2.6.2.1 and Real Time Analysis (RTA) v1.18.54, running on the instrument computer. RTA performs real-time base calling on the MiSeq instrument computer. Then the Illumina bcl2fastq 2.20.0.422 pipeline was used to generate the sequence data. The data generated here meet the AGRF quality standards	2 NT	Illumina	Australian Genome Research Facility	not provided	Sequencing by synthesis	16S rRNA
36	D38	scissors and forceps	cut	2019-04-02	25(27)	TRUE	0	meters	Host-associated	Animal	Animal distal gut	marine biome	animal-associated habitat	intestine environment	host-associated	Australia:Tasmania	23	months	UBERON:gastrointestinal system	UBERON:lumen of gut	UBERON:colon	Atlantic salmon	540	cm	Salmo salar	0038	8030	1.88	kg	healthy	-41.1848	Decimal degrees	adult	146.371	Decimal degrees	stored in RNAlater and freezer at -80C	FALSE	other	metagenome	female	256318	Salmonid gut microbiome	Image analysis was performed in real time by the MiSeq Control Software (MCS) v2.6.2.1 and Real Time Analysis (RTA) v1.18.54, running on the instrument computer. RTA performs real-time base calling on the MiSeq instrument computer. Then the Illumina bcl2fastq 2.20.0.422 pipeline was used to generate the sequence data. The data generated here meet the AGRF quality standards	2 NT	Illumina	Australian Genome Research Facility	not provided	Sequencing by synthesis	16S rRNA
37	D39	scissors and forceps	cut	2019-04-02	25(27)	TRUE	0	meters	Host-associated	Animal	Animal distal gut	marine biome	animal-associated habitat	intestine environment	host-associated	Australia:Tasmania	23	months	UBERON:gastrointestinal system	UBERON:lumen of gut	UBERON:colon	Atlantic salmon	503	cm	Salmo salar	0039	8030	2.16	kg	healthy	-41.1848	Decimal degrees	adult	146.371	Decimal degrees	stored in RNAlater and freezer at -80C	FALSE	other	metagenome	female	256318	Salmonid gut microbiome	Image analysis was performed in real time by the MiSeq Control Software (MCS) v2.6.2.1 and Real Time Analysis (RTA) v1.18.54, running on the instrument computer. RTA performs real-time base calling on the MiSeq instrument computer. Then the Illumina bcl2fastq 2.20.0.422 pipeline was used to generate the sequence data. The data generated here meet the AGRF quality standards	2 NT	Illumina	Australian Genome Research Facility	not provided	Sequencing by synthesis	16S rRNA
38	D40	scissors and forceps	cut	2019-04-02	25(27)	TRUE	0	meters	Host-associated	Animal	Animal distal gut	marine biome	animal-associated habitat	intestine environment	host-associated	Australia:Tasmania	23	months	UBERON:gastrointestinal system	UBERON:lumen of gut	UBERON:colon	Atlantic salmon	528	cm	Salmo salar	0040	8030	1.71	kg	healthy	-41.1848	Decimal degrees	adult	146.371	Decimal degrees	stored in RNAlater and freezer at -80C	FALSE	other	metagenome	female	256318	Salmonid gut microbiome	Image analysis was performed in real time by the MiSeq Control Software (MCS) v2.6.2.1 and Real Time Analysis (RTA) v1.18.54, running on the instrument computer. RTA performs real-time base calling on the MiSeq instrument computer. Then the Illumina bcl2fastq 2.20.0.422 pipeline was used to generate the sequence data. The data generated here meet the AGRF quality standards	2 NT	Illumina	Australian Genome Research Facility	not provided	Sequencing by synthesis	16S rRNA
39	D42	scissors and forceps	cut	2019-04-02	25(27)	TRUE	0	meters	Host-associated	Animal	Animal distal gut	marine biome	animal-associated habitat	intestine environment	host-associated	Australia:Tasmania	23	months	UBERON:gastrointestinal system	UBERON:lumen of gut	UBERON:colon	Atlantic salmon	498	cm	Salmo salar	0042	8030	1.39	kg	healthy	-41.1848	Decimal degrees	adult	146.371	Decimal degrees	stored in RNAlater and freezer at -80C	FALSE	other	metagenome	female	256318	Salmonid gut microbiome	Image analysis was performed in real time by the MiSeq Control Software (MCS) v2.6.2.1 and Real Time Analysis (RTA) v1.18.54, running on the instrument computer. RTA performs real-time base calling on the MiSeq instrument computer. Then the Illumina bcl2fastq 2.20.0.422 pipeline was used to generate the sequence data. The data generated here meet the AGRF quality standards	2 NT	Illumina	Australian Genome Research Facility	not provided	Sequencing by synthesis	16S rRNA
40	D43	scissors and forceps	cut	2019-04-02	25(27)	TRUE	0	meters	Host-associated	Animal	Animal distal gut	marine biome	animal-associated habitat	intestine environment	host-associated	Australia:Tasmania	23	months	UBERON:gastrointestinal system	UBERON:lumen of gut	UBERON:colon	Atlantic salmon	531	cm	Salmo salar	0043	8030	1.87	kg	healthy	-41.1848	Decimal degrees	adult	146.371	Decimal degrees	stored in RNAlater and freezer at -80C	FALSE	other	metagenome	female	256318	Salmonid gut microbiome	Image analysis was performed in real time by the MiSeq Control Software (MCS) v2.6.2.1 and Real Time Analysis (RTA) v1.18.54, running on the instrument computer. RTA performs real-time base calling on the MiSeq instrument computer. Then the Illumina bcl2fastq 2.20.0.422 pipeline was used to generate the sequence data. The data generated here meet the AGRF quality standards	2 NT	Illumina	Australian Genome Research Facility	not provided	Sequencing by synthesis	16S rRNA
41	D44	scissors and forceps	cut	2019-04-02	25(27)	TRUE	0	meters	Host-associated	Animal	Animal distal gut	marine biome	animal-associated habitat	intestine environment	host-associated	Australia:Tasmania	23	months	UBERON:gastrointestinal system	UBERON:lumen of gut	UBERON:colon	Atlantic salmon	535	cm	Salmo salar	0044	8030	1.97	kg	healthy	-41.1848	Decimal degrees	adult	146.371	Decimal degrees	stored in RNAlater and freezer at -80C	FALSE	other	metagenome	female	256318	Salmonid gut microbiome	Image analysis was performed in real time by the MiSeq Control Software (MCS) v2.6.2.1 and Real Time Analysis (RTA) v1.18.54, running on the instrument computer. RTA performs real-time base calling on the MiSeq instrument computer. Then the Illumina bcl2fastq 2.20.0.422 pipeline was used to generate the sequence data. The data generated here meet the AGRF quality standards	2 NT	Illumina	Australian Genome Research Facility	not provided	Sequencing by synthesis	16S rRNA
42	D46	scissors and forceps	cut	2019-04-02	25(27)	TRUE	0	meters	Host-associated	Animal	Animal distal gut	marine biome	animal-associated habitat	intestine environment	host-associated	Australia:Tasmania	23	months	UBERON:gastrointestinal system	UBERON:lumen of gut	UBERON:colon	Atlantic salmon	510	cm	Salmo salar	0046	8030	1.77	kg	healthy	-41.1848	Decimal degrees	adult	146.371	Decimal degrees	stored in RNAlater and freezer at -80C	FALSE	other	metagenome	female	256318	Salmonid gut microbiome	Image analysis was performed in real time by the MiSeq Control Software (MCS) v2.6.2.1 and Real Time Analysis (RTA) v1.18.54, running on the instrument computer. RTA performs real-time base calling on the MiSeq instrument computer. Then the Illumina bcl2fastq 2.20.0.422 pipeline was used to generate the sequence data. The data generated here meet the AGRF quality standards	2 NT	Illumina	Australian Genome Research Facility	not provided	Sequencing by synthesis	16S rRNA
43	D47	scissors and forceps	cut	2019-04-03	26(28)	TRUE	0	meters	Host-associated	Animal	Animal distal gut	marine biome	animal-associated habitat	intestine environment	host-associated	Australia:Tasmania	23	months	UBERON:gastrointestinal system	UBERON:lumen of gut	UBERON:colon	Atlantic salmon	594	cm	Salmo salar	0047	8030	2.78	kg	healthy	-41.1848	Decimal degrees	adult	146.371	Decimal degrees	stored in RNAlater and freezer at -80C	FALSE	other	metagenome	female	256318	Salmonid gut microbiome	Image analysis was performed in real time by the MiSeq Control Software (MCS) v2.6.2.1 and Real Time Analysis (RTA) v1.18.54, running on the instrument computer. RTA performs real-time base calling on the MiSeq instrument computer. Then the Illumina bcl2fastq 2.20.0.422 pipeline was used to generate the sequence data. The data generated here meet the AGRF quality standards	2 NT	Illumina	Australian Genome Research Facility	not provided	Sequencing by synthesis	16S rRNA
44	D48	scissors and forceps	cut	2019-04-03	26(28)	TRUE	0	meters	Host-associated	Animal	Animal distal gut	marine biome	animal-associated habitat	intestine environment	host-associated	Australia:Tasmania	23	months	UBERON:gastrointestinal system	UBERON:lumen of gut	UBERON:colon	Atlantic salmon	615	cm	Salmo salar	0048	8030	3.27	kg	healthy	-41.1848	Decimal degrees	adult	146.371	Decimal degrees	stored in RNAlater and freezer at -80C	FALSE	other	metagenome	female	256318	Salmonid gut microbiome	Image analysis was performed in real time by the MiSeq Control Software (MCS) v2.6.2.1 and Real Time Analysis (RTA) v1.18.54, running on the instrument computer. RTA performs real-time base calling on the MiSeq instrument computer. Then the Illumina bcl2fastq 2.20.0.422 pipeline was used to generate the sequence data. The data generated here meet the AGRF quality standards	2 NT	Illumina	Australian Genome Research Facility	not provided	Sequencing by synthesis	16S rRNA
45	D49	scissors and forceps	cut	2019-04-03	26(28)	TRUE	0	meters	Host-associated	Animal	Animal distal gut	marine biome	animal-associated habitat	intestine environment	host-associated	Australia:Tasmania	23	months	UBERON:gastrointestinal system	UBERON:lumen of gut	UBERON:colon	Atlantic salmon	620	cm	Salmo salar	0049	8030	3.62	kg	healthy	-41.1848	Decimal degrees	adult	146.371	Decimal degrees	stored in RNAlater and freezer at -80C	FALSE	other	metagenome	female	256318	Salmonid gut microbiome	Image analysis was performed in real time by the MiSeq Control Software (MCS) v2.6.2.1 and Real Time Analysis (RTA) v1.18.54, running on the instrument computer. RTA performs real-time base calling on the MiSeq instrument computer. Then the Illumina bcl2fastq 2.20.0.422 pipeline was used to generate the sequence data. The data generated here meet the AGRF quality standards	2 NT	Illumina	Australian Genome Research Facility	not provided	Sequencing by synthesis	16S rRNA
46	D50	scissors and forceps	cut	2019-04-03	26(28)	TRUE	0	meters	Host-associated	Animal	Animal distal gut	marine biome	animal-associated habitat	intestine environment	host-associated	Australia:Tasmania	23	months	UBERON:gastrointestinal system	UBERON:lumen of gut	UBERON:colon	Atlantic salmon	572	cm	Salmo salar	0050	8030	2.49	kg	healthy	-41.1848	Decimal degrees	adult	146.371	Decimal degrees	stored in RNAlater and freezer at -80C	FALSE	other	metagenome	female	256318	Salmonid gut microbiome	Image analysis was performed in real time by the MiSeq Control Software (MCS) v2.6.2.1 and Real Time Analysis (RTA) v1.18.54, running on the instrument computer. RTA performs real-time base calling on the MiSeq instrument computer. Then the Illumina bcl2fastq 2.20.0.422 pipeline was used to generate the sequence data. The data generated here meet the AGRF quality standards	2 NT	Illumina	Australian Genome Research Facility	not provided	Sequencing by synthesis	16S rRNA
47	D51	scissors and forceps	cut	2019-04-03	26(28)	TRUE	0	meters	Host-associated	Animal	Animal distal gut	marine biome	animal-associated habitat	intestine environment	host-associated	Australia:Tasmania	23	months	UBERON:gastrointestinal system	UBERON:lumen of gut	UBERON:colon	Atlantic salmon	525	cm	Salmo salar	0051	8030	1.67	kg	healthy	-41.1848	Decimal degrees	adult	146.371	Decimal degrees	stored in RNAlater and freezer at -80C	FALSE	other	metagenome	female	256318	Salmonid gut microbiome	Image analysis was performed in real time by the MiSeq Control Software (MCS) v2.6.2.1 and Real Time Analysis (RTA) v1.18.54, running on the instrument computer. RTA performs real-time base calling on the MiSeq instrument computer. Then the Illumina bcl2fastq 2.20.0.422 pipeline was used to generate the sequence data. The data generated here meet the AGRF quality standards	2 NT	Illumina	Australian Genome Research Facility	not provided	Sequencing by synthesis	16S rRNA
48	D52	scissors and forceps	cut	2019-04-03	26(28)	TRUE	0	meters	Host-associated	Animal	Animal distal gut	marine biome	animal-associated habitat	intestine environment	host-associated	Australia:Tasmania	23	months	UBERON:gastrointestinal system	UBERON:lumen of gut	UBERON:colon	Atlantic salmon	559	cm	Salmo salar	0052	8030	2.34	kg	healthy	-41.1848	Decimal degrees	adult	146.371	Decimal degrees	stored in RNAlater and freezer at -80C	FALSE	other	metagenome	female	256318	Salmonid gut microbiome	Image analysis was performed in real time by the MiSeq Control Software (MCS) v2.6.2.1 and Real Time Analysis (RTA) v1.18.54, running on the instrument computer. RTA performs real-time base calling on the MiSeq instrument computer. Then the Illumina bcl2fastq 2.20.0.422 pipeline was used to generate the sequence data. The data generated here meet the AGRF quality standards	2 NT	Illumina	Australian Genome Research Facility	not provided	Sequencing by synthesis	16S rRNA
49	D53	scissors and forceps	cut	2019-04-03	26(28)	TRUE	0	meters	Host-associated	Animal	Animal distal gut	marine biome	animal-associated habitat	intestine environment	host-associated	Australia:Tasmania	23	months	UBERON:gastrointestinal system	UBERON:lumen of gut	UBERON:colon	Atlantic salmon	563	cm	Salmo salar	0053	8030	2.5	kg	healthy	-41.1848	Decimal degrees	adult	146.371	Decimal degrees	stored in RNAlater and freezer at -80C	FALSE	other	metagenome	female	256318	Salmonid gut microbiome	Image analysis was performed in real time by the MiSeq Control Software (MCS) v2.6.2.1 and Real Time Analysis (RTA) v1.18.54, running on the instrument computer. RTA performs real-time base calling on the MiSeq instrument computer. Then the Illumina bcl2fastq 2.20.0.422 pipeline was used to generate the sequence data. The data generated here meet the AGRF quality standards	2 NT	Illumina	Australian Genome Research Facility	not provided	Sequencing by synthesis	16S rRNA
50	D54	scissors and forceps	cut	2019-04-03	26(28)	TRUE	0	meters	Host-associated	Animal	Animal distal gut	marine biome	animal-associated habitat	intestine environment	host-associated	Australia:Tasmania	23	months	UBERON:gastrointestinal system	UBERON:lumen of gut	UBERON:colon	Atlantic salmon	600	cm	Salmo salar	0054	8030	3.02	kg	healthy	-41.1848	Decimal degrees	adult	146.371	Decimal degrees	stored in RNAlater and freezer at -80C	FALSE	other	metagenome	female	256318	Salmonid gut microbiome	Image analysis was performed in real time by the MiSeq Control Software (MCS) v2.6.2.1 and Real Time Analysis (RTA) v1.18.54, running on the instrument computer. RTA performs real-time base calling on the MiSeq instrument computer. Then the Illumina bcl2fastq 2.20.0.422 pipeline was used to generate the sequence data. The data generated here meet the AGRF quality standards	2 NT	Illumina	Australian Genome Research Facility	not provided	Sequencing by synthesis	16S rRNA
51	D55	scissors and forceps	cut	2019-04-03	26(28)	TRUE	0	meters	Host-associated	Animal	Animal distal gut	marine biome	animal-associated habitat	intestine environment	host-associated	Australia:Tasmania	23	months	UBERON:gastrointestinal system	UBERON:lumen of gut	UBERON:colon	Atlantic salmon	607	cm	Salmo salar	0055	8030	2.98	kg	healthy	-41.1848	Decimal degrees	adult	146.371	Decimal degrees	stored in RNAlater and freezer at -80C	FALSE	other	metagenome	female	256318	Salmonid gut microbiome	Image analysis was performed in real time by the MiSeq Control Software (MCS) v2.6.2.1 and Real Time Analysis (RTA) v1.18.54, running on the instrument computer. RTA performs real-time base calling on the MiSeq instrument computer. Then the Illumina bcl2fastq 2.20.0.422 pipeline was used to generate the sequence data. The data generated here meet the AGRF quality standards	2 NT	Illumina	Australian Genome Research Facility	not provided	Sequencing by synthesis	16S rRNA
52	D56	scissors and forceps	cut	2019-04-03	26(28)	TRUE	0	meters	Host-associated	Animal	Animal distal gut	marine biome	animal-associated habitat	intestine environment	host-associated	Australia:Tasmania	23	months	UBERON:gastrointestinal system	UBERON:lumen of gut	UBERON:colon	Atlantic salmon	533	cm	Salmo salar	0056	8030	2.06	kg	healthy	-41.1848	Decimal degrees	adult	146.371	Decimal degrees	stored in RNAlater and freezer at -80C	FALSE	other	metagenome	female	256318	Salmonid gut microbiome	Image analysis was performed in real time by the MiSeq Control Software (MCS) v2.6.2.1 and Real Time Analysis (RTA) v1.18.54, running on the instrument computer. RTA performs real-time base calling on the MiSeq instrument computer. Then the Illumina bcl2fastq 2.20.0.422 pipeline was used to generate the sequence data. The data generated here meet the AGRF quality standards	2 NT	Illumina	Australian Genome Research Facility	not provided	Sequencing by synthesis	16S rRNA
53	D57	scissors and forceps	cut	2019-04-03	26(28)	TRUE	0	meters	Host-associated	Animal	Animal distal gut	marine biome	animal-associated habitat	intestine environment	host-associated	Australia:Tasmania	23	months	UBERON:gastrointestinal system	UBERON:lumen of gut	UBERON:colon	Atlantic salmon	614	cm	Salmo salar	0057	8030	3.43	kg	healthy	-41.1848	Decimal degrees	adult	146.371	Decimal degrees	stored in RNAlater and freezer at -80C	FALSE	other	metagenome	female	256318	Salmonid gut microbiome	Image analysis was performed in real time by the MiSeq Control Software (MCS) v2.6.2.1 and Real Time Analysis (RTA) v1.18.54, running on the instrument computer. RTA performs real-time base calling on the MiSeq instrument computer. Then the Illumina bcl2fastq 2.20.0.422 pipeline was used to generate the sequence data. The data generated here meet the AGRF quality standards	2 NT	Illumina	Australian Genome Research Facility	not provided	Sequencing by synthesis	16S rRNA
54	D58	scissors and forceps	cut	2019-04-03	26(28)	TRUE	0	meters	Host-associated	Animal	Animal distal gut	marine biome	animal-associated habitat	intestine environment	host-associated	Australia:Tasmania	23	months	UBERON:gastrointestinal system	UBERON:lumen of gut	UBERON:colon	Atlantic salmon	547	cm	Salmo salar	0058	8030	2.31	kg	healthy	-41.1848	Decimal degrees	adult	146.371	Decimal degrees	stored in RNAlater and freezer at -80C	FALSE	other	metagenome	female	256318	Salmonid gut microbiome	Image analysis was performed in real time by the MiSeq Control Software (MCS) v2.6.2.1 and Real Time Analysis (RTA) v1.18.54, running on the instrument computer. RTA performs real-time base calling on the MiSeq instrument computer. Then the Illumina bcl2fastq 2.20.0.422 pipeline was used to generate the sequence data. The data generated here meet the AGRF quality standards	2 NT	Illumina	Australian Genome Research Facility	not provided	Sequencing by synthesis	16S rRNA
55	D59	scissors and forceps	cut	2019-04-03	26(28)	TRUE	0	meters	Host-associated	Animal	Animal distal gut	marine biome	animal-associated habitat	intestine environment	host-associated	Australia:Tasmania	23	months	UBERON:gastrointestinal system	UBERON:lumen of gut	UBERON:colon	Atlantic salmon	569	cm	Salmo salar	0059	8030	2.58	kg	healthy	-41.1848	Decimal degrees	adult	146.371	Decimal degrees	stored in RNAlater and freezer at -80C	FALSE	other	metagenome	female	256318	Salmonid gut microbiome	Image analysis was performed in real time by the MiSeq Control Software (MCS) v2.6.2.1 and Real Time Analysis (RTA) v1.18.54, running on the instrument computer. RTA performs real-time base calling on the MiSeq instrument computer. Then the Illumina bcl2fastq 2.20.0.422 pipeline was used to generate the sequence data. The data generated here meet the AGRF quality standards	2 NT	Illumina	Australian Genome Research Facility	not provided	Sequencing by synthesis	16S rRNA
56	D60	scissors and forceps	cut	2019-04-03	26(28)	TRUE	0	meters	Host-associated	Animal	Animal distal gut	marine biome	animal-associated habitat	intestine environment	host-associated	Australia:Tasmania	23	months	UBERON:gastrointestinal system	UBERON:lumen of gut	UBERON:colon	Atlantic salmon	573	cm	Salmo salar	0060	8030	2.54	kg	healthy	-41.1848	Decimal degrees	adult	146.371	Decimal degrees	stored in RNAlater and freezer at -80C	FALSE	other	metagenome	female	256318	Salmonid gut microbiome	Image analysis was performed in real time by the MiSeq Control Software (MCS) v2.6.2.1 and Real Time Analysis (RTA) v1.18.54, running on the instrument computer. RTA performs real-time base calling on the MiSeq instrument computer. Then the Illumina bcl2fastq 2.20.0.422 pipeline was used to generate the sequence data. The data generated here meet the AGRF quality standards	2 NT	Illumina	Australian Genome Research Facility	not provided	Sequencing by synthesis	16S rRNA
57	D61	scissors and forceps	cut	2019-04-03	26(28)	TRUE	0	meters	Host-associated	Animal	Animal distal gut	marine biome	animal-associated habitat	intestine environment	host-associated	Australia:Tasmania	23	months	UBERON:gastrointestinal system	UBERON:lumen of gut	UBERON:colon	Atlantic salmon	516	cm	Salmo salar	0061	8030	1.48	kg	healthy	-41.1848	Decimal degrees	adult	146.371	Decimal degrees	stored in RNAlater and freezer at -80C	FALSE	other	metagenome	female	256318	Salmonid gut microbiome	Image analysis was performed in real time by the MiSeq Control Software (MCS) v2.6.2.1 and Real Time Analysis (RTA) v1.18.54, running on the instrument computer. RTA performs real-time base calling on the MiSeq instrument computer. Then the Illumina bcl2fastq 2.20.0.422 pipeline was used to generate the sequence data. The data generated here meet the AGRF quality standards	2 NT	Illumina	Australian Genome Research Facility	not provided	Sequencing by synthesis	16S rRNA
58	D62	scissors and forceps	cut	2019-04-03	26(28)	TRUE	0	meters	Host-associated	Animal	Animal distal gut	marine biome	animal-associated habitat	intestine environment	host-associated	Australia:Tasmania	23	months	UBERON:gastrointestinal system	UBERON:lumen of gut	UBERON:colon	Atlantic salmon	609	cm	Salmo salar	0062	8030	2.82	kg	healthy	-41.1848	Decimal degrees	adult	146.371	Decimal degrees	stored in RNAlater and freezer at -80C	FALSE	other	metagenome	female	256318	Salmonid gut microbiome	Image analysis was performed in real time by the MiSeq Control Software (MCS) v2.6.2.1 and Real Time Analysis (RTA) v1.18.54, running on the instrument computer. RTA performs real-time base calling on the MiSeq instrument computer. Then the Illumina bcl2fastq 2.20.0.422 pipeline was used to generate the sequence data. The data generated here meet the AGRF quality standards	2 NT	Illumina	Australian Genome Research Facility	not provided	Sequencing by synthesis	16S rRNA
59	D63	scissors and forceps	cut	2019-04-03	26(28)	TRUE	0	meters	Host-associated	Animal	Animal distal gut	marine biome	animal-associated habitat	intestine environment	host-associated	Australia:Tasmania	23	months	UBERON:gastrointestinal system	UBERON:lumen of gut	UBERON:colon	Atlantic salmon	555	cm	Salmo salar	0063	8030	2.33	kg	healthy	-41.1848	Decimal degrees	adult	146.371	Decimal degrees	stored in RNAlater and freezer at -80C	FALSE	other	metagenome	female	256318	Salmonid gut microbiome	Image analysis was performed in real time by the MiSeq Control Software (MCS) v2.6.2.1 and Real Time Analysis (RTA) v1.18.54, running on the instrument computer. RTA performs real-time base calling on the MiSeq instrument computer. Then the Illumina bcl2fastq 2.20.0.422 pipeline was used to generate the sequence data. The data generated here meet the AGRF quality standards	2 NT	Illumina	Australian Genome Research Facility	not provided	Sequencing by synthesis	16S rRNA
60	D64	scissors and forceps	cut	2019-04-03	26(28)	TRUE	0	meters	Host-associated	Animal	Animal distal gut	marine biome	animal-associated habitat	intestine environment	host-associated	Australia:Tasmania	23	months	UBERON:gastrointestinal system	UBERON:lumen of gut	UBERON:colon	Atlantic salmon	590	cm	Salmo salar	0064	8030	3.22	kg	healthy	-41.1848	Decimal degrees	adult	146.371	Decimal degrees	stored in RNAlater and freezer at -80C	FALSE	other	metagenome	female	256318	Salmonid gut microbiome	Image analysis was performed in real time by the MiSeq Control Software (MCS) v2.6.2.1 and Real Time Analysis (RTA) v1.18.54, running on the instrument computer. RTA performs real-time base calling on the MiSeq instrument computer. Then the Illumina bcl2fastq 2.20.0.422 pipeline was used to generate the sequence data. The data generated here meet the AGRF quality standards	2 NT	Illumina	Australian Genome Research Facility	not provided	Sequencing by synthesis	16S rRNA
61	D65	scissors and forceps	cut	2019-04-03	26(28)	TRUE	0	meters	Host-associated	Animal	Animal distal gut	marine biome	animal-associated habitat	intestine environment	host-associated	Australia:Tasmania	23	months	UBERON:gastrointestinal system	UBERON:lumen of gut	UBERON:colon	Atlantic salmon	580	cm	Salmo salar	0065	8030	2.34	kg	healthy	-41.1848	Decimal degrees	adult	146.371	Decimal degrees	stored in RNAlater and freezer at -80C	FALSE	other	metagenome	female	256318	Salmonid gut microbiome	Image analysis was performed in real time by the MiSeq Control Software (MCS) v2.6.2.1 and Real Time Analysis (RTA) v1.18.54, running on the instrument computer. RTA performs real-time base calling on the MiSeq instrument computer. Then the Illumina bcl2fastq 2.20.0.422 pipeline was used to generate the sequence data. The data generated here meet the AGRF quality standards	2 NT	Illumina	Australian Genome Research Facility	not provided	Sequencing by synthesis	16S rRNA
62	D66	scissors and forceps	cut	2019-04-03	26(28)	TRUE	0	meters	Host-associated	Animal	Animal distal gut	marine biome	animal-associated habitat	intestine environment	host-associated	Australia:Tasmania	23	months	UBERON:gastrointestinal system	UBERON:lumen of gut	UBERON:colon	Atlantic salmon	526	cm	Salmo salar	0066	8030	2.28	kg	healthy	-41.1848	Decimal degrees	adult	146.371	Decimal degrees	stored in RNAlater and freezer at -80C	FALSE	other	metagenome	female	256318	Salmonid gut microbiome	Image analysis was performed in real time by the MiSeq Control Software (MCS) v2.6.2.1 and Real Time Analysis (RTA) v1.18.54, running on the instrument computer. RTA performs real-time base calling on the MiSeq instrument computer. Then the Illumina bcl2fastq 2.20.0.422 pipeline was used to generate the sequence data. The data generated here meet the AGRF quality standards	2 NT	Illumina	Australian Genome Research Facility	not provided	Sequencing by synthesis	16S rRNA
63	D67	scissors and forceps	cut	2019-04-03	26(28)	TRUE	0	meters	Host-associated	Animal	Animal distal gut	marine biome	animal-associated habitat	intestine environment	host-associated	Australia:Tasmania	23	months	UBERON:gastrointestinal system	UBERON:lumen of gut	UBERON:colon	Atlantic salmon	530	cm	Salmo salar	0067	8030	1.86	kg	healthy	-41.1848	Decimal degrees	adult	146.371	Decimal degrees	stored in RNAlater and freezer at -80C	FALSE	other	metagenome	female	256318	Salmonid gut microbiome	Image analysis was performed in real time by the MiSeq Control Software (MCS) v2.6.2.1 and Real Time Analysis (RTA) v1.18.54, running on the instrument computer. RTA performs real-time base calling on the MiSeq instrument computer. Then the Illumina bcl2fastq 2.20.0.422 pipeline was used to generate the sequence data. The data generated here meet the AGRF quality standards	2 NT	Illumina	Australian Genome Research Facility	not provided	Sequencing by synthesis	16S rRNA
64	D68	scissors and forceps	cut	2019-04-03	26(28)	TRUE	0	meters	Host-associated	Animal	Animal distal gut	marine biome	animal-associated habitat	intestine environment	host-associated	Australia:Tasmania	23	months	UBERON:gastrointestinal system	UBERON:lumen of gut	UBERON:colon	Atlantic salmon	520	cm	Salmo salar	0068	8030	1.75	kg	healthy	-41.1848	Decimal degrees	adult	146.371	Decimal degrees	stored in RNAlater and freezer at -80C	FALSE	other	metagenome	female	256318	Salmonid gut microbiome	Image analysis was performed in real time by the MiSeq Control Software (MCS) v2.6.2.1 and Real Time Analysis (RTA) v1.18.54, running on the instrument computer. RTA performs real-time base calling on the MiSeq instrument computer. Then the Illumina bcl2fastq 2.20.0.422 pipeline was used to generate the sequence data. The data generated here meet the AGRF quality standards	2 NT	Illumina	Australian Genome Research Facility	not provided	Sequencing by synthesis	16S rRNA
65	D69	scissors and forceps	cut	2019-04-03	26(28)	TRUE	0	meters	Host-associated	Animal	Animal distal gut	marine biome	animal-associated habitat	intestine environment	host-associated	Australia:Tasmania	23	months	UBERON:gastrointestinal system	UBERON:lumen of gut	UBERON:colon	Atlantic salmon	540	cm	Salmo salar	0069	8030	2.09	kg	healthy	-41.1848	Decimal degrees	adult	146.371	Decimal degrees	stored in RNAlater and freezer at -80C	FALSE	other	metagenome	female	256318	Salmonid gut microbiome	Image analysis was performed in real time by the MiSeq Control Software (MCS) v2.6.2.1 and Real Time Analysis (RTA) v1.18.54, running on the instrument computer. RTA performs real-time base calling on the MiSeq instrument computer. Then the Illumina bcl2fastq 2.20.0.422 pipeline was used to generate the sequence data. The data generated here meet the AGRF quality standards	2 NT	Illumina	Australian Genome Research Facility	not provided	Sequencing by synthesis	16S rRNA
66	D70	scissors and forceps	cut	2019-04-03	26(28)	TRUE	0	meters	Host-associated	Animal	Animal distal gut	marine biome	animal-associated habitat	intestine environment	host-associated	Australia:Tasmania	23	months	UBERON:gastrointestinal system	UBERON:lumen of gut	UBERON:colon	Atlantic salmon	538	cm	Salmo salar	0070	8030	2.35	kg	healthy	-41.1848	Decimal degrees	adult	146.371	Decimal degrees	stored in RNAlater and freezer at -80C	FALSE	other	metagenome	female	256318	Salmonid gut microbiome	Image analysis was performed in real time by the MiSeq Control Software (MCS) v2.6.2.1 and Real Time Analysis (RTA) v1.18.54, running on the instrument computer. RTA performs real-time base calling on the MiSeq instrument computer. Then the Illumina bcl2fastq 2.20.0.422 pipeline was used to generate the sequence data. The data generated here meet the AGRF quality standards	2 NT	Illumina	Australian Genome Research Facility	not provided	Sequencing by synthesis	16S rRNA
67	D71	scissors and forceps	cut	2019-04-03	26(28)	TRUE	0	meters	Host-associated	Animal	Animal distal gut	marine biome	animal-associated habitat	intestine environment	host-associated	Australia:Tasmania	23	months	UBERON:gastrointestinal system	UBERON:lumen of gut	UBERON:colon	Atlantic salmon	610	cm	Salmo salar	0071	8030	3.46	kg	healthy	-41.1848	Decimal degrees	adult	146.371	Decimal degrees	stored in RNAlater and freezer at -80C	FALSE	other	metagenome	female	256318	Salmonid gut microbiome	Image analysis was performed in real time by the MiSeq Control Software (MCS) v2.6.2.1 and Real Time Analysis (RTA) v1.18.54, running on the instrument computer. RTA performs real-time base calling on the MiSeq instrument computer. Then the Illumina bcl2fastq 2.20.0.422 pipeline was used to generate the sequence data. The data generated here meet the AGRF quality standards	2 NT	Illumina	Australian Genome Research Facility	not provided	Sequencing by synthesis	16S rRNA
68	D72	scissors and forceps	cut	2019-04-03	26(28)	TRUE	0	meters	Host-associated	Animal	Animal distal gut	marine biome	animal-associated habitat	intestine environment	host-associated	Australia:Tasmania	23	months	UBERON:gastrointestinal system	UBERON:lumen of gut	UBERON:colon	Atlantic salmon	506	cm	Salmo salar	0072	8030	1.6	kg	healthy	-41.1848	Decimal degrees	adult	146.371	Decimal degrees	stored in RNAlater and freezer at -80C	FALSE	other	metagenome	female	256318	Salmonid gut microbiome	Image analysis was performed in real time by the MiSeq Control Software (MCS) v2.6.2.1 and Real Time Analysis (RTA) v1.18.54, running on the instrument computer. RTA performs real-time base calling on the MiSeq instrument computer. Then the Illumina bcl2fastq 2.20.0.422 pipeline was used to generate the sequence data. The data generated here meet the AGRF quality standards	2 NT	Illumina	Australian Genome Research Facility	not provided	Sequencing by synthesis	16S rRNA
69	D73	scissors and forceps	cut	2019-04-03	26(28)	TRUE	0	meters	Host-associated	Animal	Animal distal gut	marine biome	animal-associated habitat	intestine environment	host-associated	Australia:Tasmania	23	months	UBERON:gastrointestinal system	UBERON:lumen of gut	UBERON:colon	Atlantic salmon	588	cm	Salmo salar	0073	8030	2.55	kg	healthy	-41.1848	Decimal degrees	adult	146.371	Decimal degrees	stored in RNAlater and freezer at -80C	FALSE	other	metagenome	female	256318	Salmonid gut microbiome	Image analysis was performed in real time by the MiSeq Control Software (MCS) v2.6.2.1 and Real Time Analysis (RTA) v1.18.54, running on the instrument computer. RTA performs real-time base calling on the MiSeq instrument computer. Then the Illumina bcl2fastq 2.20.0.422 pipeline was used to generate the sequence data. The data generated here meet the AGRF quality standards	2 NT	Illumina	Australian Genome Research Facility	not provided	Sequencing by synthesis	16S rRNA
70	D74	scissors and forceps	cut	2019-04-03	26(28)	TRUE	0	meters	Host-associated	Animal	Animal distal gut	marine biome	animal-associated habitat	intestine environment	host-associated	Australia:Tasmania	23	months	UBERON:gastrointestinal system	UBERON:lumen of gut	UBERON:colon	Atlantic salmon	572	cm	Salmo salar	0074	8030	2.36	kg	healthy	-41.1848	Decimal degrees	adult	146.371	Decimal degrees	stored in RNAlater and freezer at -80C	FALSE	other	metagenome	female	256318	Salmonid gut microbiome	Image analysis was performed in real time by the MiSeq Control Software (MCS) v2.6.2.1 and Real Time Analysis (RTA) v1.18.54, running on the instrument computer. RTA performs real-time base calling on the MiSeq instrument computer. Then the Illumina bcl2fastq 2.20.0.422 pipeline was used to generate the sequence data. The data generated here meet the AGRF quality standards	2 NT	Illumina	Australian Genome Research Facility	not provided	Sequencing by synthesis	16S rRNA
71	D75	scissors and forceps	cut	2019-04-03	26(28)	TRUE	0	meters	Host-associated	Animal	Animal distal gut	marine biome	animal-associated habitat	intestine environment	host-associated	Australia:Tasmania	23	months	UBERON:gastrointestinal system	UBERON:lumen of gut	UBERON:colon	Atlantic salmon	586	cm	Salmo salar	0075	8030	2.8	kg	healthy	-41.1848	Decimal degrees	adult	146.371	Decimal degrees	stored in RNAlater and freezer at -80C	FALSE	other	metagenome	female	256318	Salmonid gut microbiome	Image analysis was performed in real time by the MiSeq Control Software (MCS) v2.6.2.1 and Real Time Analysis (RTA) v1.18.54, running on the instrument computer. RTA performs real-time base calling on the MiSeq instrument computer. Then the Illumina bcl2fastq 2.20.0.422 pipeline was used to generate the sequence data. The data generated here meet the AGRF quality standards	2 NT	Illumina	Australian Genome Research Facility	not provided	Sequencing by synthesis	16S rRNA
72	D76	scissors and forceps	cut	2019-04-03	26(28)	TRUE	0	meters	Host-associated	Animal	Animal distal gut	marine biome	animal-associated habitat	intestine environment	host-associated	Australia:Tasmania	23	months	UBERON:gastrointestinal system	UBERON:lumen of gut	UBERON:colon	Atlantic salmon	516	cm	Salmo salar	0076	8030	1.38	kg	healthy	-41.1848	Decimal degrees	adult	146.371	Decimal degrees	stored in RNAlater and freezer at -80C	FALSE	other	metagenome	female	256318	Salmonid gut microbiome	Image analysis was performed in real time by the MiSeq Control Software (MCS) v2.6.2.1 and Real Time Analysis (RTA) v1.18.54, running on the instrument computer. RTA performs real-time base calling on the MiSeq instrument computer. Then the Illumina bcl2fastq 2.20.0.422 pipeline was used to generate the sequence data. The data generated here meet the AGRF quality standards	2 NT	Illumina	Australian Genome Research Facility	not provided	Sequencing by synthesis	16S rRNA
73	D77	scissors and forceps	cut	2019-04-03	26(28)	TRUE	0	meters	Host-associated	Animal	Animal distal gut	marine biome	animal-associated habitat	intestine environment	host-associated	Australia:Tasmania	23	months	UBERON:gastrointestinal system	UBERON:lumen of gut	UBERON:colon	Atlantic salmon	480	cm	Salmo salar	0077	8030	1.2	kg	healthy	-41.1848	Decimal degrees	adult	146.371	Decimal degrees	stored in RNAlater and freezer at -80C	FALSE	other	metagenome	female	256318	Salmonid gut microbiome	Image analysis was performed in real time by the MiSeq Control Software (MCS) v2.6.2.1 and Real Time Analysis (RTA) v1.18.54, running on the instrument computer. RTA performs real-time base calling on the MiSeq instrument computer. Then the Illumina bcl2fastq 2.20.0.422 pipeline was used to generate the sequence data. The data generated here meet the AGRF quality standards	2 NT	Illumina	Australian Genome Research Facility	not provided	Sequencing by synthesis	16S rRNA
74	D78	scissors and forceps	cut	2019-04-03	26(28)	TRUE	0	meters	Host-associated	Animal	Animal distal gut	marine biome	animal-associated habitat	intestine environment	host-associated	Australia:Tasmania	23	months	UBERON:gastrointestinal system	UBERON:lumen of gut	UBERON:colon	Atlantic salmon	572	cm	Salmo salar	0078	8030	2.59	kg	healthy	-41.1848	Decimal degrees	adult	146.371	Decimal degrees	stored in RNAlater and freezer at -80C	FALSE	other	metagenome	female	256318	Salmonid gut microbiome	Image analysis was performed in real time by the MiSeq Control Software (MCS) v2.6.2.1 and Real Time Analysis (RTA) v1.18.54, running on the instrument computer. RTA performs real-time base calling on the MiSeq instrument computer. Then the Illumina bcl2fastq 2.20.0.422 pipeline was used to generate the sequence data. The data generated here meet the AGRF quality standards	2 NT	Illumina	Australian Genome Research Facility	not provided	Sequencing by synthesis	16S rRNA
75	D79	scissors and forceps	cut	2019-04-03	26(28)	TRUE	0	meters	Host-associated	Animal	Animal distal gut	marine biome	animal-associated habitat	intestine environment	host-associated	Australia:Tasmania	23	months	UBERON:gastrointestinal system	UBERON:lumen of gut	UBERON:colon	Atlantic salmon	590	cm	Salmo salar	0079	8030	2.92	kg	healthy	-41.1848	Decimal degrees	adult	146.371	Decimal degrees	stored in RNAlater and freezer at -80C	FALSE	other	metagenome	female	256318	Salmonid gut microbiome	Image analysis was performed in real time by the MiSeq Control Software (MCS) v2.6.2.1 and Real Time Analysis (RTA) v1.18.54, running on the instrument computer. RTA performs real-time base calling on the MiSeq instrument computer. Then the Illumina bcl2fastq 2.20.0.422 pipeline was used to generate the sequence data. The data generated here meet the AGRF quality standards	2 NT	Illumina	Australian Genome Research Facility	not provided	Sequencing by synthesis	16S rRNA
76	D80	scissors and forceps	cut	2019-04-03	26(28)	TRUE	0	meters	Host-associated	Animal	Animal distal gut	marine biome	animal-associated habitat	intestine environment	host-associated	Australia:Tasmania	23	months	UBERON:gastrointestinal system	UBERON:lumen of gut	UBERON:colon	Atlantic salmon	539	cm	Salmo salar	0080	8030	1.93	kg	healthy	-41.1848	Decimal degrees	adult	146.371	Decimal degrees	stored in RNAlater and freezer at -80C	FALSE	other	metagenome	female	256318	Salmonid gut microbiome	Image analysis was performed in real time by the MiSeq Control Software (MCS) v2.6.2.1 and Real Time Analysis (RTA) v1.18.54, running on the instrument computer. RTA performs real-time base calling on the MiSeq instrument computer. Then the Illumina bcl2fastq 2.20.0.422 pipeline was used to generate the sequence data. The data generated here meet the AGRF quality standards	2 NT	Illumina	Australian Genome Research Facility	not provided	Sequencing by synthesis	16S rRNA
77	D81	scissors and forceps	cut	2019-04-03	26(28)	TRUE	0	meters	Host-associated	Animal	Animal distal gut	marine biome	animal-associated habitat	intestine environment	host-associated	Australia:Tasmania	23	months	UBERON:gastrointestinal system	UBERON:lumen of gut	UBERON:colon	Atlantic salmon	540	cm	Salmo salar	0081	8030	1.97	kg	healthy	-41.1848	Decimal degrees	adult	146.371	Decimal degrees	stored in RNAlater and freezer at -80C	FALSE	other	metagenome	female	256318	Salmonid gut microbiome	Image analysis was performed in real time by the MiSeq Control Software (MCS) v2.6.2.1 and Real Time Analysis (RTA) v1.18.54, running on the instrument computer. RTA performs real-time base calling on the MiSeq instrument computer. Then the Illumina bcl2fastq 2.20.0.422 pipeline was used to generate the sequence data. The data generated here meet the AGRF quality standards	2 NT	Illumina	Australian Genome Research Facility	not provided	Sequencing by synthesis	16S rRNA
78	D82	scissors and forceps	cut	2019-04-03	26(28)	TRUE	0	meters	Host-associated	Animal	Animal distal gut	marine biome	animal-associated habitat	intestine environment	host-associated	Australia:Tasmania	23	months	UBERON:gastrointestinal system	UBERON:lumen of gut	UBERON:colon	Atlantic salmon	548	cm	Salmo salar	0082	8030	2.24	kg	healthy	-41.1848	Decimal degrees	adult	146.371	Decimal degrees	stored in RNAlater and freezer at -80C	FALSE	other	metagenome	female	256318	Salmonid gut microbiome	Image analysis was performed in real time by the MiSeq Control Software (MCS) v2.6.2.1 and Real Time Analysis (RTA) v1.18.54, running on the instrument computer. RTA performs real-time base calling on the MiSeq instrument computer. Then the Illumina bcl2fastq 2.20.0.422 pipeline was used to generate the sequence data. The data generated here meet the AGRF quality standards	2 NT	Illumina	Australian Genome Research Facility	not provided	Sequencing by synthesis	16S rRNA
79	D83	scissors and forceps	cut	2019-04-03	26(28)	TRUE	0	meters	Host-associated	Animal	Animal distal gut	marine biome	animal-associated habitat	intestine environment	host-associated	Australia:Tasmania	23	months	UBERON:gastrointestinal system	UBERON:lumen of gut	UBERON:colon	Atlantic salmon	552	cm	Salmo salar	0083	8030	1.97	kg	healthy	-41.1848	Decimal degrees	adult	146.371	Decimal degrees	stored in RNAlater and freezer at -80C	FALSE	other	metagenome	female	256318	Salmonid gut microbiome	Image analysis was performed in real time by the MiSeq Control Software (MCS) v2.6.2.1 and Real Time Analysis (RTA) v1.18.54, running on the instrument computer. RTA performs real-time base calling on the MiSeq instrument computer. Then the Illumina bcl2fastq 2.20.0.422 pipeline was used to generate the sequence data. The data generated here meet the AGRF quality standards	2 NT	Illumina	Australian Genome Research Facility	not provided	Sequencing by synthesis	16S rRNA
80	D84	scissors and forceps	cut	2019-04-03	26(28)	TRUE	0	meters	Host-associated	Animal	Animal distal gut	marine biome	animal-associated habitat	intestine environment	host-associated	Australia:Tasmania	23	months	UBERON:gastrointestinal system	UBERON:lumen of gut	UBERON:colon	Atlantic salmon	589	cm	Salmo salar	0084	8030	2.37	kg	healthy	-41.1848	Decimal degrees	adult	146.371	Decimal degrees	stored in RNAlater and freezer at -80C	FALSE	other	metagenome	female	256318	Salmonid gut microbiome	Image analysis was performed in real time by the MiSeq Control Software (MCS) v2.6.2.1 and Real Time Analysis (RTA) v1.18.54, running on the instrument computer. RTA performs real-time base calling on the MiSeq instrument computer. Then the Illumina bcl2fastq 2.20.0.422 pipeline was used to generate the sequence data. The data generated here meet the AGRF quality standards	2 NT	Illumina	Australian Genome Research Facility	not provided	Sequencing by synthesis	16S rRNA
81	D85	scissors and forceps	cut	2019-04-03	26(28)	TRUE	0	meters	Host-associated	Animal	Animal distal gut	marine biome	animal-associated habitat	intestine environment	host-associated	Australia:Tasmania	23	months	UBERON:gastrointestinal system	UBERON:lumen of gut	UBERON:colon	Atlantic salmon	550	cm	Salmo salar	0085	8030	2.85	kg	healthy	-41.1848	Decimal degrees	adult	146.371	Decimal degrees	stored in RNAlater and freezer at -80C	FALSE	other	metagenome	female	256318	Salmonid gut microbiome	Image analysis was performed in real time by the MiSeq Control Software (MCS) v2.6.2.1 and Real Time Analysis (RTA) v1.18.54, running on the instrument computer. RTA performs real-time base calling on the MiSeq instrument computer. Then the Illumina bcl2fastq 2.20.0.422 pipeline was used to generate the sequence data. The data generated here meet the AGRF quality standards	2 NT	Illumina	Australian Genome Research Facility	not provided	Sequencing by synthesis	16S rRNA
82	D86	scissors and forceps	cut	2019-04-03	26(28)	TRUE	0	meters	Host-associated	Animal	Animal distal gut	marine biome	animal-associated habitat	intestine environment	host-associated	Australia:Tasmania	23	months	UBERON:gastrointestinal system	UBERON:lumen of gut	UBERON:colon	Atlantic salmon	549	cm	Salmo salar	0086	8030	2.38	kg	healthy	-41.1848	Decimal degrees	adult	146.371	Decimal degrees	stored in RNAlater and freezer at -80C	FALSE	other	metagenome	female	256318	Salmonid gut microbiome	Image analysis was performed in real time by the MiSeq Control Software (MCS) v2.6.2.1 and Real Time Analysis (RTA) v1.18.54, running on the instrument computer. RTA performs real-time base calling on the MiSeq instrument computer. Then the Illumina bcl2fastq 2.20.0.422 pipeline was used to generate the sequence data. The data generated here meet the AGRF quality standards	2 NT	Illumina	Australian Genome Research Facility	not provided	Sequencing by synthesis	16S rRNA
83	D87	scissors and forceps	cut	2019-04-03	26(28)	TRUE	0	meters	Host-associated	Animal	Animal distal gut	marine biome	animal-associated habitat	intestine environment	host-associated	Australia:Tasmania	23	months	UBERON:gastrointestinal system	UBERON:lumen of gut	UBERON:colon	Atlantic salmon	526	cm	Salmo salar	0087	8030	1.81	kg	healthy	-41.1848	Decimal degrees	adult	146.371	Decimal degrees	stored in RNAlater and freezer at -80C	FALSE	other	metagenome	female	256318	Salmonid gut microbiome	Image analysis was performed in real time by the MiSeq Control Software (MCS) v2.6.2.1 and Real Time Analysis (RTA) v1.18.54, running on the instrument computer. RTA performs real-time base calling on the MiSeq instrument computer. Then the Illumina bcl2fastq 2.20.0.422 pipeline was used to generate the sequence data. The data generated here meet the AGRF quality standards	2 NT	Illumina	Australian Genome Research Facility	not provided	Sequencing by synthesis	16S rRNA
84	D88	scissors and forceps	cut	2019-04-03	26(28)	TRUE	0	meters	Host-associated	Animal	Animal distal gut	marine biome	animal-associated habitat	intestine environment	host-associated	Australia:Tasmania	23	months	UBERON:gastrointestinal system	UBERON:lumen of gut	UBERON:colon	Atlantic salmon	574	cm	Salmo salar	0088	8030	2.32	kg	healthy	-41.1848	Decimal degrees	adult	146.371	Decimal degrees	stored in RNAlater and freezer at -80C	FALSE	other	metagenome	female	256318	Salmonid gut microbiome	Image analysis was performed in real time by the MiSeq Control Software (MCS) v2.6.2.1 and Real Time Analysis (RTA) v1.18.54, running on the instrument computer. RTA performs real-time base calling on the MiSeq instrument computer. Then the Illumina bcl2fastq 2.20.0.422 pipeline was used to generate the sequence data. The data generated here meet the AGRF quality standards	2 NT	Illumina	Australian Genome Research Facility	not provided	Sequencing by synthesis	16S rRNA
85	D89	scissors and forceps	cut	2019-04-03	26(28)	TRUE	0	meters	Host-associated	Animal	Animal distal gut	marine biome	animal-associated habitat	intestine environment	host-associated	Australia:Tasmania	23	months	UBERON:gastrointestinal system	UBERON:lumen of gut	UBERON:colon	Atlantic salmon	561	cm	Salmo salar	0089	8030	2.3	kg	healthy	-41.1848	Decimal degrees	adult	146.371	Decimal degrees	stored in RNAlater and freezer at -80C	FALSE	other	metagenome	female	256318	Salmonid gut microbiome	Image analysis was performed in real time by the MiSeq Control Software (MCS) v2.6.2.1 and Real Time Analysis (RTA) v1.18.54, running on the instrument computer. RTA performs real-time base calling on the MiSeq instrument computer. Then the Illumina bcl2fastq 2.20.0.422 pipeline was used to generate the sequence data. The data generated here meet the AGRF quality standards	2 NT	Illumina	Australian Genome Research Facility	not provided	Sequencing by synthesis	16S rRNA
86	D90	scissors and forceps	cut	2019-04-03	26(28)	TRUE	0	meters	Host-associated	Animal	Animal distal gut	marine biome	animal-associated habitat	intestine environment	host-associated	Australia:Tasmania	23	months	UBERON:gastrointestinal system	UBERON:lumen of gut	UBERON:colon	Atlantic salmon	553	cm	Salmo salar	0090	8030	2.35	kg	healthy	-41.1848	Decimal degrees	adult	146.371	Decimal degrees	stored in RNAlater and freezer at -80C	FALSE	other	metagenome	female	256318	Salmonid gut microbiome	Image analysis was performed in real time by the MiSeq Control Software (MCS) v2.6.2.1 and Real Time Analysis (RTA) v1.18.54, running on the instrument computer. RTA performs real-time base calling on the MiSeq instrument computer. Then the Illumina bcl2fastq 2.20.0.422 pipeline was used to generate the sequence data. The data generated here meet the AGRF quality standards	2 NT	Illumina	Australian Genome Research Facility	not provided	Sequencing by synthesis	16S rRNA
87	D91	scissors and forceps	cut	2019-04-03	26(28)	TRUE	0	meters	Host-associated	Animal	Animal distal gut	marine biome	animal-associated habitat	intestine environment	host-associated	Australia:Tasmania	23	months	UBERON:gastrointestinal system	UBERON:lumen of gut	UBERON:colon	Atlantic salmon	545	cm	Salmo salar	0091	8030	1.96	kg	healthy	-41.1848	Decimal degrees	adult	146.371	Decimal degrees	stored in RNAlater and freezer at -80C	FALSE	other	metagenome	female	256318	Salmonid gut microbiome	Image analysis was performed in real time by the MiSeq Control Software (MCS) v2.6.2.1 and Real Time Analysis (RTA) v1.18.54, running on the instrument computer. RTA performs real-time base calling on the MiSeq instrument computer. Then the Illumina bcl2fastq 2.20.0.422 pipeline was used to generate the sequence data. The data generated here meet the AGRF quality standards	2 NT	Illumina	Australian Genome Research Facility	not provided	Sequencing by synthesis	16S rRNA
88	D92	scissors and forceps	cut	2019-04-03	26(28)	TRUE	0	meters	Host-associated	Animal	Animal distal gut	marine biome	animal-associated habitat	intestine environment	host-associated	Australia:Tasmania	23	months	UBERON:gastrointestinal system	UBERON:lumen of gut	UBERON:colon	Atlantic salmon	534	cm	Salmo salar	0092	8030	1.77	kg	healthy	-41.1848	Decimal degrees	adult	146.371	Decimal degrees	stored in RNAlater and freezer at -80C	FALSE	other	metagenome	female	256318	Salmonid gut microbiome	Image analysis was performed in real time by the MiSeq Control Software (MCS) v2.6.2.1 and Real Time Analysis (RTA) v1.18.54, running on the instrument computer. RTA performs real-time base calling on the MiSeq instrument computer. Then the Illumina bcl2fastq 2.20.0.422 pipeline was used to generate the sequence data. The data generated here meet the AGRF quality standards	2 NT	Illumina	Australian Genome Research Facility	not provided	Sequencing by synthesis	16S rRNA
89	D93	scissors and forceps	cut	2019-04-03	26(28)	TRUE	0	meters	Host-associated	Animal	Animal distal gut	marine biome	animal-associated habitat	intestine environment	host-associated	Australia:Tasmania	23	months	UBERON:gastrointestinal system	UBERON:lumen of gut	UBERON:colon	Atlantic salmon	575	cm	Salmo salar	0093	8030	2.82	kg	healthy	-41.1848	Decimal degrees	adult	146.371	Decimal degrees	stored in RNAlater and freezer at -80C	FALSE	other	metagenome	female	256318	Salmonid gut microbiome	Image analysis was performed in real time by the MiSeq Control Software (MCS) v2.6.2.1 and Real Time Analysis (RTA) v1.18.54, running on the instrument computer. RTA performs real-time base calling on the MiSeq instrument computer. Then the Illumina bcl2fastq 2.20.0.422 pipeline was used to generate the sequence data. The data generated here meet the AGRF quality standards	2 NT	Illumina	Australian Genome Research Facility	not provided	Sequencing by synthesis	16S rRNA
90	D94	scissors and forceps	cut	2019-04-03	26(28)	TRUE	0	meters	Host-associated	Animal	Animal distal gut	marine biome	animal-associated habitat	intestine environment	host-associated	Australia:Tasmania	23	months	UBERON:gastrointestinal system	UBERON:lumen of gut	UBERON:colon	Atlantic salmon	534	cm	Salmo salar	0094	8030	2.05	kg	healthy	-41.1848	Decimal degrees	adult	146.371	Decimal degrees	stored in RNAlater and freezer at -80C	FALSE	other	metagenome	female	256318	Salmonid gut microbiome	Image analysis was performed in real time by the MiSeq Control Software (MCS) v2.6.2.1 and Real Time Analysis (RTA) v1.18.54, running on the instrument computer. RTA performs real-time base calling on the MiSeq instrument computer. Then the Illumina bcl2fastq 2.20.0.422 pipeline was used to generate the sequence data. The data generated here meet the AGRF quality standards	2 NT	Illumina	Australian Genome Research Facility	not provided	Sequencing by synthesis	16S rRNA
91	D95	scissors and forceps	cut	2019-04-03	26(28)	TRUE	0	meters	Host-associated	Animal	Animal distal gut	marine biome	animal-associated habitat	intestine environment	host-associated	Australia:Tasmania	23	months	UBERON:gastrointestinal system	UBERON:lumen of gut	UBERON:colon	Atlantic salmon	581	cm	Salmo salar	0095	8030	2.26	kg	healthy	-41.1848	Decimal degrees	adult	146.371	Decimal degrees	stored in RNAlater and freezer at -80C	FALSE	other	metagenome	female	256318	Salmonid gut microbiome	Image analysis was performed in real time by the MiSeq Control Software (MCS) v2.6.2.1 and Real Time Analysis (RTA) v1.18.54, running on the instrument computer. RTA performs real-time base calling on the MiSeq instrument computer. Then the Illumina bcl2fastq 2.20.0.422 pipeline was used to generate the sequence data. The data generated here meet the AGRF quality standards	2 NT	Illumina	Australian Genome Research Facility	not provided	Sequencing by synthesis	16S rRNA
92	D96	scissors and forceps	cut	2019-04-03	26(28)	TRUE	0	meters	Host-associated	Animal	Animal distal gut	marine biome	animal-associated habitat	intestine environment	host-associated	Australia:Tasmania	23	months	UBERON:gastrointestinal system	UBERON:lumen of gut	UBERON:colon	Atlantic salmon	519	cm	Salmo salar	0096	8030	1.78	kg	healthy	-41.1848	Decimal degrees	adult	146.371	Decimal degrees	stored in RNAlater and freezer at -80C	FALSE	other	metagenome	female	256318	Salmonid gut microbiome	Image analysis was performed in real time by the MiSeq Control Software (MCS) v2.6.2.1 and Real Time Analysis (RTA) v1.18.54, running on the instrument computer. RTA performs real-time base calling on the MiSeq instrument computer. Then the Illumina bcl2fastq 2.20.0.422 pipeline was used to generate the sequence data. The data generated here meet the AGRF quality standards	2 NT	Illumina	Australian Genome Research Facility	not provided	Sequencing by synthesis	16S rRNA
93	D97	scissors and forceps	cut	2019-04-03	26(28)	TRUE	0	meters	Host-associated	Animal	Animal distal gut	marine biome	animal-associated habitat	intestine environment	host-associated	Australia:Tasmania	23	months	UBERON:gastrointestinal system	UBERON:lumen of gut	UBERON:colon	Atlantic salmon	540	cm	Salmo salar	0097	8030	1.94	kg	healthy	-41.1848	Decimal degrees	adult	146.371	Decimal degrees	stored in RNAlater and freezer at -80C	FALSE	other	metagenome	female	256318	Salmonid gut microbiome	Image analysis was performed in real time by the MiSeq Control Software (MCS) v2.6.2.1 and Real Time Analysis (RTA) v1.18.54, running on the instrument computer. RTA performs real-time base calling on the MiSeq instrument computer. Then the Illumina bcl2fastq 2.20.0.422 pipeline was used to generate the sequence data. The data generated here meet the AGRF quality standards	2 NT	Illumina	Australian Genome Research Facility	not provided	Sequencing by synthesis	16S rRNA
94	D98	scissors and forceps	cut	2019-04-03	26(28)	TRUE	0	meters	Host-associated	Animal	Animal distal gut	marine biome	animal-associated habitat	intestine environment	host-associated	Australia:Tasmania	23	months	UBERON:gastrointestinal system	UBERON:lumen of gut	UBERON:colon	Atlantic salmon	510	cm	Salmo salar	0098	8030	1.66	kg	healthy	-41.1848	Decimal degrees	adult	146.371	Decimal degrees	stored in RNAlater and freezer at -80C	FALSE	other	metagenome	female	256318	Salmonid gut microbiome	Image analysis was performed in real time by the MiSeq Control Software (MCS) v2.6.2.1 and Real Time Analysis (RTA) v1.18.54, running on the instrument computer. RTA performs real-time base calling on the MiSeq instrument computer. Then the Illumina bcl2fastq 2.20.0.422 pipeline was used to generate the sequence data. The data generated here meet the AGRF quality standards	2 NT	Illumina	Australian Genome Research Facility	not provided	Sequencing by synthesis	16S rRNA
95	D99	scissors and forceps	cut	2019-04-03	26(28)	TRUE	0	meters	Host-associated	Animal	Animal distal gut	marine biome	animal-associated habitat	intestine environment	host-associated	Australia:Tasmania	23	months	UBERON:gastrointestinal system	UBERON:lumen of gut	UBERON:colon	Atlantic salmon	587	cm	Salmo salar	0099	8030	2.43	kg	healthy	-41.1848	Decimal degrees	adult	146.371	Decimal degrees	stored in RNAlater and freezer at -80C	FALSE	other	metagenome	female	256318	Salmonid gut microbiome	Image analysis was performed in real time by the MiSeq Control Software (MCS) v2.6.2.1 and Real Time Analysis (RTA) v1.18.54, running on the instrument computer. RTA performs real-time base calling on the MiSeq instrument computer. Then the Illumina bcl2fastq 2.20.0.422 pipeline was used to generate the sequence data. The data generated here meet the AGRF quality standards	2 NT	Illumina	Australian Genome Research Facility	not provided	Sequencing by synthesis	16S rRNA
96	D100	scissors and forceps	cut	2019-04-03	26(28)	TRUE	0	meters	Host-associated	Animal	Animal distal gut	marine biome	animal-associated habitat	intestine environment	host-associated	Australia:Tasmania	23	months	UBERON:gastrointestinal system	UBERON:lumen of gut	UBERON:colon	Atlantic salmon	565	cm	Salmo salar	0100	8030	2.11	kg	healthy	-41.1848	Decimal degrees	adult	146.371	Decimal degrees	stored in RNAlater and freezer at -80C	FALSE	other	metagenome	female	256318	Salmonid gut microbiome	Image analysis was performed in real time by the MiSeq Control Software (MCS) v2.6.2.1 and Real Time Analysis (RTA) v1.18.54, running on the instrument computer. RTA performs real-time base calling on the MiSeq instrument computer. Then the Illumina bcl2fastq 2.20.0.422 pipeline was used to generate the sequence data. The data generated here meet the AGRF quality standards	2 NT	Illumina	Australian Genome Research Facility	not provided	Sequencing by synthesis	16S rRNA
97	P1	scissors and forceps	cut	2019-04-02	25(27)	TRUE	0	meters	Host-associated	Animal	Animal pyloric caeca	marine biome	animal-associated habitat	intestine environment	host-associated	Australia:Tasmania	23	months	UBERON:gastrointestinal system	UBERON:lumen of gut	UBERON:colon	Atlantic salmon	548	cm	Salmo salar	0001	8030	1.98	kg	healthy	-41.1848	Decimal degrees	adult	146.371	Decimal degrees	stored in RNAlater and freezer at -80C	FALSE	other	metagenome	female	256318	Salmonid gut microbiome	Image analysis was performed in real time by the MiSeq Control Software (MCS) v2.6.2.1 and Real Time Analysis (RTA) v1.18.54, running on the instrument computer. RTA performs real-time base calling on the MiSeq instrument computer. Then the Illumina bcl2fastq 2.20.0.422 pipeline was used to generate the sequence data. The data generated here meet the AGRF quality standards	2 NT	Illumina	Australian Genome Research Facility	not provided	Sequencing by synthesis	16S rRNA
98	P2	scissors and forceps	cut	2019-04-02	25(27)	TRUE	0	meters	Host-associated	Animal	Animal pyloric caeca	marine biome	animal-associated habitat	intestine environment	host-associated	Australia:Tasmania	23	months	UBERON:gastrointestinal system	UBERON:lumen of gut	UBERON:colon	Atlantic salmon	537	cm	Salmo salar	0002	8030	2.14	kg	healthy	-41.1848	Decimal degrees	adult	146.371	Decimal degrees	stored in RNAlater and freezer at -80C	FALSE	other	metagenome	female	256318	Salmonid gut microbiome	Image analysis was performed in real time by the MiSeq Control Software (MCS) v2.6.2.1 and Real Time Analysis (RTA) v1.18.54, running on the instrument computer. RTA performs real-time base calling on the MiSeq instrument computer. Then the Illumina bcl2fastq 2.20.0.422 pipeline was used to generate the sequence data. The data generated here meet the AGRF quality standards	2 NT	Illumina	Australian Genome Research Facility	not provided	Sequencing by synthesis	16S rRNA
99	P3	scissors and forceps	cut	2019-04-02	25(27)	TRUE	0	meters	Host-associated	Animal	Animal pyloric caeca	marine biome	animal-associated habitat	intestine environment	host-associated	Australia:Tasmania	23	months	UBERON:gastrointestinal system	UBERON:lumen of gut	UBERON:colon	Atlantic salmon	454	cm	Salmo salar	0003	8030	1.32	kg	healthy	-41.1848	Decimal degrees	adult	146.371	Decimal degrees	stored in RNAlater and freezer at -80C	FALSE	other	metagenome	female	256318	Salmonid gut microbiome	Image analysis was performed in real time by the MiSeq Control Software (MCS) v2.6.2.1 and Real Time Analysis (RTA) v1.18.54, running on the instrument computer. RTA performs real-time base calling on the MiSeq instrument computer. Then the Illumina bcl2fastq 2.20.0.422 pipeline was used to generate the sequence data. The data generated here meet the AGRF quality standards	2 NT	Illumina	Australian Genome Research Facility	not provided	Sequencing by synthesis	16S rRNA
100	P4	scissors and forceps	cut	2019-04-02	25(27)	TRUE	0	meters	Host-associated	Animal	Animal pyloric caeca	marine biome	animal-associated habitat	intestine environment	host-associated	Australia:Tasmania	23	months	UBERON:gastrointestinal system	UBERON:lumen of gut	UBERON:colon	Atlantic salmon	575	cm	Salmo salar	0004	8030	2.25	kg	healthy	-41.1848	Decimal degrees	adult	146.371	Decimal degrees	stored in RNAlater and freezer at -80C	FALSE	other	metagenome	female	256318	Salmonid gut microbiome	Image analysis was performed in real time by the MiSeq Control Software (MCS) v2.6.2.1 and Real Time Analysis (RTA) v1.18.54, running on the instrument computer. RTA performs real-time base calling on the MiSeq instrument computer. Then the Illumina bcl2fastq 2.20.0.422 pipeline was used to generate the sequence data. The data generated here meet the AGRF quality standards	2 NT	Illumina	Australian Genome Research Facility	not provided	Sequencing by synthesis	16S rRNA
101	P5	scissors and forceps	cut	2019-04-02	25(27)	TRUE	0	meters	Host-associated	Animal	Animal pyloric caeca	marine biome	animal-associated habitat	intestine environment	host-associated	Australia:Tasmania	23	months	UBERON:gastrointestinal system	UBERON:lumen of gut	UBERON:colon	Atlantic salmon	525	cm	Salmo salar	0005	8030	1.74	kg	healthy	-41.1848	Decimal degrees	adult	146.371	Decimal degrees	stored in RNAlater and freezer at -80C	FALSE	other	metagenome	female	256318	Salmonid gut microbiome	Image analysis was performed in real time by the MiSeq Control Software (MCS) v2.6.2.1 and Real Time Analysis (RTA) v1.18.54, running on the instrument computer. RTA performs real-time base calling on the MiSeq instrument computer. Then the Illumina bcl2fastq 2.20.0.422 pipeline was used to generate the sequence data. The data generated here meet the AGRF quality standards	2 NT	Illumina	Australian Genome Research Facility	not provided	Sequencing by synthesis	16S rRNA
102	P6	scissors and forceps	cut	2019-04-02	25(27)	TRUE	0	meters	Host-associated	Animal	Animal pyloric caeca	marine biome	animal-associated habitat	intestine environment	host-associated	Australia:Tasmania	23	months	UBERON:gastrointestinal system	UBERON:lumen of gut	UBERON:colon	Atlantic salmon	557	cm	Salmo salar	0006	8030	2.35	kg	healthy	-41.1848	Decimal degrees	adult	146.371	Decimal degrees	stored in RNAlater and freezer at -80C	FALSE	other	metagenome	female	256318	Salmonid gut microbiome	Image analysis was performed in real time by the MiSeq Control Software (MCS) v2.6.2.1 and Real Time Analysis (RTA) v1.18.54, running on the instrument computer. RTA performs real-time base calling on the MiSeq instrument computer. Then the Illumina bcl2fastq 2.20.0.422 pipeline was used to generate the sequence data. The data generated here meet the AGRF quality standards	2 NT	Illumina	Australian Genome Research Facility	not provided	Sequencing by synthesis	16S rRNA
103	P7	scissors and forceps	cut	2019-04-02	25(27)	TRUE	0	meters	Host-associated	Animal	Animal pyloric caeca	marine biome	animal-associated habitat	intestine environment	host-associated	Australia:Tasmania	23	months	UBERON:gastrointestinal system	UBERON:lumen of gut	UBERON:colon	Atlantic salmon	557	cm	Salmo salar	0007	8030	2.2	kg	healthy	-41.1848	Decimal degrees	adult	146.371	Decimal degrees	stored in RNAlater and freezer at -80C	FALSE	other	metagenome	female	256318	Salmonid gut microbiome	Image analysis was performed in real time by the MiSeq Control Software (MCS) v2.6.2.1 and Real Time Analysis (RTA) v1.18.54, running on the instrument computer. RTA performs real-time base calling on the MiSeq instrument computer. Then the Illumina bcl2fastq 2.20.0.422 pipeline was used to generate the sequence data. The data generated here meet the AGRF quality standards	2 NT	Illumina	Australian Genome Research Facility	not provided	Sequencing by synthesis	16S rRNA
104	P8	scissors and forceps	cut	2019-04-02	25(27)	TRUE	0	meters	Host-associated	Animal	Animal pyloric caeca	marine biome	animal-associated habitat	intestine environment	host-associated	Australia:Tasmania	23	months	UBERON:gastrointestinal system	UBERON:lumen of gut	UBERON:colon	Atlantic salmon	554	cm	Salmo salar	0008	8030	2.36	kg	healthy	-41.1848	Decimal degrees	adult	146.371	Decimal degrees	stored in RNAlater and freezer at -80C	FALSE	other	metagenome	female	256318	Salmonid gut microbiome	Image analysis was performed in real time by the MiSeq Control Software (MCS) v2.6.2.1 and Real Time Analysis (RTA) v1.18.54, running on the instrument computer. RTA performs real-time base calling on the MiSeq instrument computer. Then the Illumina bcl2fastq 2.20.0.422 pipeline was used to generate the sequence data. The data generated here meet the AGRF quality standards	2 NT	Illumina	Australian Genome Research Facility	not provided	Sequencing by synthesis	16S rRNA
105	P9	scissors and forceps	cut	2019-04-02	25(27)	TRUE	0	meters	Host-associated	Animal	Animal pyloric caeca	marine biome	animal-associated habitat	intestine environment	host-associated	Australia:Tasmania	23	months	UBERON:gastrointestinal system	UBERON:lumen of gut	UBERON:colon	Atlantic salmon	555	cm	Salmo salar	0009	8030	2.35	kg	healthy	-41.1848	Decimal degrees	adult	146.371	Decimal degrees	stored in RNAlater and freezer at -80C	FALSE	other	metagenome	female	256318	Salmonid gut microbiome	Image analysis was performed in real time by the MiSeq Control Software (MCS) v2.6.2.1 and Real Time Analysis (RTA) v1.18.54, running on the instrument computer. RTA performs real-time base calling on the MiSeq instrument computer. Then the Illumina bcl2fastq 2.20.0.422 pipeline was used to generate the sequence data. The data generated here meet the AGRF quality standards	2 NT	Illumina	Australian Genome Research Facility	not provided	Sequencing by synthesis	16S rRNA
106	P10	scissors and forceps	cut	2019-04-02	25(27)	TRUE	0	meters	Host-associated	Animal	Animal pyloric caeca	marine biome	animal-associated habitat	intestine environment	host-associated	Australia:Tasmania	23	months	UBERON:gastrointestinal system	UBERON:lumen of gut	UBERON:colon	Atlantic salmon	575	cm	Salmo salar	0010	8030	2.36	kg	healthy	-41.1848	Decimal degrees	adult	146.371	Decimal degrees	stored in RNAlater and freezer at -80C	FALSE	other	metagenome	female	256318	Salmonid gut microbiome	Image analysis was performed in real time by the MiSeq Control Software (MCS) v2.6.2.1 and Real Time Analysis (RTA) v1.18.54, running on the instrument computer. RTA performs real-time base calling on the MiSeq instrument computer. Then the Illumina bcl2fastq 2.20.0.422 pipeline was used to generate the sequence data. The data generated here meet the AGRF quality standards	2 NT	Illumina	Australian Genome Research Facility	not provided	Sequencing by synthesis	16S rRNA
107	P11	scissors and forceps	cut	2019-04-02	25(27)	TRUE	0	meters	Host-associated	Animal	Animal pyloric caeca	marine biome	animal-associated habitat	intestine environment	host-associated	Australia:Tasmania	23	months	UBERON:gastrointestinal system	UBERON:lumen of gut	UBERON:colon	Atlantic salmon	590	cm	Salmo salar	0011	8030	2.39	kg	healthy	-41.1848	Decimal degrees	adult	146.371	Decimal degrees	stored in RNAlater and freezer at -80C	FALSE	other	metagenome	female	256318	Salmonid gut microbiome	Image analysis was performed in real time by the MiSeq Control Software (MCS) v2.6.2.1 and Real Time Analysis (RTA) v1.18.54, running on the instrument computer. RTA performs real-time base calling on the MiSeq instrument computer. Then the Illumina bcl2fastq 2.20.0.422 pipeline was used to generate the sequence data. The data generated here meet the AGRF quality standards	2 NT	Illumina	Australian Genome Research Facility	not provided	Sequencing by synthesis	16S rRNA
108	P12	scissors and forceps	cut	2019-04-02	25(27)	TRUE	0	meters	Host-associated	Animal	Animal pyloric caeca	marine biome	animal-associated habitat	intestine environment	host-associated	Australia:Tasmania	23	months	UBERON:gastrointestinal system	UBERON:lumen of gut	UBERON:colon	Atlantic salmon	576	cm	Salmo salar	0012	8030	2.57	kg	healthy	-41.1848	Decimal degrees	adult	146.371	Decimal degrees	stored in RNAlater and freezer at -80C	FALSE	other	metagenome	female	256318	Salmonid gut microbiome	Image analysis was performed in real time by the MiSeq Control Software (MCS) v2.6.2.1 and Real Time Analysis (RTA) v1.18.54, running on the instrument computer. RTA performs real-time base calling on the MiSeq instrument computer. Then the Illumina bcl2fastq 2.20.0.422 pipeline was used to generate the sequence data. The data generated here meet the AGRF quality standards	2 NT	Illumina	Australian Genome Research Facility	not provided	Sequencing by synthesis	16S rRNA
109	P13	scissors and forceps	cut	2019-04-02	25(27)	TRUE	0	meters	Host-associated	Animal	Animal pyloric caeca	marine biome	animal-associated habitat	intestine environment	host-associated	Australia:Tasmania	23	months	UBERON:gastrointestinal system	UBERON:lumen of gut	UBERON:colon	Atlantic salmon	540	cm	Salmo salar	0013	8030	2.04	kg	healthy	-41.1848	Decimal degrees	adult	146.371	Decimal degrees	stored in RNAlater and freezer at -80C	FALSE	other	metagenome	female	256318	Salmonid gut microbiome	Image analysis was performed in real time by the MiSeq Control Software (MCS) v2.6.2.1 and Real Time Analysis (RTA) v1.18.54, running on the instrument computer. RTA performs real-time base calling on the MiSeq instrument computer. Then the Illumina bcl2fastq 2.20.0.422 pipeline was used to generate the sequence data. The data generated here meet the AGRF quality standards	2 NT	Illumina	Australian Genome Research Facility	not provided	Sequencing by synthesis	16S rRNA
110	P14	scissors and forceps	cut	2019-04-02	25(27)	TRUE	0	meters	Host-associated	Animal	Animal pyloric caeca	marine biome	animal-associated habitat	intestine environment	host-associated	Australia:Tasmania	23	months	UBERON:gastrointestinal system	UBERON:lumen of gut	UBERON:colon	Atlantic salmon	590	cm	Salmo salar	0014	8030	3.06	kg	healthy	-41.1848	Decimal degrees	adult	146.371	Decimal degrees	stored in RNAlater and freezer at -80C	FALSE	other	metagenome	female	256318	Salmonid gut microbiome	Image analysis was performed in real time by the MiSeq Control Software (MCS) v2.6.2.1 and Real Time Analysis (RTA) v1.18.54, running on the instrument computer. RTA performs real-time base calling on the MiSeq instrument computer. Then the Illumina bcl2fastq 2.20.0.422 pipeline was used to generate the sequence data. The data generated here meet the AGRF quality standards	2 NT	Illumina	Australian Genome Research Facility	not provided	Sequencing by synthesis	16S rRNA
111	P16	scissors and forceps	cut	2019-04-02	25(27)	TRUE	0	meters	Host-associated	Animal	Animal pyloric caeca	marine biome	animal-associated habitat	intestine environment	host-associated	Australia:Tasmania	23	months	UBERON:gastrointestinal system	UBERON:lumen of gut	UBERON:colon	Atlantic salmon	640	cm	Salmo salar	0016	8030	3.54	kg	healthy	-41.1848	Decimal degrees	adult	146.371	Decimal degrees	stored in RNAlater and freezer at -80C	FALSE	other	metagenome	female	256318	Salmonid gut microbiome	Image analysis was performed in real time by the MiSeq Control Software (MCS) v2.6.2.1 and Real Time Analysis (RTA) v1.18.54, running on the instrument computer. RTA performs real-time base calling on the MiSeq instrument computer. Then the Illumina bcl2fastq 2.20.0.422 pipeline was used to generate the sequence data. The data generated here meet the AGRF quality standards	2 NT	Illumina	Australian Genome Research Facility	not provided	Sequencing by synthesis	16S rRNA
112	P17	scissors and forceps	cut	2019-04-02	25(27)	TRUE	0	meters	Host-associated	Animal	Animal pyloric caeca	marine biome	animal-associated habitat	intestine environment	host-associated	Australia:Tasmania	23	months	UBERON:gastrointestinal system	UBERON:lumen of gut	UBERON:colon	Atlantic salmon	601	cm	Salmo salar	0017	8030	3.01	kg	healthy	-41.1848	Decimal degrees	adult	146.371	Decimal degrees	stored in RNAlater and freezer at -80C	FALSE	other	metagenome	female	256318	Salmonid gut microbiome	Image analysis was performed in real time by the MiSeq Control Software (MCS) v2.6.2.1 and Real Time Analysis (RTA) v1.18.54, running on the instrument computer. RTA performs real-time base calling on the MiSeq instrument computer. Then the Illumina bcl2fastq 2.20.0.422 pipeline was used to generate the sequence data. The data generated here meet the AGRF quality standards	2 NT	Illumina	Australian Genome Research Facility	not provided	Sequencing by synthesis	16S rRNA
113	P18	scissors and forceps	cut	2019-04-02	25(27)	TRUE	0	meters	Host-associated	Animal	Animal pyloric caeca	marine biome	animal-associated habitat	intestine environment	host-associated	Australia:Tasmania	23	months	UBERON:gastrointestinal system	UBERON:lumen of gut	UBERON:colon	Atlantic salmon	518	cm	Salmo salar	0018	8030	1.56	kg	healthy	-41.1848	Decimal degrees	adult	146.371	Decimal degrees	stored in RNAlater and freezer at -80C	FALSE	other	metagenome	female	256318	Salmonid gut microbiome	Image analysis was performed in real time by the MiSeq Control Software (MCS) v2.6.2.1 and Real Time Analysis (RTA) v1.18.54, running on the instrument computer. RTA performs real-time base calling on the MiSeq instrument computer. Then the Illumina bcl2fastq 2.20.0.422 pipeline was used to generate the sequence data. The data generated here meet the AGRF quality standards	2 NT	Illumina	Australian Genome Research Facility	not provided	Sequencing by synthesis	16S rRNA
114	P19	scissors and forceps	cut	2019-04-02	25(27)	TRUE	0	meters	Host-associated	Animal	Animal pyloric caeca	marine biome	animal-associated habitat	intestine environment	host-associated	Australia:Tasmania	23	months	UBERON:gastrointestinal system	UBERON:lumen of gut	UBERON:colon	Atlantic salmon	530	cm	Salmo salar	0019	8030	1.75	kg	healthy	-41.1848	Decimal degrees	adult	146.371	Decimal degrees	stored in RNAlater and freezer at -80C	FALSE	other	metagenome	female	256318	Salmonid gut microbiome	Image analysis was performed in real time by the MiSeq Control Software (MCS) v2.6.2.1 and Real Time Analysis (RTA) v1.18.54, running on the instrument computer. RTA performs real-time base calling on the MiSeq instrument computer. Then the Illumina bcl2fastq 2.20.0.422 pipeline was used to generate the sequence data. The data generated here meet the AGRF quality standards	2 NT	Illumina	Australian Genome Research Facility	not provided	Sequencing by synthesis	16S rRNA
115	P20	scissors and forceps	cut	2019-04-02	25(27)	TRUE	0	meters	Host-associated	Animal	Animal pyloric caeca	marine biome	animal-associated habitat	intestine environment	host-associated	Australia:Tasmania	23	months	UBERON:gastrointestinal system	UBERON:lumen of gut	UBERON:colon	Atlantic salmon	545	cm	Salmo salar	0020	8030	2.18	kg	healthy	-41.1848	Decimal degrees	adult	146.371	Decimal degrees	stored in RNAlater and freezer at -80C	FALSE	other	metagenome	female	256318	Salmonid gut microbiome	Image analysis was performed in real time by the MiSeq Control Software (MCS) v2.6.2.1 and Real Time Analysis (RTA) v1.18.54, running on the instrument computer. RTA performs real-time base calling on the MiSeq instrument computer. Then the Illumina bcl2fastq 2.20.0.422 pipeline was used to generate the sequence data. The data generated here meet the AGRF quality standards	2 NT	Illumina	Australian Genome Research Facility	not provided	Sequencing by synthesis	16S rRNA
116	P21	scissors and forceps	cut	2019-04-02	25(27)	TRUE	0	meters	Host-associated	Animal	Animal pyloric caeca	marine biome	animal-associated habitat	intestine environment	host-associated	Australia:Tasmania	23	months	UBERON:gastrointestinal system	UBERON:lumen of gut	UBERON:colon	Atlantic salmon	580	cm	Salmo salar	0021	8030	2.41	kg	healthy	-41.1848	Decimal degrees	adult	146.371	Decimal degrees	stored in RNAlater and freezer at -80C	FALSE	other	metagenome	female	256318	Salmonid gut microbiome	Image analysis was performed in real time by the MiSeq Control Software (MCS) v2.6.2.1 and Real Time Analysis (RTA) v1.18.54, running on the instrument computer. RTA performs real-time base calling on the MiSeq instrument computer. Then the Illumina bcl2fastq 2.20.0.422 pipeline was used to generate the sequence data. The data generated here meet the AGRF quality standards	2 NT	Illumina	Australian Genome Research Facility	not provided	Sequencing by synthesis	16S rRNA
117	P22	scissors and forceps	cut	2019-04-02	25(27)	TRUE	0	meters	Host-associated	Animal	Animal pyloric caeca	marine biome	animal-associated habitat	intestine environment	host-associated	Australia:Tasmania	23	months	UBERON:gastrointestinal system	UBERON:lumen of gut	UBERON:colon	Atlantic salmon	607	cm	Salmo salar	0022	8030	3.18	kg	healthy	-41.1848	Decimal degrees	adult	146.371	Decimal degrees	stored in RNAlater and freezer at -80C	FALSE	other	metagenome	female	256318	Salmonid gut microbiome	Image analysis was performed in real time by the MiSeq Control Software (MCS) v2.6.2.1 and Real Time Analysis (RTA) v1.18.54, running on the instrument computer. RTA performs real-time base calling on the MiSeq instrument computer. Then the Illumina bcl2fastq 2.20.0.422 pipeline was used to generate the sequence data. The data generated here meet the AGRF quality standards	2 NT	Illumina	Australian Genome Research Facility	not provided	Sequencing by synthesis	16S rRNA
118	P23	scissors and forceps	cut	2019-04-02	25(27)	TRUE	0	meters	Host-associated	Animal	Animal pyloric caeca	marine biome	animal-associated habitat	intestine environment	host-associated	Australia:Tasmania	23	months	UBERON:gastrointestinal system	UBERON:lumen of gut	UBERON:colon	Atlantic salmon	530	cm	Salmo salar	0023	8030	1.93	kg	healthy	-41.1848	Decimal degrees	adult	146.371	Decimal degrees	stored in RNAlater and freezer at -80C	FALSE	other	metagenome	female	256318	Salmonid gut microbiome	Image analysis was performed in real time by the MiSeq Control Software (MCS) v2.6.2.1 and Real Time Analysis (RTA) v1.18.54, running on the instrument computer. RTA performs real-time base calling on the MiSeq instrument computer. Then the Illumina bcl2fastq 2.20.0.422 pipeline was used to generate the sequence data. The data generated here meet the AGRF quality standards	2 NT	Illumina	Australian Genome Research Facility	not provided	Sequencing by synthesis	16S rRNA
119	P24	scissors and forceps	cut	2019-04-02	25(27)	TRUE	0	meters	Host-associated	Animal	Animal pyloric caeca	marine biome	animal-associated habitat	intestine environment	host-associated	Australia:Tasmania	23	months	UBERON:gastrointestinal system	UBERON:lumen of gut	UBERON:colon	Atlantic salmon	582	cm	Salmo salar	0024	8030	2.3	kg	healthy	-41.1848	Decimal degrees	adult	146.371	Decimal degrees	stored in RNAlater and freezer at -80C	FALSE	other	metagenome	female	256318	Salmonid gut microbiome	Image analysis was performed in real time by the MiSeq Control Software (MCS) v2.6.2.1 and Real Time Analysis (RTA) v1.18.54, running on the instrument computer. RTA performs real-time base calling on the MiSeq instrument computer. Then the Illumina bcl2fastq 2.20.0.422 pipeline was used to generate the sequence data. The data generated here meet the AGRF quality standards	2 NT	Illumina	Australian Genome Research Facility	not provided	Sequencing by synthesis	16S rRNA
120	P25	scissors and forceps	cut	2019-04-02	25(27)	TRUE	0	meters	Host-associated	Animal	Animal pyloric caeca	marine biome	animal-associated habitat	intestine environment	host-associated	Australia:Tasmania	23	months	UBERON:gastrointestinal system	UBERON:lumen of gut	UBERON:colon	Atlantic salmon	531	cm	Salmo salar	0025	8030	1.48	kg	healthy	-41.1848	Decimal degrees	adult	146.371	Decimal degrees	stored in RNAlater and freezer at -80C	FALSE	other	metagenome	female	256318	Salmonid gut microbiome	Image analysis was performed in real time by the MiSeq Control Software (MCS) v2.6.2.1 and Real Time Analysis (RTA) v1.18.54, running on the instrument computer. RTA performs real-time base calling on the MiSeq instrument computer. Then the Illumina bcl2fastq 2.20.0.422 pipeline was used to generate the sequence data. The data generated here meet the AGRF quality standards	2 NT	Illumina	Australian Genome Research Facility	not provided	Sequencing by synthesis	16S rRNA
121	P26	scissors and forceps	cut	2019-04-02	25(27)	TRUE	0	meters	Host-associated	Animal	Animal pyloric caeca	marine biome	animal-associated habitat	intestine environment	host-associated	Australia:Tasmania	23	months	UBERON:gastrointestinal system	UBERON:lumen of gut	UBERON:colon	Atlantic salmon	547	cm	Salmo salar	0026	8030	1.98	kg	healthy	-41.1848	Decimal degrees	adult	146.371	Decimal degrees	stored in RNAlater and freezer at -80C	FALSE	other	metagenome	female	256318	Salmonid gut microbiome	Image analysis was performed in real time by the MiSeq Control Software (MCS) v2.6.2.1 and Real Time Analysis (RTA) v1.18.54, running on the instrument computer. RTA performs real-time base calling on the MiSeq instrument computer. Then the Illumina bcl2fastq 2.20.0.422 pipeline was used to generate the sequence data. The data generated here meet the AGRF quality standards	2 NT	Illumina	Australian Genome Research Facility	not provided	Sequencing by synthesis	16S rRNA
122	P27	scissors and forceps	cut	2019-04-02	25(27)	TRUE	0	meters	Host-associated	Animal	Animal pyloric caeca	marine biome	animal-associated habitat	intestine environment	host-associated	Australia:Tasmania	23	months	UBERON:gastrointestinal system	UBERON:lumen of gut	UBERON:colon	Atlantic salmon	575	cm	Salmo salar	0027	8030	2.71	kg	healthy	-41.1848	Decimal degrees	adult	146.371	Decimal degrees	stored in RNAlater and freezer at -80C	FALSE	other	metagenome	female	256318	Salmonid gut microbiome	Image analysis was performed in real time by the MiSeq Control Software (MCS) v2.6.2.1 and Real Time Analysis (RTA) v1.18.54, running on the instrument computer. RTA performs real-time base calling on the MiSeq instrument computer. Then the Illumina bcl2fastq 2.20.0.422 pipeline was used to generate the sequence data. The data generated here meet the AGRF quality standards	2 NT	Illumina	Australian Genome Research Facility	not provided	Sequencing by synthesis	16S rRNA
123	P28	scissors and forceps	cut	2019-04-02	25(27)	TRUE	0	meters	Host-associated	Animal	Animal pyloric caeca	marine biome	animal-associated habitat	intestine environment	host-associated	Australia:Tasmania	23	months	UBERON:gastrointestinal system	UBERON:lumen of gut	UBERON:colon	Atlantic salmon	546	cm	Salmo salar	0028	8030	2.19	kg	healthy	-41.1848	Decimal degrees	adult	146.371	Decimal degrees	stored in RNAlater and freezer at -80C	FALSE	other	metagenome	female	256318	Salmonid gut microbiome	Image analysis was performed in real time by the MiSeq Control Software (MCS) v2.6.2.1 and Real Time Analysis (RTA) v1.18.54, running on the instrument computer. RTA performs real-time base calling on the MiSeq instrument computer. Then the Illumina bcl2fastq 2.20.0.422 pipeline was used to generate the sequence data. The data generated here meet the AGRF quality standards	2 NT	Illumina	Australian Genome Research Facility	not provided	Sequencing by synthesis	16S rRNA
124	P29	scissors and forceps	cut	2019-04-02	25(27)	TRUE	0	meters	Host-associated	Animal	Animal pyloric caeca	marine biome	animal-associated habitat	intestine environment	host-associated	Australia:Tasmania	23	months	UBERON:gastrointestinal system	UBERON:lumen of gut	UBERON:colon	Atlantic salmon	534	cm	Salmo salar	0029	8030	2.08	kg	healthy	-41.1848	Decimal degrees	adult	146.371	Decimal degrees	stored in RNAlater and freezer at -80C	FALSE	other	metagenome	female	256318	Salmonid gut microbiome	Image analysis was performed in real time by the MiSeq Control Software (MCS) v2.6.2.1 and Real Time Analysis (RTA) v1.18.54, running on the instrument computer. RTA performs real-time base calling on the MiSeq instrument computer. Then the Illumina bcl2fastq 2.20.0.422 pipeline was used to generate the sequence data. The data generated here meet the AGRF quality standards	2 NT	Illumina	Australian Genome Research Facility	not provided	Sequencing by synthesis	16S rRNA
125	P30	scissors and forceps	cut	2019-04-02	25(27)	TRUE	0	meters	Host-associated	Animal	Animal pyloric caeca	marine biome	animal-associated habitat	intestine environment	host-associated	Australia:Tasmania	23	months	UBERON:gastrointestinal system	UBERON:lumen of gut	UBERON:colon	Atlantic salmon	486	cm	Salmo salar	0030	8030	1.44	kg	healthy	-41.1848	Decimal degrees	adult	146.371	Decimal degrees	stored in RNAlater and freezer at -80C	FALSE	other	metagenome	female	256318	Salmonid gut microbiome	Image analysis was performed in real time by the MiSeq Control Software (MCS) v2.6.2.1 and Real Time Analysis (RTA) v1.18.54, running on the instrument computer. RTA performs real-time base calling on the MiSeq instrument computer. Then the Illumina bcl2fastq 2.20.0.422 pipeline was used to generate the sequence data. The data generated here meet the AGRF quality standards	2 NT	Illumina	Australian Genome Research Facility	not provided	Sequencing by synthesis	16S rRNA
126	P31	scissors and forceps	cut	2019-04-02	25(27)	TRUE	0	meters	Host-associated	Animal	Animal pyloric caeca	marine biome	animal-associated habitat	intestine environment	host-associated	Australia:Tasmania	23	months	UBERON:gastrointestinal system	UBERON:lumen of gut	UBERON:colon	Atlantic salmon	569	cm	Salmo salar	0031	8030	2.35	kg	healthy	-41.1848	Decimal degrees	adult	146.371	Decimal degrees	stored in RNAlater and freezer at -80C	FALSE	other	metagenome	female	256318	Salmonid gut microbiome	Image analysis was performed in real time by the MiSeq Control Software (MCS) v2.6.2.1 and Real Time Analysis (RTA) v1.18.54, running on the instrument computer. RTA performs real-time base calling on the MiSeq instrument computer. Then the Illumina bcl2fastq 2.20.0.422 pipeline was used to generate the sequence data. The data generated here meet the AGRF quality standards	2 NT	Illumina	Australian Genome Research Facility	not provided	Sequencing by synthesis	16S rRNA
127	P32	scissors and forceps	cut	2019-04-02	25(27)	TRUE	0	meters	Host-associated	Animal	Animal pyloric caeca	marine biome	animal-associated habitat	intestine environment	host-associated	Australia:Tasmania	23	months	UBERON:gastrointestinal system	UBERON:lumen of gut	UBERON:colon	Atlantic salmon	565	cm	Salmo salar	0032	8030	2.48	kg	healthy	-41.1848	Decimal degrees	adult	146.371	Decimal degrees	stored in RNAlater and freezer at -80C	FALSE	other	metagenome	female	256318	Salmonid gut microbiome	Image analysis was performed in real time by the MiSeq Control Software (MCS) v2.6.2.1 and Real Time Analysis (RTA) v1.18.54, running on the instrument computer. RTA performs real-time base calling on the MiSeq instrument computer. Then the Illumina bcl2fastq 2.20.0.422 pipeline was used to generate the sequence data. The data generated here meet the AGRF quality standards	2 NT	Illumina	Australian Genome Research Facility	not provided	Sequencing by synthesis	16S rRNA
128	P33	scissors and forceps	cut	2019-04-02	25(27)	TRUE	0	meters	Host-associated	Animal	Animal pyloric caeca	marine biome	animal-associated habitat	intestine environment	host-associated	Australia:Tasmania	23	months	UBERON:gastrointestinal system	UBERON:lumen of gut	UBERON:colon	Atlantic salmon	573	cm	Salmo salar	0033	8030	2.72	kg	healthy	-41.1848	Decimal degrees	adult	146.371	Decimal degrees	stored in RNAlater and freezer at -80C	FALSE	other	metagenome	female	256318	Salmonid gut microbiome	Image analysis was performed in real time by the MiSeq Control Software (MCS) v2.6.2.1 and Real Time Analysis (RTA) v1.18.54, running on the instrument computer. RTA performs real-time base calling on the MiSeq instrument computer. Then the Illumina bcl2fastq 2.20.0.422 pipeline was used to generate the sequence data. The data generated here meet the AGRF quality standards	2 NT	Illumina	Australian Genome Research Facility	not provided	Sequencing by synthesis	16S rRNA
129	P34	scissors and forceps	cut	2019-04-02	25(27)	TRUE	0	meters	Host-associated	Animal	Animal pyloric caeca	marine biome	animal-associated habitat	intestine environment	host-associated	Australia:Tasmania	23	months	UBERON:gastrointestinal system	UBERON:lumen of gut	UBERON:colon	Atlantic salmon	561	cm	Salmo salar	0034	8030	2.48	kg	healthy	-41.1848	Decimal degrees	adult	146.371	Decimal degrees	stored in RNAlater and freezer at -80C	FALSE	other	metagenome	female	256318	Salmonid gut microbiome	Image analysis was performed in real time by the MiSeq Control Software (MCS) v2.6.2.1 and Real Time Analysis (RTA) v1.18.54, running on the instrument computer. RTA performs real-time base calling on the MiSeq instrument computer. Then the Illumina bcl2fastq 2.20.0.422 pipeline was used to generate the sequence data. The data generated here meet the AGRF quality standards	2 NT	Illumina	Australian Genome Research Facility	not provided	Sequencing by synthesis	16S rRNA
130	P36	scissors and forceps	cut	2019-04-02	25(27)	TRUE	0	meters	Host-associated	Animal	Animal pyloric caeca	marine biome	animal-associated habitat	intestine environment	host-associated	Australia:Tasmania	23	months	UBERON:gastrointestinal system	UBERON:lumen of gut	UBERON:colon	Atlantic salmon	574	cm	Salmo salar	0036	8030	1.93	kg	healthy	-41.1848	Decimal degrees	adult	146.371	Decimal degrees	stored in RNAlater and freezer at -80C	FALSE	other	metagenome	female	256318	Salmonid gut microbiome	Image analysis was performed in real time by the MiSeq Control Software (MCS) v2.6.2.1 and Real Time Analysis (RTA) v1.18.54, running on the instrument computer. RTA performs real-time base calling on the MiSeq instrument computer. Then the Illumina bcl2fastq 2.20.0.422 pipeline was used to generate the sequence data. The data generated here meet the AGRF quality standards	2 NT	Illumina	Australian Genome Research Facility	not provided	Sequencing by synthesis	16S rRNA
131	P37	scissors and forceps	cut	2019-04-02	25(27)	TRUE	0	meters	Host-associated	Animal	Animal pyloric caeca	marine biome	animal-associated habitat	intestine environment	host-associated	Australia:Tasmania	23	months	UBERON:gastrointestinal system	UBERON:lumen of gut	UBERON:colon	Atlantic salmon	570	cm	Salmo salar	0037	8030	2.24	kg	healthy	-41.1848	Decimal degrees	adult	146.371	Decimal degrees	stored in RNAlater and freezer at -80C	FALSE	other	metagenome	female	256318	Salmonid gut microbiome	Image analysis was performed in real time by the MiSeq Control Software (MCS) v2.6.2.1 and Real Time Analysis (RTA) v1.18.54, running on the instrument computer. RTA performs real-time base calling on the MiSeq instrument computer. Then the Illumina bcl2fastq 2.20.0.422 pipeline was used to generate the sequence data. The data generated here meet the AGRF quality standards	2 NT	Illumina	Australian Genome Research Facility	not provided	Sequencing by synthesis	16S rRNA
132	P38	scissors and forceps	cut	2019-04-02	25(27)	TRUE	0	meters	Host-associated	Animal	Animal pyloric caeca	marine biome	animal-associated habitat	intestine environment	host-associated	Australia:Tasmania	23	months	UBERON:gastrointestinal system	UBERON:lumen of gut	UBERON:colon	Atlantic salmon	540	cm	Salmo salar	0038	8030	1.88	kg	healthy	-41.1848	Decimal degrees	adult	146.371	Decimal degrees	stored in RNAlater and freezer at -80C	FALSE	other	metagenome	female	256318	Salmonid gut microbiome	Image analysis was performed in real time by the MiSeq Control Software (MCS) v2.6.2.1 and Real Time Analysis (RTA) v1.18.54, running on the instrument computer. RTA performs real-time base calling on the MiSeq instrument computer. Then the Illumina bcl2fastq 2.20.0.422 pipeline was used to generate the sequence data. The data generated here meet the AGRF quality standards	2 NT	Illumina	Australian Genome Research Facility	not provided	Sequencing by synthesis	16S rRNA
133	P39	scissors and forceps	cut	2019-04-02	25(27)	TRUE	0	meters	Host-associated	Animal	Animal pyloric caeca	marine biome	animal-associated habitat	intestine environment	host-associated	Australia:Tasmania	23	months	UBERON:gastrointestinal system	UBERON:lumen of gut	UBERON:colon	Atlantic salmon	503	cm	Salmo salar	0039	8030	2.16	kg	healthy	-41.1848	Decimal degrees	adult	146.371	Decimal degrees	stored in RNAlater and freezer at -80C	FALSE	other	metagenome	female	256318	Salmonid gut microbiome	Image analysis was performed in real time by the MiSeq Control Software (MCS) v2.6.2.1 and Real Time Analysis (RTA) v1.18.54, running on the instrument computer. RTA performs real-time base calling on the MiSeq instrument computer. Then the Illumina bcl2fastq 2.20.0.422 pipeline was used to generate the sequence data. The data generated here meet the AGRF quality standards	2 NT	Illumina	Australian Genome Research Facility	not provided	Sequencing by synthesis	16S rRNA
134	P40	scissors and forceps	cut	2019-04-02	25(27)	TRUE	0	meters	Host-associated	Animal	Animal pyloric caeca	marine biome	animal-associated habitat	intestine environment	host-associated	Australia:Tasmania	23	months	UBERON:gastrointestinal system	UBERON:lumen of gut	UBERON:colon	Atlantic salmon	528	cm	Salmo salar	0040	8030	1.71	kg	healthy	-41.1848	Decimal degrees	adult	146.371	Decimal degrees	stored in RNAlater and freezer at -80C	FALSE	other	metagenome	female	256318	Salmonid gut microbiome	Image analysis was performed in real time by the MiSeq Control Software (MCS) v2.6.2.1 and Real Time Analysis (RTA) v1.18.54, running on the instrument computer. RTA performs real-time base calling on the MiSeq instrument computer. Then the Illumina bcl2fastq 2.20.0.422 pipeline was used to generate the sequence data. The data generated here meet the AGRF quality standards	2 NT	Illumina	Australian Genome Research Facility	not provided	Sequencing by synthesis	16S rRNA
135	P42	scissors and forceps	cut	2019-04-02	25(27)	TRUE	0	meters	Host-associated	Animal	Animal pyloric caeca	marine biome	animal-associated habitat	intestine environment	host-associated	Australia:Tasmania	23	months	UBERON:gastrointestinal system	UBERON:lumen of gut	UBERON:colon	Atlantic salmon	498	cm	Salmo salar	0042	8030	1.39	kg	healthy	-41.1848	Decimal degrees	adult	146.371	Decimal degrees	stored in RNAlater and freezer at -80C	FALSE	other	metagenome	female	256318	Salmonid gut microbiome	Image analysis was performed in real time by the MiSeq Control Software (MCS) v2.6.2.1 and Real Time Analysis (RTA) v1.18.54, running on the instrument computer. RTA performs real-time base calling on the MiSeq instrument computer. Then the Illumina bcl2fastq 2.20.0.422 pipeline was used to generate the sequence data. The data generated here meet the AGRF quality standards	2 NT	Illumina	Australian Genome Research Facility	not provided	Sequencing by synthesis	16S rRNA
136	P43	scissors and forceps	cut	2019-04-02	25(27)	TRUE	0	meters	Host-associated	Animal	Animal pyloric caeca	marine biome	animal-associated habitat	intestine environment	host-associated	Australia:Tasmania	23	months	UBERON:gastrointestinal system	UBERON:lumen of gut	UBERON:colon	Atlantic salmon	531	cm	Salmo salar	0043	8030	1.87	kg	healthy	-41.1848	Decimal degrees	adult	146.371	Decimal degrees	stored in RNAlater and freezer at -80C	FALSE	other	metagenome	female	256318	Salmonid gut microbiome	Image analysis was performed in real time by the MiSeq Control Software (MCS) v2.6.2.1 and Real Time Analysis (RTA) v1.18.54, running on the instrument computer. RTA performs real-time base calling on the MiSeq instrument computer. Then the Illumina bcl2fastq 2.20.0.422 pipeline was used to generate the sequence data. The data generated here meet the AGRF quality standards	2 NT	Illumina	Australian Genome Research Facility	not provided	Sequencing by synthesis	16S rRNA
137	P44	scissors and forceps	cut	2019-04-02	25(27)	TRUE	0	meters	Host-associated	Animal	Animal pyloric caeca	marine biome	animal-associated habitat	intestine environment	host-associated	Australia:Tasmania	23	months	UBERON:gastrointestinal system	UBERON:lumen of gut	UBERON:colon	Atlantic salmon	535	cm	Salmo salar	0044	8030	1.97	kg	healthy	-41.1848	Decimal degrees	adult	146.371	Decimal degrees	stored in RNAlater and freezer at -80C	FALSE	other	metagenome	female	256318	Salmonid gut microbiome	Image analysis was performed in real time by the MiSeq Control Software (MCS) v2.6.2.1 and Real Time Analysis (RTA) v1.18.54, running on the instrument computer. RTA performs real-time base calling on the MiSeq instrument computer. Then the Illumina bcl2fastq 2.20.0.422 pipeline was used to generate the sequence data. The data generated here meet the AGRF quality standards	2 NT	Illumina	Australian Genome Research Facility	not provided	Sequencing by synthesis	16S rRNA
138	P46	scissors and forceps	cut	2019-04-02	25(27)	TRUE	0	meters	Host-associated	Animal	Animal pyloric caeca	marine biome	animal-associated habitat	intestine environment	host-associated	Australia:Tasmania	23	months	UBERON:gastrointestinal system	UBERON:lumen of gut	UBERON:colon	Atlantic salmon	510	cm	Salmo salar	0046	8030	1.77	kg	healthy	-41.1848	Decimal degrees	adult	146.371	Decimal degrees	stored in RNAlater and freezer at -80C	FALSE	other	metagenome	female	256318	Salmonid gut microbiome	Image analysis was performed in real time by the MiSeq Control Software (MCS) v2.6.2.1 and Real Time Analysis (RTA) v1.18.54, running on the instrument computer. RTA performs real-time base calling on the MiSeq instrument computer. Then the Illumina bcl2fastq 2.20.0.422 pipeline was used to generate the sequence data. The data generated here meet the AGRF quality standards	2 NT	Illumina	Australian Genome Research Facility	not provided	Sequencing by synthesis	16S rRNA
139	P47	scissors and forceps	cut	2019-04-03	26(28)	TRUE	0	meters	Host-associated	Animal	Animal pyloric caeca	marine biome	animal-associated habitat	intestine environment	host-associated	Australia:Tasmania	23	months	UBERON:gastrointestinal system	UBERON:lumen of gut	UBERON:colon	Atlantic salmon	594	cm	Salmo salar	0047	8030	2.78	kg	healthy	-41.1848	Decimal degrees	adult	146.371	Decimal degrees	stored in RNAlater and freezer at -80C	FALSE	other	metagenome	female	256318	Salmonid gut microbiome	Image analysis was performed in real time by the MiSeq Control Software (MCS) v2.6.2.1 and Real Time Analysis (RTA) v1.18.54, running on the instrument computer. RTA performs real-time base calling on the MiSeq instrument computer. Then the Illumina bcl2fastq 2.20.0.422 pipeline was used to generate the sequence data. The data generated here meet the AGRF quality standards	2 NT	Illumina	Australian Genome Research Facility	not provided	Sequencing by synthesis	16S rRNA
140	P48	scissors and forceps	cut	2019-04-03	26(28)	TRUE	0	meters	Host-associated	Animal	Animal pyloric caeca	marine biome	animal-associated habitat	intestine environment	host-associated	Australia:Tasmania	23	months	UBERON:gastrointestinal system	UBERON:lumen of gut	UBERON:colon	Atlantic salmon	615	cm	Salmo salar	0048	8030	3.27	kg	healthy	-41.1848	Decimal degrees	adult	146.371	Decimal degrees	stored in RNAlater and freezer at -80C	FALSE	other	metagenome	female	256318	Salmonid gut microbiome	Image analysis was performed in real time by the MiSeq Control Software (MCS) v2.6.2.1 and Real Time Analysis (RTA) v1.18.54, running on the instrument computer. RTA performs real-time base calling on the MiSeq instrument computer. Then the Illumina bcl2fastq 2.20.0.422 pipeline was used to generate the sequence data. The data generated here meet the AGRF quality standards	2 NT	Illumina	Australian Genome Research Facility	not provided	Sequencing by synthesis	16S rRNA
141	P49	scissors and forceps	cut	2019-04-03	26(28)	TRUE	0	meters	Host-associated	Animal	Animal pyloric caeca	marine biome	animal-associated habitat	intestine environment	host-associated	Australia:Tasmania	23	months	UBERON:gastrointestinal system	UBERON:lumen of gut	UBERON:colon	Atlantic salmon	620	cm	Salmo salar	0049	8030	3.62	kg	healthy	-41.1848	Decimal degrees	adult	146.371	Decimal degrees	stored in RNAlater and freezer at -80C	FALSE	other	metagenome	female	256318	Salmonid gut microbiome	Image analysis was performed in real time by the MiSeq Control Software (MCS) v2.6.2.1 and Real Time Analysis (RTA) v1.18.54, running on the instrument computer. RTA performs real-time base calling on the MiSeq instrument computer. Then the Illumina bcl2fastq 2.20.0.422 pipeline was used to generate the sequence data. The data generated here meet the AGRF quality standards	2 NT	Illumina	Australian Genome Research Facility	not provided	Sequencing by synthesis	16S rRNA
142	P50	scissors and forceps	cut	2019-04-03	26(28)	TRUE	0	meters	Host-associated	Animal	Animal pyloric caeca	marine biome	animal-associated habitat	intestine environment	host-associated	Australia:Tasmania	23	months	UBERON:gastrointestinal system	UBERON:lumen of gut	UBERON:colon	Atlantic salmon	572	cm	Salmo salar	0050	8030	2.49	kg	healthy	-41.1848	Decimal degrees	adult	146.371	Decimal degrees	stored in RNAlater and freezer at -80C	FALSE	other	metagenome	female	256318	Salmonid gut microbiome	Image analysis was performed in real time by the MiSeq Control Software (MCS) v2.6.2.1 and Real Time Analysis (RTA) v1.18.54, running on the instrument computer. RTA performs real-time base calling on the MiSeq instrument computer. Then the Illumina bcl2fastq 2.20.0.422 pipeline was used to generate the sequence data. The data generated here meet the AGRF quality standards	2 NT	Illumina	Australian Genome Research Facility	not provided	Sequencing by synthesis	16S rRNA
143	P51	scissors and forceps	cut	2019-04-03	26(28)	TRUE	0	meters	Host-associated	Animal	Animal pyloric caeca	marine biome	animal-associated habitat	intestine environment	host-associated	Australia:Tasmania	23	months	UBERON:gastrointestinal system	UBERON:lumen of gut	UBERON:colon	Atlantic salmon	525	cm	Salmo salar	0051	8030	1.67	kg	healthy	-41.1848	Decimal degrees	adult	146.371	Decimal degrees	stored in RNAlater and freezer at -80C	FALSE	other	metagenome	female	256318	Salmonid gut microbiome	Image analysis was performed in real time by the MiSeq Control Software (MCS) v2.6.2.1 and Real Time Analysis (RTA) v1.18.54, running on the instrument computer. RTA performs real-time base calling on the MiSeq instrument computer. Then the Illumina bcl2fastq 2.20.0.422 pipeline was used to generate the sequence data. The data generated here meet the AGRF quality standards	2 NT	Illumina	Australian Genome Research Facility	not provided	Sequencing by synthesis	16S rRNA
144	P52	scissors and forceps	cut	2019-04-03	26(28)	TRUE	0	meters	Host-associated	Animal	Animal pyloric caeca	marine biome	animal-associated habitat	intestine environment	host-associated	Australia:Tasmania	23	months	UBERON:gastrointestinal system	UBERON:lumen of gut	UBERON:colon	Atlantic salmon	559	cm	Salmo salar	0052	8030	2.34	kg	healthy	-41.1848	Decimal degrees	adult	146.371	Decimal degrees	stored in RNAlater and freezer at -80C	FALSE	other	metagenome	female	256318	Salmonid gut microbiome	Image analysis was performed in real time by the MiSeq Control Software (MCS) v2.6.2.1 and Real Time Analysis (RTA) v1.18.54, running on the instrument computer. RTA performs real-time base calling on the MiSeq instrument computer. Then the Illumina bcl2fastq 2.20.0.422 pipeline was used to generate the sequence data. The data generated here meet the AGRF quality standards	2 NT	Illumina	Australian Genome Research Facility	not provided	Sequencing by synthesis	16S rRNA
145	P53	scissors and forceps	cut	2019-04-03	26(28)	TRUE	0	meters	Host-associated	Animal	Animal pyloric caeca	marine biome	animal-associated habitat	intestine environment	host-associated	Australia:Tasmania	23	months	UBERON:gastrointestinal system	UBERON:lumen of gut	UBERON:colon	Atlantic salmon	563	cm	Salmo salar	0053	8030	2.5	kg	healthy	-41.1848	Decimal degrees	adult	146.371	Decimal degrees	stored in RNAlater and freezer at -80C	FALSE	other	metagenome	female	256318	Salmonid gut microbiome	Image analysis was performed in real time by the MiSeq Control Software (MCS) v2.6.2.1 and Real Time Analysis (RTA) v1.18.54, running on the instrument computer. RTA performs real-time base calling on the MiSeq instrument computer. Then the Illumina bcl2fastq 2.20.0.422 pipeline was used to generate the sequence data. The data generated here meet the AGRF quality standards	2 NT	Illumina	Australian Genome Research Facility	not provided	Sequencing by synthesis	16S rRNA
146	P54	scissors and forceps	cut	2019-04-03	26(28)	TRUE	0	meters	Host-associated	Animal	Animal pyloric caeca	marine biome	animal-associated habitat	intestine environment	host-associated	Australia:Tasmania	23	months	UBERON:gastrointestinal system	UBERON:lumen of gut	UBERON:colon	Atlantic salmon	600	cm	Salmo salar	0054	8030	3.02	kg	healthy	-41.1848	Decimal degrees	adult	146.371	Decimal degrees	stored in RNAlater and freezer at -80C	FALSE	other	metagenome	female	256318	Salmonid gut microbiome	Image analysis was performed in real time by the MiSeq Control Software (MCS) v2.6.2.1 and Real Time Analysis (RTA) v1.18.54, running on the instrument computer. RTA performs real-time base calling on the MiSeq instrument computer. Then the Illumina bcl2fastq 2.20.0.422 pipeline was used to generate the sequence data. The data generated here meet the AGRF quality standards	2 NT	Illumina	Australian Genome Research Facility	not provided	Sequencing by synthesis	16S rRNA
147	P55	scissors and forceps	cut	2019-04-03	26(28)	TRUE	0	meters	Host-associated	Animal	Animal pyloric caeca	marine biome	animal-associated habitat	intestine environment	host-associated	Australia:Tasmania	23	months	UBERON:gastrointestinal system	UBERON:lumen of gut	UBERON:colon	Atlantic salmon	607	cm	Salmo salar	0055	8030	2.98	kg	healthy	-41.1848	Decimal degrees	adult	146.371	Decimal degrees	stored in RNAlater and freezer at -80C	FALSE	other	metagenome	female	256318	Salmonid gut microbiome	Image analysis was performed in real time by the MiSeq Control Software (MCS) v2.6.2.1 and Real Time Analysis (RTA) v1.18.54, running on the instrument computer. RTA performs real-time base calling on the MiSeq instrument computer. Then the Illumina bcl2fastq 2.20.0.422 pipeline was used to generate the sequence data. The data generated here meet the AGRF quality standards	2 NT	Illumina	Australian Genome Research Facility	not provided	Sequencing by synthesis	16S rRNA
148	P56	scissors and forceps	cut	2019-04-03	26(28)	TRUE	0	meters	Host-associated	Animal	Animal pyloric caeca	marine biome	animal-associated habitat	intestine environment	host-associated	Australia:Tasmania	23	months	UBERON:gastrointestinal system	UBERON:lumen of gut	UBERON:colon	Atlantic salmon	533	cm	Salmo salar	0056	8030	2.06	kg	healthy	-41.1848	Decimal degrees	adult	146.371	Decimal degrees	stored in RNAlater and freezer at -80C	FALSE	other	metagenome	female	256318	Salmonid gut microbiome	Image analysis was performed in real time by the MiSeq Control Software (MCS) v2.6.2.1 and Real Time Analysis (RTA) v1.18.54, running on the instrument computer. RTA performs real-time base calling on the MiSeq instrument computer. Then the Illumina bcl2fastq 2.20.0.422 pipeline was used to generate the sequence data. The data generated here meet the AGRF quality standards	2 NT	Illumina	Australian Genome Research Facility	not provided	Sequencing by synthesis	16S rRNA
149	P57	scissors and forceps	cut	2019-04-03	26(28)	TRUE	0	meters	Host-associated	Animal	Animal pyloric caeca	marine biome	animal-associated habitat	intestine environment	host-associated	Australia:Tasmania	23	months	UBERON:gastrointestinal system	UBERON:lumen of gut	UBERON:colon	Atlantic salmon	614	cm	Salmo salar	0057	8030	3.43	kg	healthy	-41.1848	Decimal degrees	adult	146.371	Decimal degrees	stored in RNAlater and freezer at -80C	FALSE	other	metagenome	female	256318	Salmonid gut microbiome	Image analysis was performed in real time by the MiSeq Control Software (MCS) v2.6.2.1 and Real Time Analysis (RTA) v1.18.54, running on the instrument computer. RTA performs real-time base calling on the MiSeq instrument computer. Then the Illumina bcl2fastq 2.20.0.422 pipeline was used to generate the sequence data. The data generated here meet the AGRF quality standards	2 NT	Illumina	Australian Genome Research Facility	not provided	Sequencing by synthesis	16S rRNA
150	P58	scissors and forceps	cut	2019-04-03	26(28)	TRUE	0	meters	Host-associated	Animal	Animal pyloric caeca	marine biome	animal-associated habitat	intestine environment	host-associated	Australia:Tasmania	23	months	UBERON:gastrointestinal system	UBERON:lumen of gut	UBERON:colon	Atlantic salmon	547	cm	Salmo salar	0058	8030	2.31	kg	healthy	-41.1848	Decimal degrees	adult	146.371	Decimal degrees	stored in RNAlater and freezer at -80C	FALSE	other	metagenome	female	256318	Salmonid gut microbiome	Image analysis was performed in real time by the MiSeq Control Software (MCS) v2.6.2.1 and Real Time Analysis (RTA) v1.18.54, running on the instrument computer. RTA performs real-time base calling on the MiSeq instrument computer. Then the Illumina bcl2fastq 2.20.0.422 pipeline was used to generate the sequence data. The data generated here meet the AGRF quality standards	2 NT	Illumina	Australian Genome Research Facility	not provided	Sequencing by synthesis	16S rRNA
151	P59	scissors and forceps	cut	2019-04-03	26(28)	TRUE	0	meters	Host-associated	Animal	Animal pyloric caeca	marine biome	animal-associated habitat	intestine environment	host-associated	Australia:Tasmania	23	months	UBERON:gastrointestinal system	UBERON:lumen of gut	UBERON:colon	Atlantic salmon	569	cm	Salmo salar	0059	8030	2.58	kg	healthy	-41.1848	Decimal degrees	adult	146.371	Decimal degrees	stored in RNAlater and freezer at -80C	FALSE	other	metagenome	female	256318	Salmonid gut microbiome	Image analysis was performed in real time by the MiSeq Control Software (MCS) v2.6.2.1 and Real Time Analysis (RTA) v1.18.54, running on the instrument computer. RTA performs real-time base calling on the MiSeq instrument computer. Then the Illumina bcl2fastq 2.20.0.422 pipeline was used to generate the sequence data. The data generated here meet the AGRF quality standards	2 NT	Illumina	Australian Genome Research Facility	not provided	Sequencing by synthesis	16S rRNA
152	P60	scissors and forceps	cut	2019-04-03	26(28)	TRUE	0	meters	Host-associated	Animal	Animal pyloric caeca	marine biome	animal-associated habitat	intestine environment	host-associated	Australia:Tasmania	23	months	UBERON:gastrointestinal system	UBERON:lumen of gut	UBERON:colon	Atlantic salmon	573	cm	Salmo salar	0060	8030	2.54	kg	healthy	-41.1848	Decimal degrees	adult	146.371	Decimal degrees	stored in RNAlater and freezer at -80C	FALSE	other	metagenome	female	256318	Salmonid gut microbiome	Image analysis was performed in real time by the MiSeq Control Software (MCS) v2.6.2.1 and Real Time Analysis (RTA) v1.18.54, running on the instrument computer. RTA performs real-time base calling on the MiSeq instrument computer. Then the Illumina bcl2fastq 2.20.0.422 pipeline was used to generate the sequence data. The data generated here meet the AGRF quality standards	2 NT	Illumina	Australian Genome Research Facility	not provided	Sequencing by synthesis	16S rRNA
153	P61	scissors and forceps	cut	2019-04-03	26(28)	TRUE	0	meters	Host-associated	Animal	Animal pyloric caeca	marine biome	animal-associated habitat	intestine environment	host-associated	Australia:Tasmania	23	months	UBERON:gastrointestinal system	UBERON:lumen of gut	UBERON:colon	Atlantic salmon	516	cm	Salmo salar	0061	8030	1.48	kg	healthy	-41.1848	Decimal degrees	adult	146.371	Decimal degrees	stored in RNAlater and freezer at -80C	FALSE	other	metagenome	female	256318	Salmonid gut microbiome	Image analysis was performed in real time by the MiSeq Control Software (MCS) v2.6.2.1 and Real Time Analysis (RTA) v1.18.54, running on the instrument computer. RTA performs real-time base calling on the MiSeq instrument computer. Then the Illumina bcl2fastq 2.20.0.422 pipeline was used to generate the sequence data. The data generated here meet the AGRF quality standards	2 NT	Illumina	Australian Genome Research Facility	not provided	Sequencing by synthesis	16S rRNA
154	P62	scissors and forceps	cut	2019-04-03	26(28)	TRUE	0	meters	Host-associated	Animal	Animal pyloric caeca	marine biome	animal-associated habitat	intestine environment	host-associated	Australia:Tasmania	23	months	UBERON:gastrointestinal system	UBERON:lumen of gut	UBERON:colon	Atlantic salmon	609	cm	Salmo salar	0062	8030	2.82	kg	healthy	-41.1848	Decimal degrees	adult	146.371	Decimal degrees	stored in RNAlater and freezer at -80C	FALSE	other	metagenome	female	256318	Salmonid gut microbiome	Image analysis was performed in real time by the MiSeq Control Software (MCS) v2.6.2.1 and Real Time Analysis (RTA) v1.18.54, running on the instrument computer. RTA performs real-time base calling on the MiSeq instrument computer. Then the Illumina bcl2fastq 2.20.0.422 pipeline was used to generate the sequence data. The data generated here meet the AGRF quality standards	2 NT	Illumina	Australian Genome Research Facility	not provided	Sequencing by synthesis	16S rRNA
155	P63	scissors and forceps	cut	2019-04-03	26(28)	TRUE	0	meters	Host-associated	Animal	Animal pyloric caeca	marine biome	animal-associated habitat	intestine environment	host-associated	Australia:Tasmania	23	months	UBERON:gastrointestinal system	UBERON:lumen of gut	UBERON:colon	Atlantic salmon	555	cm	Salmo salar	0063	8030	2.33	kg	healthy	-41.1848	Decimal degrees	adult	146.371	Decimal degrees	stored in RNAlater and freezer at -80C	FALSE	other	metagenome	female	256318	Salmonid gut microbiome	Image analysis was performed in real time by the MiSeq Control Software (MCS) v2.6.2.1 and Real Time Analysis (RTA) v1.18.54, running on the instrument computer. RTA performs real-time base calling on the MiSeq instrument computer. Then the Illumina bcl2fastq 2.20.0.422 pipeline was used to generate the sequence data. The data generated here meet the AGRF quality standards	2 NT	Illumina	Australian Genome Research Facility	not provided	Sequencing by synthesis	16S rRNA
156	P64	scissors and forceps	cut	2019-04-03	26(28)	TRUE	0	meters	Host-associated	Animal	Animal pyloric caeca	marine biome	animal-associated habitat	intestine environment	host-associated	Australia:Tasmania	23	months	UBERON:gastrointestinal system	UBERON:lumen of gut	UBERON:colon	Atlantic salmon	590	cm	Salmo salar	0064	8030	3.22	kg	healthy	-41.1848	Decimal degrees	adult	146.371	Decimal degrees	stored in RNAlater and freezer at -80C	FALSE	other	metagenome	female	256318	Salmonid gut microbiome	Image analysis was performed in real time by the MiSeq Control Software (MCS) v2.6.2.1 and Real Time Analysis (RTA) v1.18.54, running on the instrument computer. RTA performs real-time base calling on the MiSeq instrument computer. Then the Illumina bcl2fastq 2.20.0.422 pipeline was used to generate the sequence data. The data generated here meet the AGRF quality standards	2 NT	Illumina	Australian Genome Research Facility	not provided	Sequencing by synthesis	16S rRNA
157	P65	scissors and forceps	cut	2019-04-03	26(28)	TRUE	0	meters	Host-associated	Animal	Animal pyloric caeca	marine biome	animal-associated habitat	intestine environment	host-associated	Australia:Tasmania	23	months	UBERON:gastrointestinal system	UBERON:lumen of gut	UBERON:colon	Atlantic salmon	580	cm	Salmo salar	0065	8030	2.34	kg	healthy	-41.1848	Decimal degrees	adult	146.371	Decimal degrees	stored in RNAlater and freezer at -80C	FALSE	other	metagenome	female	256318	Salmonid gut microbiome	Image analysis was performed in real time by the MiSeq Control Software (MCS) v2.6.2.1 and Real Time Analysis (RTA) v1.18.54, running on the instrument computer. RTA performs real-time base calling on the MiSeq instrument computer. Then the Illumina bcl2fastq 2.20.0.422 pipeline was used to generate the sequence data. The data generated here meet the AGRF quality standards	2 NT	Illumina	Australian Genome Research Facility	not provided	Sequencing by synthesis	16S rRNA
158	P66	scissors and forceps	cut	2019-04-03	26(28)	TRUE	0	meters	Host-associated	Animal	Animal pyloric caeca	marine biome	animal-associated habitat	intestine environment	host-associated	Australia:Tasmania	23	months	UBERON:gastrointestinal system	UBERON:lumen of gut	UBERON:colon	Atlantic salmon	526	cm	Salmo salar	0066	8030	2.28	kg	healthy	-41.1848	Decimal degrees	adult	146.371	Decimal degrees	stored in RNAlater and freezer at -80C	FALSE	other	metagenome	female	256318	Salmonid gut microbiome	Image analysis was performed in real time by the MiSeq Control Software (MCS) v2.6.2.1 and Real Time Analysis (RTA) v1.18.54, running on the instrument computer. RTA performs real-time base calling on the MiSeq instrument computer. Then the Illumina bcl2fastq 2.20.0.422 pipeline was used to generate the sequence data. The data generated here meet the AGRF quality standards	2 NT	Illumina	Australian Genome Research Facility	not provided	Sequencing by synthesis	16S rRNA
159	P67	scissors and forceps	cut	2019-04-03	26(28)	TRUE	0	meters	Host-associated	Animal	Animal pyloric caeca	marine biome	animal-associated habitat	intestine environment	host-associated	Australia:Tasmania	23	months	UBERON:gastrointestinal system	UBERON:lumen of gut	UBERON:colon	Atlantic salmon	530	cm	Salmo salar	0067	8030	1.86	kg	healthy	-41.1848	Decimal degrees	adult	146.371	Decimal degrees	stored in RNAlater and freezer at -80C	FALSE	other	metagenome	female	256318	Salmonid gut microbiome	Image analysis was performed in real time by the MiSeq Control Software (MCS) v2.6.2.1 and Real Time Analysis (RTA) v1.18.54, running on the instrument computer. RTA performs real-time base calling on the MiSeq instrument computer. Then the Illumina bcl2fastq 2.20.0.422 pipeline was used to generate the sequence data. The data generated here meet the AGRF quality standards	2 NT	Illumina	Australian Genome Research Facility	not provided	Sequencing by synthesis	16S rRNA
160	P68	scissors and forceps	cut	2019-04-03	26(28)	TRUE	0	meters	Host-associated	Animal	Animal pyloric caeca	marine biome	animal-associated habitat	intestine environment	host-associated	Australia:Tasmania	23	months	UBERON:gastrointestinal system	UBERON:lumen of gut	UBERON:colon	Atlantic salmon	520	cm	Salmo salar	0068	8030	1.75	kg	healthy	-41.1848	Decimal degrees	adult	146.371	Decimal degrees	stored in RNAlater and freezer at -80C	FALSE	other	metagenome	female	256318	Salmonid gut microbiome	Image analysis was performed in real time by the MiSeq Control Software (MCS) v2.6.2.1 and Real Time Analysis (RTA) v1.18.54, running on the instrument computer. RTA performs real-time base calling on the MiSeq instrument computer. Then the Illumina bcl2fastq 2.20.0.422 pipeline was used to generate the sequence data. The data generated here meet the AGRF quality standards	2 NT	Illumina	Australian Genome Research Facility	not provided	Sequencing by synthesis	16S rRNA
161	P69	scissors and forceps	cut	2019-04-03	26(28)	TRUE	0	meters	Host-associated	Animal	Animal pyloric caeca	marine biome	animal-associated habitat	intestine environment	host-associated	Australia:Tasmania	23	months	UBERON:gastrointestinal system	UBERON:lumen of gut	UBERON:colon	Atlantic salmon	540	cm	Salmo salar	0069	8030	2.09	kg	healthy	-41.1848	Decimal degrees	adult	146.371	Decimal degrees	stored in RNAlater and freezer at -80C	FALSE	other	metagenome	female	256318	Salmonid gut microbiome	Image analysis was performed in real time by the MiSeq Control Software (MCS) v2.6.2.1 and Real Time Analysis (RTA) v1.18.54, running on the instrument computer. RTA performs real-time base calling on the MiSeq instrument computer. Then the Illumina bcl2fastq 2.20.0.422 pipeline was used to generate the sequence data. The data generated here meet the AGRF quality standards	2 NT	Illumina	Australian Genome Research Facility	not provided	Sequencing by synthesis	16S rRNA
162	P70	scissors and forceps	cut	2019-04-03	26(28)	TRUE	0	meters	Host-associated	Animal	Animal pyloric caeca	marine biome	animal-associated habitat	intestine environment	host-associated	Australia:Tasmania	23	months	UBERON:gastrointestinal system	UBERON:lumen of gut	UBERON:colon	Atlantic salmon	538	cm	Salmo salar	0070	8030	2.35	kg	healthy	-41.1848	Decimal degrees	adult	146.371	Decimal degrees	stored in RNAlater and freezer at -80C	FALSE	other	metagenome	female	256318	Salmonid gut microbiome	Image analysis was performed in real time by the MiSeq Control Software (MCS) v2.6.2.1 and Real Time Analysis (RTA) v1.18.54, running on the instrument computer. RTA performs real-time base calling on the MiSeq instrument computer. Then the Illumina bcl2fastq 2.20.0.422 pipeline was used to generate the sequence data. The data generated here meet the AGRF quality standards	2 NT	Illumina	Australian Genome Research Facility	not provided	Sequencing by synthesis	16S rRNA
163	P71	scissors and forceps	cut	2019-04-03	26(28)	TRUE	0	meters	Host-associated	Animal	Animal pyloric caeca	marine biome	animal-associated habitat	intestine environment	host-associated	Australia:Tasmania	23	months	UBERON:gastrointestinal system	UBERON:lumen of gut	UBERON:colon	Atlantic salmon	610	cm	Salmo salar	0071	8030	3.46	kg	healthy	-41.1848	Decimal degrees	adult	146.371	Decimal degrees	stored in RNAlater and freezer at -80C	FALSE	other	metagenome	female	256318	Salmonid gut microbiome	Image analysis was performed in real time by the MiSeq Control Software (MCS) v2.6.2.1 and Real Time Analysis (RTA) v1.18.54, running on the instrument computer. RTA performs real-time base calling on the MiSeq instrument computer. Then the Illumina bcl2fastq 2.20.0.422 pipeline was used to generate the sequence data. The data generated here meet the AGRF quality standards	2 NT	Illumina	Australian Genome Research Facility	not provided	Sequencing by synthesis	16S rRNA
164	P72	scissors and forceps	cut	2019-04-03	26(28)	TRUE	0	meters	Host-associated	Animal	Animal pyloric caeca	marine biome	animal-associated habitat	intestine environment	host-associated	Australia:Tasmania	23	months	UBERON:gastrointestinal system	UBERON:lumen of gut	UBERON:colon	Atlantic salmon	506	cm	Salmo salar	0072	8030	1.6	kg	healthy	-41.1848	Decimal degrees	adult	146.371	Decimal degrees	stored in RNAlater and freezer at -80C	FALSE	other	metagenome	female	256318	Salmonid gut microbiome	Image analysis was performed in real time by the MiSeq Control Software (MCS) v2.6.2.1 and Real Time Analysis (RTA) v1.18.54, running on the instrument computer. RTA performs real-time base calling on the MiSeq instrument computer. Then the Illumina bcl2fastq 2.20.0.422 pipeline was used to generate the sequence data. The data generated here meet the AGRF quality standards	2 NT	Illumina	Australian Genome Research Facility	not provided	Sequencing by synthesis	16S rRNA
165	P73	scissors and forceps	cut	2019-04-03	26(28)	TRUE	0	meters	Host-associated	Animal	Animal pyloric caeca	marine biome	animal-associated habitat	intestine environment	host-associated	Australia:Tasmania	23	months	UBERON:gastrointestinal system	UBERON:lumen of gut	UBERON:colon	Atlantic salmon	588	cm	Salmo salar	0073	8030	2.55	kg	healthy	-41.1848	Decimal degrees	adult	146.371	Decimal degrees	stored in RNAlater and freezer at -80C	FALSE	other	metagenome	female	256318	Salmonid gut microbiome	Image analysis was performed in real time by the MiSeq Control Software (MCS) v2.6.2.1 and Real Time Analysis (RTA) v1.18.54, running on the instrument computer. RTA performs real-time base calling on the MiSeq instrument computer. Then the Illumina bcl2fastq 2.20.0.422 pipeline was used to generate the sequence data. The data generated here meet the AGRF quality standards	2 NT	Illumina	Australian Genome Research Facility	not provided	Sequencing by synthesis	16S rRNA
166	P74	scissors and forceps	cut	2019-04-03	26(28)	TRUE	0	meters	Host-associated	Animal	Animal pyloric caeca	marine biome	animal-associated habitat	intestine environment	host-associated	Australia:Tasmania	23	months	UBERON:gastrointestinal system	UBERON:lumen of gut	UBERON:colon	Atlantic salmon	572	cm	Salmo salar	0074	8030	2.36	kg	healthy	-41.1848	Decimal degrees	adult	146.371	Decimal degrees	stored in RNAlater and freezer at -80C	FALSE	other	metagenome	female	256318	Salmonid gut microbiome	Image analysis was performed in real time by the MiSeq Control Software (MCS) v2.6.2.1 and Real Time Analysis (RTA) v1.18.54, running on the instrument computer. RTA performs real-time base calling on the MiSeq instrument computer. Then the Illumina bcl2fastq 2.20.0.422 pipeline was used to generate the sequence data. The data generated here meet the AGRF quality standards	2 NT	Illumina	Australian Genome Research Facility	not provided	Sequencing by synthesis	16S rRNA
167	P75	scissors and forceps	cut	2019-04-03	26(28)	TRUE	0	meters	Host-associated	Animal	Animal pyloric caeca	marine biome	animal-associated habitat	intestine environment	host-associated	Australia:Tasmania	23	months	UBERON:gastrointestinal system	UBERON:lumen of gut	UBERON:colon	Atlantic salmon	586	cm	Salmo salar	0075	8030	2.8	kg	healthy	-41.1848	Decimal degrees	adult	146.371	Decimal degrees	stored in RNAlater and freezer at -80C	FALSE	other	metagenome	female	256318	Salmonid gut microbiome	Image analysis was performed in real time by the MiSeq Control Software (MCS) v2.6.2.1 and Real Time Analysis (RTA) v1.18.54, running on the instrument computer. RTA performs real-time base calling on the MiSeq instrument computer. Then the Illumina bcl2fastq 2.20.0.422 pipeline was used to generate the sequence data. The data generated here meet the AGRF quality standards	2 NT	Illumina	Australian Genome Research Facility	not provided	Sequencing by synthesis	16S rRNA
168	P76	scissors and forceps	cut	2019-04-03	26(28)	TRUE	0	meters	Host-associated	Animal	Animal pyloric caeca	marine biome	animal-associated habitat	intestine environment	host-associated	Australia:Tasmania	23	months	UBERON:gastrointestinal system	UBERON:lumen of gut	UBERON:colon	Atlantic salmon	516	cm	Salmo salar	0076	8030	1.38	kg	healthy	-41.1848	Decimal degrees	adult	146.371	Decimal degrees	stored in RNAlater and freezer at -80C	FALSE	other	metagenome	female	256318	Salmonid gut microbiome	Image analysis was performed in real time by the MiSeq Control Software (MCS) v2.6.2.1 and Real Time Analysis (RTA) v1.18.54, running on the instrument computer. RTA performs real-time base calling on the MiSeq instrument computer. Then the Illumina bcl2fastq 2.20.0.422 pipeline was used to generate the sequence data. The data generated here meet the AGRF quality standards	2 NT	Illumina	Australian Genome Research Facility	not provided	Sequencing by synthesis	16S rRNA
169	P77	scissors and forceps	cut	2019-04-03	26(28)	TRUE	0	meters	Host-associated	Animal	Animal pyloric caeca	marine biome	animal-associated habitat	intestine environment	host-associated	Australia:Tasmania	23	months	UBERON:gastrointestinal system	UBERON:lumen of gut	UBERON:colon	Atlantic salmon	480	cm	Salmo salar	0077	8030	1.2	kg	healthy	-41.1848	Decimal degrees	adult	146.371	Decimal degrees	stored in RNAlater and freezer at -80C	FALSE	other	metagenome	female	256318	Salmonid gut microbiome	Image analysis was performed in real time by the MiSeq Control Software (MCS) v2.6.2.1 and Real Time Analysis (RTA) v1.18.54, running on the instrument computer. RTA performs real-time base calling on the MiSeq instrument computer. Then the Illumina bcl2fastq 2.20.0.422 pipeline was used to generate the sequence data. The data generated here meet the AGRF quality standards	2 NT	Illumina	Australian Genome Research Facility	not provided	Sequencing by synthesis	16S rRNA
170	P78	scissors and forceps	cut	2019-04-03	26(28)	TRUE	0	meters	Host-associated	Animal	Animal pyloric caeca	marine biome	animal-associated habitat	intestine environment	host-associated	Australia:Tasmania	23	months	UBERON:gastrointestinal system	UBERON:lumen of gut	UBERON:colon	Atlantic salmon	572	cm	Salmo salar	0078	8030	2.59	kg	healthy	-41.1848	Decimal degrees	adult	146.371	Decimal degrees	stored in RNAlater and freezer at -80C	FALSE	other	metagenome	female	256318	Salmonid gut microbiome	Image analysis was performed in real time by the MiSeq Control Software (MCS) v2.6.2.1 and Real Time Analysis (RTA) v1.18.54, running on the instrument computer. RTA performs real-time base calling on the MiSeq instrument computer. Then the Illumina bcl2fastq 2.20.0.422 pipeline was used to generate the sequence data. The data generated here meet the AGRF quality standards	2 NT	Illumina	Australian Genome Research Facility	not provided	Sequencing by synthesis	16S rRNA
171	P79	scissors and forceps	cut	2019-04-03	26(28)	TRUE	0	meters	Host-associated	Animal	Animal pyloric caeca	marine biome	animal-associated habitat	intestine environment	host-associated	Australia:Tasmania	23	months	UBERON:gastrointestinal system	UBERON:lumen of gut	UBERON:colon	Atlantic salmon	590	cm	Salmo salar	0079	8030	2.92	kg	healthy	-41.1848	Decimal degrees	adult	146.371	Decimal degrees	stored in RNAlater and freezer at -80C	FALSE	other	metagenome	female	256318	Salmonid gut microbiome	Image analysis was performed in real time by the MiSeq Control Software (MCS) v2.6.2.1 and Real Time Analysis (RTA) v1.18.54, running on the instrument computer. RTA performs real-time base calling on the MiSeq instrument computer. Then the Illumina bcl2fastq 2.20.0.422 pipeline was used to generate the sequence data. The data generated here meet the AGRF quality standards	2 NT	Illumina	Australian Genome Research Facility	not provided	Sequencing by synthesis	16S rRNA
172	P80	scissors and forceps	cut	2019-04-03	26(28)	TRUE	0	meters	Host-associated	Animal	Animal pyloric caeca	marine biome	animal-associated habitat	intestine environment	host-associated	Australia:Tasmania	23	months	UBERON:gastrointestinal system	UBERON:lumen of gut	UBERON:colon	Atlantic salmon	539	cm	Salmo salar	0080	8030	1.93	kg	healthy	-41.1848	Decimal degrees	adult	146.371	Decimal degrees	stored in RNAlater and freezer at -80C	FALSE	other	metagenome	female	256318	Salmonid gut microbiome	Image analysis was performed in real time by the MiSeq Control Software (MCS) v2.6.2.1 and Real Time Analysis (RTA) v1.18.54, running on the instrument computer. RTA performs real-time base calling on the MiSeq instrument computer. Then the Illumina bcl2fastq 2.20.0.422 pipeline was used to generate the sequence data. The data generated here meet the AGRF quality standards	2 NT	Illumina	Australian Genome Research Facility	not provided	Sequencing by synthesis	16S rRNA
173	P81	scissors and forceps	cut	2019-04-03	26(28)	TRUE	0	meters	Host-associated	Animal	Animal pyloric caeca	marine biome	animal-associated habitat	intestine environment	host-associated	Australia:Tasmania	23	months	UBERON:gastrointestinal system	UBERON:lumen of gut	UBERON:colon	Atlantic salmon	540	cm	Salmo salar	0081	8030	1.97	kg	healthy	-41.1848	Decimal degrees	adult	146.371	Decimal degrees	stored in RNAlater and freezer at -80C	FALSE	other	metagenome	female	256318	Salmonid gut microbiome	Image analysis was performed in real time by the MiSeq Control Software (MCS) v2.6.2.1 and Real Time Analysis (RTA) v1.18.54, running on the instrument computer. RTA performs real-time base calling on the MiSeq instrument computer. Then the Illumina bcl2fastq 2.20.0.422 pipeline was used to generate the sequence data. The data generated here meet the AGRF quality standards	2 NT	Illumina	Australian Genome Research Facility	not provided	Sequencing by synthesis	16S rRNA
174	P82	scissors and forceps	cut	2019-04-03	26(28)	TRUE	0	meters	Host-associated	Animal	Animal pyloric caeca	marine biome	animal-associated habitat	intestine environment	host-associated	Australia:Tasmania	23	months	UBERON:gastrointestinal system	UBERON:lumen of gut	UBERON:colon	Atlantic salmon	548	cm	Salmo salar	0082	8030	2.24	kg	healthy	-41.1848	Decimal degrees	adult	146.371	Decimal degrees	stored in RNAlater and freezer at -80C	FALSE	other	metagenome	female	256318	Salmonid gut microbiome	Image analysis was performed in real time by the MiSeq Control Software (MCS) v2.6.2.1 and Real Time Analysis (RTA) v1.18.54, running on the instrument computer. RTA performs real-time base calling on the MiSeq instrument computer. Then the Illumina bcl2fastq 2.20.0.422 pipeline was used to generate the sequence data. The data generated here meet the AGRF quality standards	2 NT	Illumina	Australian Genome Research Facility	not provided	Sequencing by synthesis	16S rRNA
175	P83	scissors and forceps	cut	2019-04-03	26(28)	TRUE	0	meters	Host-associated	Animal	Animal pyloric caeca	marine biome	animal-associated habitat	intestine environment	host-associated	Australia:Tasmania	23	months	UBERON:gastrointestinal system	UBERON:lumen of gut	UBERON:colon	Atlantic salmon	552	cm	Salmo salar	0083	8030	1.97	kg	healthy	-41.1848	Decimal degrees	adult	146.371	Decimal degrees	stored in RNAlater and freezer at -80C	FALSE	other	metagenome	female	256318	Salmonid gut microbiome	Image analysis was performed in real time by the MiSeq Control Software (MCS) v2.6.2.1 and Real Time Analysis (RTA) v1.18.54, running on the instrument computer. RTA performs real-time base calling on the MiSeq instrument computer. Then the Illumina bcl2fastq 2.20.0.422 pipeline was used to generate the sequence data. The data generated here meet the AGRF quality standards	2 NT	Illumina	Australian Genome Research Facility	not provided	Sequencing by synthesis	16S rRNA
176	P84	scissors and forceps	cut	2019-04-03	26(28)	TRUE	0	meters	Host-associated	Animal	Animal pyloric caeca	marine biome	animal-associated habitat	intestine environment	host-associated	Australia:Tasmania	23	months	UBERON:gastrointestinal system	UBERON:lumen of gut	UBERON:colon	Atlantic salmon	589	cm	Salmo salar	0084	8030	2.37	kg	healthy	-41.1848	Decimal degrees	adult	146.371	Decimal degrees	stored in RNAlater and freezer at -80C	FALSE	other	metagenome	female	256318	Salmonid gut microbiome	Image analysis was performed in real time by the MiSeq Control Software (MCS) v2.6.2.1 and Real Time Analysis (RTA) v1.18.54, running on the instrument computer. RTA performs real-time base calling on the MiSeq instrument computer. Then the Illumina bcl2fastq 2.20.0.422 pipeline was used to generate the sequence data. The data generated here meet the AGRF quality standards	2 NT	Illumina	Australian Genome Research Facility	not provided	Sequencing by synthesis	16S rRNA
177	P85	scissors and forceps	cut	2019-04-03	26(28)	TRUE	0	meters	Host-associated	Animal	Animal pyloric caeca	marine biome	animal-associated habitat	intestine environment	host-associated	Australia:Tasmania	23	months	UBERON:gastrointestinal system	UBERON:lumen of gut	UBERON:colon	Atlantic salmon	550	cm	Salmo salar	0085	8030	2.85	kg	healthy	-41.1848	Decimal degrees	adult	146.371	Decimal degrees	stored in RNAlater and freezer at -80C	FALSE	other	metagenome	female	256318	Salmonid gut microbiome	Image analysis was performed in real time by the MiSeq Control Software (MCS) v2.6.2.1 and Real Time Analysis (RTA) v1.18.54, running on the instrument computer. RTA performs real-time base calling on the MiSeq instrument computer. Then the Illumina bcl2fastq 2.20.0.422 pipeline was used to generate the sequence data. The data generated here meet the AGRF quality standards	2 NT	Illumina	Australian Genome Research Facility	not provided	Sequencing by synthesis	16S rRNA
178	P86	scissors and forceps	cut	2019-04-03	26(28)	TRUE	0	meters	Host-associated	Animal	Animal pyloric caeca	marine biome	animal-associated habitat	intestine environment	host-associated	Australia:Tasmania	23	months	UBERON:gastrointestinal system	UBERON:lumen of gut	UBERON:colon	Atlantic salmon	549	cm	Salmo salar	0086	8030	2.38	kg	healthy	-41.1848	Decimal degrees	adult	146.371	Decimal degrees	stored in RNAlater and freezer at -80C	FALSE	other	metagenome	female	256318	Salmonid gut microbiome	Image analysis was performed in real time by the MiSeq Control Software (MCS) v2.6.2.1 and Real Time Analysis (RTA) v1.18.54, running on the instrument computer. RTA performs real-time base calling on the MiSeq instrument computer. Then the Illumina bcl2fastq 2.20.0.422 pipeline was used to generate the sequence data. The data generated here meet the AGRF quality standards	2 NT	Illumina	Australian Genome Research Facility	not provided	Sequencing by synthesis	16S rRNA
179	P87	scissors and forceps	cut	2019-04-03	26(28)	TRUE	0	meters	Host-associated	Animal	Animal pyloric caeca	marine biome	animal-associated habitat	intestine environment	host-associated	Australia:Tasmania	23	months	UBERON:gastrointestinal system	UBERON:lumen of gut	UBERON:colon	Atlantic salmon	526	cm	Salmo salar	0087	8030	1.81	kg	healthy	-41.1848	Decimal degrees	adult	146.371	Decimal degrees	stored in RNAlater and freezer at -80C	FALSE	other	metagenome	female	256318	Salmonid gut microbiome	Image analysis was performed in real time by the MiSeq Control Software (MCS) v2.6.2.1 and Real Time Analysis (RTA) v1.18.54, running on the instrument computer. RTA performs real-time base calling on the MiSeq instrument computer. Then the Illumina bcl2fastq 2.20.0.422 pipeline was used to generate the sequence data. The data generated here meet the AGRF quality standards	2 NT	Illumina	Australian Genome Research Facility	not provided	Sequencing by synthesis	16S rRNA
180	P88	scissors and forceps	cut	2019-04-03	26(28)	TRUE	0	meters	Host-associated	Animal	Animal pyloric caeca	marine biome	animal-associated habitat	intestine environment	host-associated	Australia:Tasmania	23	months	UBERON:gastrointestinal system	UBERON:lumen of gut	UBERON:colon	Atlantic salmon	574	cm	Salmo salar	0088	8030	2.32	kg	healthy	-41.1848	Decimal degrees	adult	146.371	Decimal degrees	stored in RNAlater and freezer at -80C	FALSE	other	metagenome	female	256318	Salmonid gut microbiome	Image analysis was performed in real time by the MiSeq Control Software (MCS) v2.6.2.1 and Real Time Analysis (RTA) v1.18.54, running on the instrument computer. RTA performs real-time base calling on the MiSeq instrument computer. Then the Illumina bcl2fastq 2.20.0.422 pipeline was used to generate the sequence data. The data generated here meet the AGRF quality standards	2 NT	Illumina	Australian Genome Research Facility	not provided	Sequencing by synthesis	16S rRNA
181	P89	scissors and forceps	cut	2019-04-03	26(28)	TRUE	0	meters	Host-associated	Animal	Animal pyloric caeca	marine biome	animal-associated habitat	intestine environment	host-associated	Australia:Tasmania	23	months	UBERON:gastrointestinal system	UBERON:lumen of gut	UBERON:colon	Atlantic salmon	561	cm	Salmo salar	0089	8030	2.3	kg	healthy	-41.1848	Decimal degrees	adult	146.371	Decimal degrees	stored in RNAlater and freezer at -80C	FALSE	other	metagenome	female	256318	Salmonid gut microbiome	Image analysis was performed in real time by the MiSeq Control Software (MCS) v2.6.2.1 and Real Time Analysis (RTA) v1.18.54, running on the instrument computer. RTA performs real-time base calling on the MiSeq instrument computer. Then the Illumina bcl2fastq 2.20.0.422 pipeline was used to generate the sequence data. The data generated here meet the AGRF quality standards	2 NT	Illumina	Australian Genome Research Facility	not provided	Sequencing by synthesis	16S rRNA
182	P90	scissors and forceps	cut	2019-04-03	26(28)	TRUE	0	meters	Host-associated	Animal	Animal pyloric caeca	marine biome	animal-associated habitat	intestine environment	host-associated	Australia:Tasmania	23	months	UBERON:gastrointestinal system	UBERON:lumen of gut	UBERON:colon	Atlantic salmon	553	cm	Salmo salar	0090	8030	2.35	kg	healthy	-41.1848	Decimal degrees	adult	146.371	Decimal degrees	stored in RNAlater and freezer at -80C	FALSE	other	metagenome	female	256318	Salmonid gut microbiome	Image analysis was performed in real time by the MiSeq Control Software (MCS) v2.6.2.1 and Real Time Analysis (RTA) v1.18.54, running on the instrument computer. RTA performs real-time base calling on the MiSeq instrument computer. Then the Illumina bcl2fastq 2.20.0.422 pipeline was used to generate the sequence data. The data generated here meet the AGRF quality standards	2 NT	Illumina	Australian Genome Research Facility	not provided	Sequencing by synthesis	16S rRNA
183	P91	scissors and forceps	cut	2019-04-03	26(28)	TRUE	0	meters	Host-associated	Animal	Animal pyloric caeca	marine biome	animal-associated habitat	intestine environment	host-associated	Australia:Tasmania	23	months	UBERON:gastrointestinal system	UBERON:lumen of gut	UBERON:colon	Atlantic salmon	545	cm	Salmo salar	0091	8030	1.96	kg	healthy	-41.1848	Decimal degrees	adult	146.371	Decimal degrees	stored in RNAlater and freezer at -80C	FALSE	other	metagenome	female	256318	Salmonid gut microbiome	Image analysis was performed in real time by the MiSeq Control Software (MCS) v2.6.2.1 and Real Time Analysis (RTA) v1.18.54, running on the instrument computer. RTA performs real-time base calling on the MiSeq instrument computer. Then the Illumina bcl2fastq 2.20.0.422 pipeline was used to generate the sequence data. The data generated here meet the AGRF quality standards	2 NT	Illumina	Australian Genome Research Facility	not provided	Sequencing by synthesis	16S rRNA
184	P92	scissors and forceps	cut	2019-04-03	26(28)	TRUE	0	meters	Host-associated	Animal	Animal pyloric caeca	marine biome	animal-associated habitat	intestine environment	host-associated	Australia:Tasmania	23	months	UBERON:gastrointestinal system	UBERON:lumen of gut	UBERON:colon	Atlantic salmon	534	cm	Salmo salar	0092	8030	1.77	kg	healthy	-41.1848	Decimal degrees	adult	146.371	Decimal degrees	stored in RNAlater and freezer at -80C	FALSE	other	metagenome	female	256318	Salmonid gut microbiome	Image analysis was performed in real time by the MiSeq Control Software (MCS) v2.6.2.1 and Real Time Analysis (RTA) v1.18.54, running on the instrument computer. RTA performs real-time base calling on the MiSeq instrument computer. Then the Illumina bcl2fastq 2.20.0.422 pipeline was used to generate the sequence data. The data generated here meet the AGRF quality standards	2 NT	Illumina	Australian Genome Research Facility	not provided	Sequencing by synthesis	16S rRNA
185	P93	scissors and forceps	cut	2019-04-03	26(28)	TRUE	0	meters	Host-associated	Animal	Animal pyloric caeca	marine biome	animal-associated habitat	intestine environment	host-associated	Australia:Tasmania	23	months	UBERON:gastrointestinal system	UBERON:lumen of gut	UBERON:colon	Atlantic salmon	575	cm	Salmo salar	0093	8030	2.82	kg	healthy	-41.1848	Decimal degrees	adult	146.371	Decimal degrees	stored in RNAlater and freezer at -80C	FALSE	other	metagenome	female	256318	Salmonid gut microbiome	Image analysis was performed in real time by the MiSeq Control Software (MCS) v2.6.2.1 and Real Time Analysis (RTA) v1.18.54, running on the instrument computer. RTA performs real-time base calling on the MiSeq instrument computer. Then the Illumina bcl2fastq 2.20.0.422 pipeline was used to generate the sequence data. The data generated here meet the AGRF quality standards	2 NT	Illumina	Australian Genome Research Facility	not provided	Sequencing by synthesis	16S rRNA
186	P94	scissors and forceps	cut	2019-04-03	26(28)	TRUE	0	meters	Host-associated	Animal	Animal pyloric caeca	marine biome	animal-associated habitat	intestine environment	host-associated	Australia:Tasmania	23	months	UBERON:gastrointestinal system	UBERON:lumen of gut	UBERON:colon	Atlantic salmon	534	cm	Salmo salar	0094	8030	2.05	kg	healthy	-41.1848	Decimal degrees	adult	146.371	Decimal degrees	stored in RNAlater and freezer at -80C	FALSE	other	metagenome	female	256318	Salmonid gut microbiome	Image analysis was performed in real time by the MiSeq Control Software (MCS) v2.6.2.1 and Real Time Analysis (RTA) v1.18.54, running on the instrument computer. RTA performs real-time base calling on the MiSeq instrument computer. Then the Illumina bcl2fastq 2.20.0.422 pipeline was used to generate the sequence data. The data generated here meet the AGRF quality standards	2 NT	Illumina	Australian Genome Research Facility	not provided	Sequencing by synthesis	16S rRNA
187	P95	scissors and forceps	cut	2019-04-03	26(28)	TRUE	0	meters	Host-associated	Animal	Animal pyloric caeca	marine biome	animal-associated habitat	intestine environment	host-associated	Australia:Tasmania	23	months	UBERON:gastrointestinal system	UBERON:lumen of gut	UBERON:colon	Atlantic salmon	581	cm	Salmo salar	0095	8030	2.26	kg	healthy	-41.1848	Decimal degrees	adult	146.371	Decimal degrees	stored in RNAlater and freezer at -80C	FALSE	other	metagenome	female	256318	Salmonid gut microbiome	Image analysis was performed in real time by the MiSeq Control Software (MCS) v2.6.2.1 and Real Time Analysis (RTA) v1.18.54, running on the instrument computer. RTA performs real-time base calling on the MiSeq instrument computer. Then the Illumina bcl2fastq 2.20.0.422 pipeline was used to generate the sequence data. The data generated here meet the AGRF quality standards	2 NT	Illumina	Australian Genome Research Facility	not provided	Sequencing by synthesis	16S rRNA
188	P96	scissors and forceps	cut	2019-04-03	26(28)	TRUE	0	meters	Host-associated	Animal	Animal pyloric caeca	marine biome	animal-associated habitat	intestine environment	host-associated	Australia:Tasmania	23	months	UBERON:gastrointestinal system	UBERON:lumen of gut	UBERON:colon	Atlantic salmon	519	cm	Salmo salar	0096	8030	1.78	kg	healthy	-41.1848	Decimal degrees	adult	146.371	Decimal degrees	stored in RNAlater and freezer at -80C	FALSE	other	metagenome	female	256318	Salmonid gut microbiome	Image analysis was performed in real time by the MiSeq Control Software (MCS) v2.6.2.1 and Real Time Analysis (RTA) v1.18.54, running on the instrument computer. RTA performs real-time base calling on the MiSeq instrument computer. Then the Illumina bcl2fastq 2.20.0.422 pipeline was used to generate the sequence data. The data generated here meet the AGRF quality standards	2 NT	Illumina	Australian Genome Research Facility	not provided	Sequencing by synthesis	16S rRNA
189	P97	scissors and forceps	cut	2019-04-03	26(28)	TRUE	0	meters	Host-associated	Animal	Animal pyloric caeca	marine biome	animal-associated habitat	intestine environment	host-associated	Australia:Tasmania	23	months	UBERON:gastrointestinal system	UBERON:lumen of gut	UBERON:colon	Atlantic salmon	540	cm	Salmo salar	0097	8030	1.94	kg	healthy	-41.1848	Decimal degrees	adult	146.371	Decimal degrees	stored in RNAlater and freezer at -80C	FALSE	other	metagenome	female	256318	Salmonid gut microbiome	Image analysis was performed in real time by the MiSeq Control Software (MCS) v2.6.2.1 and Real Time Analysis (RTA) v1.18.54, running on the instrument computer. RTA performs real-time base calling on the MiSeq instrument computer. Then the Illumina bcl2fastq 2.20.0.422 pipeline was used to generate the sequence data. The data generated here meet the AGRF quality standards	2 NT	Illumina	Australian Genome Research Facility	not provided	Sequencing by synthesis	16S rRNA
190	P98	scissors and forceps	cut	2019-04-03	26(28)	TRUE	0	meters	Host-associated	Animal	Animal pyloric caeca	marine biome	animal-associated habitat	intestine environment	host-associated	Australia:Tasmania	23	months	UBERON:gastrointestinal system	UBERON:lumen of gut	UBERON:colon	Atlantic salmon	510	cm	Salmo salar	0098	8030	1.66	kg	healthy	-41.1848	Decimal degrees	adult	146.371	Decimal degrees	stored in RNAlater and freezer at -80C	FALSE	other	metagenome	female	256318	Salmonid gut microbiome	Image analysis was performed in real time by the MiSeq Control Software (MCS) v2.6.2.1 and Real Time Analysis (RTA) v1.18.54, running on the instrument computer. RTA performs real-time base calling on the MiSeq instrument computer. Then the Illumina bcl2fastq 2.20.0.422 pipeline was used to generate the sequence data. The data generated here meet the AGRF quality standards	2 NT	Illumina	Australian Genome Research Facility	not provided	Sequencing by synthesis	16S rRNA
191	P99	scissors and forceps	cut	2019-04-03	26(28)	TRUE	0	meters	Host-associated	Animal	Animal pyloric caeca	marine biome	animal-associated habitat	intestine environment	host-associated	Australia:Tasmania	23	months	UBERON:gastrointestinal system	UBERON:lumen of gut	UBERON:colon	Atlantic salmon	587	cm	Salmo salar	0099	8030	2.43	kg	healthy	-41.1848	Decimal degrees	adult	146.371	Decimal degrees	stored in RNAlater and freezer at -80C	FALSE	other	metagenome	female	256318	Salmonid gut microbiome	Image analysis was performed in real time by the MiSeq Control Software (MCS) v2.6.2.1 and Real Time Analysis (RTA) v1.18.54, running on the instrument computer. RTA performs real-time base calling on the MiSeq instrument computer. Then the Illumina bcl2fastq 2.20.0.422 pipeline was used to generate the sequence data. The data generated here meet the AGRF quality standards	2 NT	Illumina	Australian Genome Research Facility	not provided	Sequencing by synthesis	16S rRNA
192	P100	scissors and forceps	cut	2019-04-03	26(28)	TRUE	0	meters	Host-associated	Animal	Animal pyloric caeca	marine biome	animal-associated habitat	intestine environment	host-associated	Australia:Tasmania	23	months	UBERON:gastrointestinal system	UBERON:lumen of gut	UBERON:colon	Atlantic salmon	565	cm	Salmo salar	0100	8030	2.11	kg	healthy	-41.1848	Decimal degrees	adult	146.371	Decimal degrees	stored in RNAlater and freezer at -80C	FALSE	other	metagenome	female	256318	Salmonid gut microbiome	Image analysis was performed in real time by the MiSeq Control Software (MCS) v2.6.2.1 and Real Time Analysis (RTA) v1.18.54, running on the instrument computer. RTA performs real-time base calling on the MiSeq instrument computer. Then the Illumina bcl2fastq 2.20.0.422 pipeline was used to generate the sequence data. The data generated here meet the AGRF quality standards	2 NT	Illumina	Australian Genome Research Facility	not provided	Sequencing by synthesis	16S rRNA
193	NC_E1	not applicable	cut	2019-04-03	not applicable	TRUE	0	meters	not applicable	not applicable	not applicable	not applicable	not applicable	not applicable	environment-associated	not applicable	not applicable	not applicable	not applicable	not applicable	not applicable	not applicable	not applicable	not applicable	not applicable	not applicable	not applicable	not applicable	not applicable	not applicable	not applicable	not applicable	not applicable	not applicable	not applicable	stored in RNAlater and freezer at -80C	FALSE	other	metagenome	not applicable	not applicable	not applicable	Image analysis was performed in real time by the MiSeq Control Software (MCS) v2.6.2.1 and Real Time Analysis (RTA) v1.18.54, running on the instrument computer. RTA performs real-time base calling on the MiSeq instrument computer. Then the Illumina bcl2fastq 2.20.0.422 pipeline was used to generate the sequence data. The data generated here meet the AGRF quality standards	2 NT	Illumina	Australian Genome Research Facility	not provided	Sequencing by synthesis	16S rRNA
194	NC_E2	not applicable	cut	2019-04-03	not applicable	TRUE	0	meters	not applicable	not applicable	not applicable	not applicable	not applicable	not applicable	environment-associated	not applicable	not applicable	not applicable	not applicable	not applicable	not applicable	not applicable	not applicable	not applicable	not applicable	not applicable	not applicable	not applicable	not applicable	not applicable	not applicable	not applicable	not applicable	not applicable	not applicable	stored in RNAlater and freezer at -80C	FALSE	other	metagenome	not applicable	not applicable	not applicable	Image analysis was performed in real time by the MiSeq Control Software (MCS) v2.6.2.1 and Real Time Analysis (RTA) v1.18.54, running on the instrument computer. RTA performs real-time base calling on the MiSeq instrument computer. Then the Illumina bcl2fastq 2.20.0.422 pipeline was used to generate the sequence data. The data generated here meet the AGRF quality standards	2 NT	Illumina	Australian Genome Research Facility	not provided	Sequencing by synthesis	16S rRNA
195	NC_W1	not applicable	cut	2019-04-03	not applicable	TRUE	0	meters	not applicable	not applicable	not applicable	not applicable	not applicable	not applicable	environment-associated	not applicable	not applicable	not applicable	not applicable	not applicable	not applicable	not applicable	not applicable	not applicable	not applicable	not applicable	not applicable	not applicable	not applicable	not applicable	-41.1848	Decimal degrees	not applicable	not applicable	not applicable	stored in RNAlater and freezer at -80C	FALSE	other	metagenome	not applicable	not applicable	not applicable	Image analysis was performed in real time by the MiSeq Control Software (MCS) v2.6.2.1 and Real Time Analysis (RTA) v1.18.54, running on the instrument computer. RTA performs real-time base calling on the MiSeq instrument computer. Then the Illumina bcl2fastq 2.20.0.422 pipeline was used to generate the sequence data. The data generated here meet the AGRF quality standards	2 NT	Illumina	Australian Genome Research Facility	not provided	Sequencing by synthesis	16S rRNA
196	NC_W2	not applicable	cut	2019-04-03	not applicable	TRUE	0	meters	not applicable	not applicable	not applicable	not applicable	not applicable	not applicable	environment-associated	not applicable	not applicable	not applicable	not applicable	not applicable	not applicable	not applicable	not applicable	not applicable	not applicable	not applicable	not applicable	not applicable	not applicable	not applicable	-41.1848	Decimal degrees	not applicable	not applicable	not applicable	stored in RNAlater and freezer at -80C	FALSE	other	metagenome	not applicable	not applicable	not applicable	Image analysis was performed in real time by the MiSeq Control Software (MCS) v2.6.2.1 and Real Time Analysis (RTA) v1.18.54, running on the instrument computer. RTA performs real-time base calling on the MiSeq instrument computer. Then the Illumina bcl2fastq 2.20.0.422 pipeline was used to generate the sequence data. The data generated here meet the AGRF quality standards	2 NT	Illumina	Australian Genome Research Facility	not provided	Sequencing by synthesis	16S rRNA
[truncated: 10 more columns]
